# Supplementary material for: Psychological distress and trauma in doctors providing frontline care during the COVID-19 pandemic in the United Kingdom and Ireland: a prospective longitudinal survey cohort study
Source: PubMed Central journal article supplement — BMJ Open. 2021 Jul 9;11(7):e049680. doi: 10.1136/bmjopen-2021-049680 (PMC8275363; doi:10.1136/bmjopen-2021-049680), 2021-07-09
Supplement: bmjopen-2021-049680.draft_revisions.pdf [file bmjopen-2021-049680.draft_revisions.pdf]

# BMJ Open

BMJ Open is committed to open peer review. As part of this commitment we make the peer review history of every article we publish publicly available.

When an article is published we post the peer reviewers' comments and the authors' responses online. We also post the versions of the paper that were used during peer review. These are the versions that the peer review comments apply to.

The versions of the paper that follow are the versions that were submitted during the peer review process. They are not the versions of record or the final published versions. They should not be cited or distributed as the published version of this manuscript.

BMJ Open is an open access journal and the full, final, typeset and author-corrected version of record of the manuscript is available on our site with no access controls, subscription charges or pay-per-view fees (<http://bmjopen.bmj.com>).

If you have any questions on BMJ Open's open peer review process please email [info.bmjopen@bmj.com](mailto:info.bmjopen@bmj.com)

# BMJ Open

## Psychological Distress and Trauma in Doctors Providing Frontline Care During the COVID-19 Pandemic in the United Kingdom and Ireland: A Prospective Longitudinal Survey Cohort Study

|                               |                                                                                                                                                                                                                                                                                                                                                                                                                                                                                                                                                                                                                                                                                                                                                                                                                                                                                                                                                                                                                                                                                                                                                                                                                                                                                                    |
|-------------------------------|----------------------------------------------------------------------------------------------------------------------------------------------------------------------------------------------------------------------------------------------------------------------------------------------------------------------------------------------------------------------------------------------------------------------------------------------------------------------------------------------------------------------------------------------------------------------------------------------------------------------------------------------------------------------------------------------------------------------------------------------------------------------------------------------------------------------------------------------------------------------------------------------------------------------------------------------------------------------------------------------------------------------------------------------------------------------------------------------------------------------------------------------------------------------------------------------------------------------------------------------------------------------------------------------------|
| Journal:                      | <i>BMJ Open</i>                                                                                                                                                                                                                                                                                                                                                                                                                                                                                                                                                                                                                                                                                                                                                                                                                                                                                                                                                                                                                                                                                                                                                                                                                                                                                    |
| Manuscript ID                 | bmjopen-2021-049680                                                                                                                                                                                                                                                                                                                                                                                                                                                                                                                                                                                                                                                                                                                                                                                                                                                                                                                                                                                                                                                                                                                                                                                                                                                                                |
| Article Type:                 | Original research                                                                                                                                                                                                                                                                                                                                                                                                                                                                                                                                                                                                                                                                                                                                                                                                                                                                                                                                                                                                                                                                                                                                                                                                                                                                                  |
| Date Submitted by the Author: | 01-Feb-2021                                                                                                                                                                                                                                                                                                                                                                                                                                                                                                                                                                                                                                                                                                                                                                                                                                                                                                                                                                                                                                                                                                                                                                                                                                                                                        |
| Complete List of Authors:     | <p>Roberts, Tom; Royal College of Emergency Medicine, Emergency Department; Bristol Royal Hospital for Children, Emergency Department<br/> Daniels, Jo; University of Bath<br/> Hulme, William<br/> Hirst, Robert; North Bristol NHS Trust, Department of Anaesthesia<br/> Horner , Daniel; The Royal College of Emergency Medicine; Salford Royal Hospitals NHS Trust, Department of Intensive Care<br/> Lyttle, Mark; Bristol Royal Hospital for Children, Emergency Department; University of the West of England, Faculty of Health and Applied Science<br/> Samuel, Katie; North Bristol NHS Trust, Department of Anaesthesia<br/> Graham, Blair; University of Plymouth; Plymouth Hospitals NHS Foundation Trust, Emergency Department<br/> Reynard, Charles ; The University of Manchester<br/> Barrett, Michael; Children's Health Ireland at Crumlin, Emergency Medicine; University College Dublin, School of Medicine<br/> Foley, James; University Hospital Waterford, Emergency Department<br/> Cronin, John; St Vincent's University Hospital, Emergency Department<br/> Umana, Etimbuk; Connolly Hospital Blanchardstown, Emergency Department<br/> Vinagre, Joao; College of Anaesthesiologists of Ireland<br/> Carlton, Edward; North Bristol NHS Trust, Emergency Department</p> |
| Keywords:                     | ACCIDENT & EMERGENCY MEDICINE, Adult anaesthesia < ANAESTHETICS, Adult intensive & critical care < ANAESTHETICS, COVID-19, Adult intensive & critical care < INTENSIVE & CRITICAL CARE, MENTAL HEALTH                                                                                                                                                                                                                                                                                                                                                                                                                                                                                                                                                                                                                                                                                                                                                                                                                                                                                                                                                                                                                                                                                              |
|                               |                                                                                                                                                                                                                                                                                                                                                                                                                                                                                                                                                                                                                                                                                                                                                                                                                                                                                                                                                                                                                                                                                                                                                                                                                                                                                                    |

SCHOLARONE™  
Manuscripts

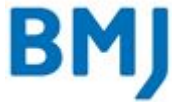

I, the Submitting Author has the right to grant and does grant on behalf of all authors of the Work (as defined in the below author licence), an exclusive licence and/or a non-exclusive licence for contributions from authors who are: i) UK Crown employees; ii) where BMJ has agreed a CC-BY licence shall apply, and/or iii) in accordance with the terms applicable for US Federal Government officers or employees acting as part of their official duties; on a worldwide, perpetual, irrevocable, royalty-free basis to BMJ Publishing Group Ltd ("BMJ") its licensees and where the relevant Journal is co-owned by BMJ to the co-owners of the Journal, to publish the Work in this journal and any other BMJ products and to exploit all rights, as set out in our [licence](#).

The Submitting Author accepts and understands that any supply made under these terms is made by BMJ to the Submitting Author unless you are acting as an employee on behalf of your employer or a postgraduate student of an affiliated institution which is paying any applicable article publishing charge ("APC") for Open Access articles. Where the Submitting Author wishes to make the Work available on an Open Access basis (and intends to pay the relevant APC), the terms of reuse of such Open Access shall be governed by a Creative Commons licence – details of these licences and which [Creative Commons](#) licence will apply to this Work are set out in our licence referred to above.

Other than as permitted in any relevant BMJ Author's Self Archiving Policies, I confirm this Work has not been accepted for publication elsewhere, is not being considered for publication elsewhere and does not duplicate material already published. I confirm all authors consent to publication of this Work and authorise the granting of this licence.

**Title Page****Psychological Distress and Trauma in Doctors Providing Frontline Care During the COVID-19 Pandemic in the United Kingdom and Ireland: A Prospective Longitudinal Survey Cohort Study**

**Authors:** Tom Roberts<sup>1,2</sup>, Jo Daniels<sup>3</sup>, William Hulme<sup>4</sup>, Robert Hirst<sup>5</sup>, Daniel Horner<sup>1,6</sup>, Mark D Lyttle<sup>2,7</sup>, Katie Samuel<sup>5</sup>, Blair Graham<sup>8,9</sup>, Charles Reynard<sup>10</sup>, Michael J Barrett<sup>11,12</sup>, James Foley<sup>13</sup>, John Cronin<sup>14</sup>, Etimbuk Umana<sup>15</sup>, Joao Vinagre<sup>16</sup> and Edward Carlton<sup>1,17</sup> on behalf of The Trainee Emergency Research Network (TERN), The Paediatric Emergency Research Network UK and Ireland (PERUKI), Research and Audit Federation of Trainees (RAFT), Irish Trainee Emergency Research Network (ITERN and Trainee Research in Intensive Care (TRIC))

**Affiliations:**

- 1) The Royal College of Emergency Medicine, London, UK
- 2) Emergency Department, Bristol Royal Hospital for Children, UK
- 3) Department of Psychology, University of Bath, UK
- 4) Statistical Consultant, Oxford, UK
- 5) Department of Anaesthesia, North Bristol NHS Trust, UK
- 6) Emergency Department, Salford Royal Hospital NHS Foundation Trust
- 7) Faculty of Health and Applied Sciences, University of the West of England, Bristol
- 8) Faculty of Health, University of Plymouth, Plymouth, UK.
- 9) Emergency Department, University Hospitals Plymouth, UK
- 10) Department of Cardiovascular Sciences, University of Manchester
- 11) Department of Emergency Medicine, Children's Health Ireland at Crumlin, Ireland
- 12) Women's and Children's Health, School of Medicine, University College Dublin, Ireland
- 13) Emergency Department, University Hospital Waterford, Waterford, Ireland
- 14) Department of Emergency Medicine, St Vincent's University Hospital, Dublin, Ireland
- 15) Emergency Department, Connolly Hospital Blanchardstown, Dublin, Ireland.
- 16) College of Anaesthesiologists of Ireland, Dublin, Ireland
- 17) Emergency Department, North Bristol NHS Trust

**Corresponding Author**

Dr Tom Roberts

Address: 12 Hamilton Road, Bristol, BS3 1PB

Email: [Tomkieranroberts@gmail.com](mailto:Tomkieranroberts@gmail.com)

Telephone: 07894234121

Abstract Word Count: 304

Manuscript Word Count: 3561

## Objectives

The psychological impact of the COVID-19 pandemic on doctors is a significant concern. Due to the emergence of a multiple pandemic waves, longitudinal data on the impact of COVID-19 is vital to ensure an adequate psychological response. The primary aim was to assess the prevalence and degree of psychological distress and trauma in frontline doctors during the acceleration, peak and deceleration of the COVID-19 first wave. Personal and professional factors associated with psychological distress are also reported.

## Design

A prospective online three-part longitudinal survey.

## Setting

Acute hospitals in the UK and Ireland.

## Participants

Frontline doctors working in Emergency Medicine (EM), Anaesthetics and Intensive Care Medicine (ICM) during the first wave of the COVID-19 pandemic in March 2020.

## Primary outcome measures

Psychological distress and trauma measured using the General Health Questionnaire-12 and the Impact of Events-Revised.

## Results

The initial acceleration survey distributed across networks generated a sample of 5440 doctors. Peak and deceleration response rates from the original sample were 71.6% (n=3896) and 56.6% (n=3079) respectively. Prevalence of psychological distress was 44.7% (n=1334) during the acceleration, 36.9% (n=1098) at peak and 31.5% (n=918) at the deceleration phase. The prevalence of trauma was 23.7% (n=647) at peak and 17.7% (n=484) at deceleration. The prevalence of probable post-traumatic stress disorder was 12.6% (n=343) at peak and 10.1% (n=276) at deceleration. Worry of family infection due to clinical work was most strongly associated with both distress ( $R^2 = 0.06$ ) and trauma ( $R^2 = 0.10$ ).

## Conclusion

Findings reflect a pattern of elevated distress at acceleration and peak, with some natural recovery. It is essential that policymakers seek to prevent future adverse effects through (a) provision of vital equipment to mitigate physical and psychological harm (b) increased awareness and recognition of signs of psychological distress and (c) the development of clear pathways to effective psychological care.

**Trial Registration:** ISRCTN 10666798

**Strength and limitations of this study**

- This paper presents key findings from a large cross-sectional longitudinal survey of practising emergency, anaesthetic and intensive care doctors in UK and Ireland during the acceleration, peak and deceleration of the first wave of the COVID-19 pandemic.
- This study provides an insight into the associated personal and professional factors associated with trauma and distress and could be utilised to identify those doctors who will most benefit from psychological interventions.
- Variation in regional peaks may have influenced accurate capturing of psychological distress and trauma rates and have not been accounted for.
- This data does not provide further long-term follow-up of participants.

## Introduction

Clinicians providing frontline care have become central to the primary reception, assessment, and ongoing hospital treatment of patients with suspected Coronavirus Infectious Disease 2019 (COVID-19). These include doctors working in Emergency Medicine (EM), Anaesthetics and Intensive Care Medicine (ICM). Whilst this healthcare workforce is highly resilient and accustomed to facing traumatic situations, the COVID-19 pandemic has imposed unprecedented demands in workload intensity and personal health risk. <sup>1-4</sup> High infection rates have been reported in frontline clinicians, with over 150 fatalities in the UK by May 2020. <sup>5</sup> These factors are likely to affect psychological wellbeing, increasing the risk of traumatic stress both in the acute phase of the pandemic and at long-term follow up. <sup>6-8</sup> Exposure to infectious disease outbreaks and elevated psychological distress have previously been associated with increased sickness rates, absenteeism, impaired performance at work, and the development of physical health problems. <sup>9-11</sup> During the current COVID-19 pandemic there has been a global media focus on health and care workers with widespread public support. <sup>12</sup> However, there is increasing recognition amongst key opinion leaders and psychological societies that the COVID-19 pandemic will lead to an unparalleled, though as yet unquantified, impact upon the psychological wellbeing of healthcare workers. <sup>13,14</sup>

Studies to date evaluating psychological wellbeing in frontline clinicians during infectious disease outbreaks (including COVID-19) demonstrate negative impacts may be significant. <sup>9,15,16</sup> Systematic reviews and meta-analyses converge around common predictors of psychological distress following traumatic events, many of which are relevant to frontline clinicians. Key factors include preparedness, training, social and occupational support, exposure and threat to life, media use and history of mental health problems. <sup>1,7,16-18</sup> However, these data have largely been collected as a snapshot either during or following outbreaks or as cross-sectional surveys in highly selected or self-selecting cohorts. Longitudinal data which describe evolving and cumulative effects on the psychological wellbeing of frontline working during the COVID-19 pandemic are therefore urgently required. Such studies are essential to understand and mitigate psychological impacts of future events upon this vital workforce and inform the development of policy and interventions.

The primary aim of this study was to assess the prevalence and degree of psychological distress and trauma in doctors providing frontline care during the acceleration, peak and deceleration phases of the COVID-19 pandemic. We also sought to establish which personal and professional factors are were significantly associated with psychological distress at these time points.

## Methods

### Study Design and Participants

The “COVID-19 Emergency Response Assessment (CERA) Study” was a prospective online longitudinal survey of frontline doctors across the UK and Ireland undertaken during the acceleration, peak and deceleration phases of the first COVID-19 pandemic wave.<sup>19</sup> Doctors of all grades working in EM, Anaesthetics or ICM during the acceleration phase were invited to participate.

### Procedures

This survey study is reported in line with Checklist for Reporting Results of Internet E-surveys (CHERRIES) guidelines.<sup>20</sup> Full details of survey distribution, design, administration, and time-points are available in the published protocol.<sup>19</sup> In brief, the survey was initially distributed during the acceleration phase of the first pandemic wave through existing trainee research networks, training faculties or Royal College Networks via email or instant messaging groups, coordinated by identified site/region leads. The participation link was not shared on wider social media platforms, to avoid international contamination. At completion of the acceleration phase survey, participants entered personal email addresses for direct approach at peak and deceleration phases with a unique survey link to avoid duplication. The study was registered at the ISRCTN (10666798).

The acceleration, peak and deceleration surveys were developed iteratively by the study team and underpinned by evidence, or by consensus where necessary. Psychometric tools were selected by consensus of the study team, considering validity and utility of a range of standardised measures, balanced against the feasibility of delivery and completion by individuals likely to be working at maximum capacity.

Study data were collected and managed using REDCap (Research Electronic Data Capture) hosted at University Hospitals Bristol and Weston NHS Foundation Trust.<sup>21,22</sup> Acceleration, peak and deceleration phases were defined a priori and adapted from the United States Centre for Disease Control “Preparedness and Response Frameworks for Influenza Pandemics”.<sup>23</sup> For each survey, exact survey distribution dates were decided per protocol by team consensus according to available public health data on number of confirmed cases (acceleration phase; UK: 18/03/2020 – 26/03/2020, Ireland: 25/03/2020 – 02/04/2020), nationally available COVID-19 daily death rates (peak phase; UK: 21/04/2020 – 05/05/2020, Ireland: 28/04/2020 – 12/05/2020) and at 30 days after distribution of the peak phase survey (deceleration phase; UK: 03/06/2020 – 17/06/2020, Ireland: 10/06/2020 – 24/06/2020). Ethical approval was obtained from the University of Bath (UK) and Children’s Health Ethics Committee (Ireland). Regulatory approval was obtained from the Health Regulation Authority (UK), Health and Care Research Wales. Participants provided electronic informed consent for each survey.

### Survey Questions



1  
2  
3 Personal and professional characteristics relating to participants' current role, and their preparedness  
4 and experiences during the pandemic were collected, alongside the General Health Questionnaire-12  
5 (GHQ-12; provided with licence fee waived by GL Assessments, London, UK) for distress, and the  
6 Impact of Events- Revised (IES-R; off licence) for trauma. Ancillary personal and professional  
7 characteristics collected are provided in full in the protocol and online supplement.<sup>19</sup>  
8  
9

## 10 11 12 **Outcomes**

13 There were two co-primary outcomes in this survey: psychological distress and trauma as defined by  
14 the GHQ-12 and the IES-R respectively.  
15

### 16 17 **Distress – GHQ-12**

18 The GHQ-12 is a 12-item self-report measure devised to screen for psychological distress in the general  
19 population.<sup>24</sup> The measure has high specificity and sensitivity, with reliability demonstrated across a  
20 range of populations.<sup>25,26</sup> The GHQ-12 has been used in similar clinician-based studies measuring the  
21 psychological impact of infectious outbreaks and was chosen due to the brevity of the measure and its  
22 suitability for time-pressured medical staff.<sup>16</sup> The GHQ-12 assesses current state and asks the  
23 participants to compare to usual state. GHQ-12 was asked at all 3 survey phases.  
24  
25  
26  
27

### 28 29 **Trauma – IES-R**

30 The IES-R is a 22-item measure commonly used to measure post-traumatic stress following a pre-  
31 specified traumatic incident and has been used to evaluate the impact of infectious disease outbreaks  
32 on hospital staff.<sup>16,27</sup> IES-R was used at the peak and deceleration survey phases.  
33  
34

35  
36 The secondary outcomes captured included personal and professional characteristics and their  
37 association with psychological distress and trauma.  
38

## 39 40 **Statistical Analysis**

41 The statistical analysis is described in detail in the published protocol.<sup>19</sup> GHQ-12 items were reported  
42 using two methods. In the first method, item responses are assigned to the values 0, 0, 1, 1 (from the  
43 most positive to the most negative sentiment) and summed to form an aggregate score from zero (least  
44 distressed) to 12 (most distressed). Using this method, a score of more than 3 is indicative of case-level  
45 distress.<sup>25</sup> The second method assigns responses to 0, 1, 2, 3 (positive to negative sentiment)  
46 producing a score in the range 0 to 36, with zero representing the most healthy response (no  
47 psychological distress) and 36 the most unhealthy (maximal psychological distress).  
48  
49  
50  
51

52  
53 IES-R responses were analysed by assigning the responses to 0, 1, 2, 3, 4 (positive to negative)  
54 producing a score in the range 0 (no trauma) to 88 (maximal trauma). A score of 24 or above indicates  
55 a clinically significant traumatic stress response, a score above 33 indicates best cut-off for a diagnosis  
56 of 'probable post-traumatic stress disorder' (PTSD).<sup>28,29</sup>  
57  
58  
59  
60

1  
2  
3 The change over time in the GHQ-12 (phases 1, 2, and 3) and IES-R scores (phases 2 and 3) amongst  
4 participants who responded to all three surveys was examined with a repeated measures linear mixed-  
5 effect model, with survey phase as a fixed effect and a participant-level random effect.  
6  
7

8  
9 To identify potential modifiers of the change in GHQ-12-score or IES-R-score over time, further models  
10 each with a single additional covariate were constructed, including an interaction term with survey  
11 phase. Responses where the covariate value was missing were removed.<sup>30</sup> Nagakawa's marginal R<sup>2</sup>  
12 was used to measure the proportion of outcome variance accounted for by the model (excluding  
13 random-effects, i.e., when there is no a-priori knowledge of the expected outcome for each participant).  
14 Values vary from 0 to 1, with 1 occurring when the model perfectly predicts the outcome, and 0 occurring  
15 when the model only returns the population average.  
16  
17  
18

### 19 20 **Software**

21 All analyses and statistical outputs were produced in the statistical programming language  
22 R and the 'tidyverse', 'lme4' and 'ggeffects' packages were used for the mixed-effects models.<sup>31-33</sup>  
23  
24  
25

### 26 **Patient and Public Involvement**

27 The study team contains frontline doctors from all represented specialties who undertook clinical work  
28 throughout the COVID-19 pandemic. This research is in line with recent RCEM research prioritisation  
29 and research recommendations.<sup>34,35</sup>  
30  
31  
32

### 33 **Role of the funding source**

34 The sponsor and funder had no role at any stage of this work.  
35  
36  
37  
38  
39  
40  
41  
42  
43  
44  
45  
46  
47  
48  
49  
50  
51  
52  
53  
54  
55  
56  
57  
58  
59  
60

## Results

Distribution across networks in UK and Ireland generated 5440 responses. Follow-up responses from the peak and deceleration surveys were 3896 (71.6%) and 3079 (56.6%) respectively (figure 1). The final analysis cohort was 3079 participants, consisting of 1686 (54.8%) from EM, 1114 (36.2%) from Anaesthetics and 526 (17.1%) from ICM, with some participants working across multiple specialities.

The demographic and professional characteristics of the respondent population are summarised in Table 1. The cohort was 51.0% female, within a median age group of 36-40 years, and was representative of all professional grades. Respondents were, 63.7%, 'White British', 6.2% 'Irish' and 30.1% 'Ethnic Minority'; a full breakdown of ethnicity is provided in the online supplementary hub (<https://github.com/wjchulme/TERN-CERA-study/tree/main/outputs>).<sup>36,37</sup>

**Table 1 Demographic and occupational characteristics of responders who completed all three study phases**

|                                  | All (N=3079) | Emergency Medicine (N=1686) | Anaesthetics (N=1114) | Intensive Care Medicine (N=526) |
|----------------------------------|--------------|-----------------------------|-----------------------|---------------------------------|
| <b>Age</b>                       |              |                             |                       |                                 |
| 20-25                            | 111 (3.6%)   | 99 (5.9%)                   | 3 (0.3%)              | 9 (1.7%)                        |
| 26-30                            | 737 (24.0%)  | 471 (28.0%)                 | 184 (16.5%)           | 130 (24.8%)                     |
| 31-35                            | 682 (22.2%)  | 366 (21.7%)                 | 242 (21.8%)           | 141 (26.9%)                     |
| 36-40                            | 497 (16.2%)  | 279 (16.6%)                 | 177 (15.9%)           | 81 (15.5%)                      |
| 41-45                            | 406 (13.2%)  | 220 (13.1%)                 | 156 (14.0%)           | 55 (10.5%)                      |
| 46-50                            | 282 (9.2%)   | 128 (7.6%)                  | 133 (12.0%)           | 55 (10.5%)                      |
| 51-55                            | 203 (6.6%)   | 72 (4.3%)                   | 121 (10.9%)           | 27 (5.2%)                       |
| 56-60                            | 107 (3.5%)   | 34 (2.0%)                   | 63 (5.7%)             | 19 (3.6%)                       |
| >60                              | 49 (1.6%)    | 14 (0.8%)                   | 33 (3.0%)             | 7 (1.3%)                        |
| Missing                          | 5            | 3                           | 2                     | 2                               |
| <b>Gender</b>                    |              |                             |                       |                                 |
| Male                             | 1455 (48.8%) | 774 (47.4%)                 | 542 (50.1%)           | 272 (53.8%)                     |
| Female                           | 1522 (51.0%) | 855 (52.4%)                 | 538 (49.7%)           | 233 (46.0%)                     |
| Other                            | 7 (0.2%)     | 4 (0.2%)                    | 2 (0.2%)              | 1 (0.2%)                        |
| Missing                          | 95           | 53                          | 32                    | 20                              |
| <b>Seniority</b>                 |              |                             |                       |                                 |
| Junior Doctor                    | 1089 (35.4%) | 692 (41.0%)                 | 276 (24.8%)           | 187 (35.6%)                     |
| Middle Grade Doctor              | 660 (21.4%)  | 357 (21.2%)                 | 230 (20.6%)           | 129 (24.5%)                     |
| Other Senior Doctor              | 228 (7.4%)   | 156 (9.3%)                  | 66 (5.9%)             | 34 (6.5%)                       |
| Senior Doctor (Consultant Grade) | 1102 (35.8%) | 481 (28.5%)                 | 542 (48.7%)           | 176 (33.5%)                     |
| <b>Geographical Region</b>       |              |                             |                       |                                 |
| East Midlands                    | 177 (5.7%)   | 78 (4.6%)                   | 84 (7.5%)             | 24 (4.6%)                       |
| East of England                  | 172 (5.6%)   | 87 (5.2%)                   | 70 (6.3%)             | 29 (5.5%)                       |
| London                           | 454 (14.7%)  | 319 (18.9%)                 | 103 (9.2%)            | 42 (8.0%)                       |
| North East                       | 132 (4.3%)   | 68 (4.0%)                   | 47 (4.2%)             | 30 (5.7%)                       |
| North West                       | 334 (10.8%)  | 149 (8.8%)                  | 141 (12.7%)           | 78 (14.8%)                      |
| South East                       | 355 (11.5%)  | 229 (13.6%)                 | 105 (9.4%)            | 48 (9.1%)                       |
| South West                       | 430 (14.0%)  | 208 (12.3%)                 | 167 (15.0%)           | 76 (14.4%)                      |
| West Midlands                    | 183 (5.9%)   | 89 (5.3%)                   | 78 (7.0%)             | 44 (8.4%)                       |
| Yorkshire and the Humber         | 212 (6.9%)   | 90 (5.3%)                   | 102 (9.2%)            | 55 (10.5%)                      |
| Northern Ireland                 | 87 (2.8%)    | 41 (2.4%)                   | 34 (3.1%)             | 20 (3.8%)                       |
| Scotland                         | 253 (8.2%)   | 159 (9.4%)                  | 80 (7.2%)             | 32 (6.1%)                       |
| Wales                            | 92 (3.0%)    | 21 (1.2%)                   | 62 (5.6%)             | 21 (4.0%)                       |

|                            |              |              |             |             |
|----------------------------|--------------|--------------|-------------|-------------|
| <b>Dublin</b>              | 111 (3·6%)   | 82 (4·9%)    | 21 (1·9%)   | 16 (3·0%)   |
| <b>Rest of Ireland</b>     | 87 (2·8%)    | 66 (3·9%)    | 20 (1·8%)   | 11 (2·1%)   |
| <b>Nation</b>              |              |              |             |             |
| <b>England</b>             | 2449 (79·5%) | 1317 (78·1%) | 897 (80·5%) | 426 (81·0%) |
| <b>Northern Ireland</b>    | 87 (2·8%)    | 41 (2·4%)    | 34 (3·1%)   | 20 (3·8%)   |
| <b>Republic of Ireland</b> | 198 (6·4%)   | 148 (8·8%)   | 41 (3·7%)   | 27 (5·1%)   |
| <b>Scotland</b>            | 253 (8·2%)   | 159 (9·4%)   | 80 (7·2%)   | 32 (6·1%)   |
| <b>Wales</b>               | 92 (3·0%)    | 21 (1·2%)    | 62 (5·6%)   | 21 (4·0%)   |
| <b>Ethnicity</b>           |              |              |             |             |
| <b>White British</b>       | 1888 (63·7%) | 949 (58·4%)  | 755 (70·3%) | 338 (67·1%) |
| <b>Irish</b>               | 185 (6·2%)   | 118 (7·3%)   | 51 (4·7%)   | 33 (6·5%)   |
| <b>Ethnic minority</b>     | 893 (30·1%)  | 557 (34·3%)  | 268 (25·0%) | 133 (26·4%) |
| Missing                    | 113          | 62           | 40          | 22          |
| <b>Redeployed</b>          |              |              |             |             |
| <b>Yes</b>                 | 249 (8·1%)   | 47 (2·8%)    | 196 (17·6%) | 20 (3·8%)   |
| <b>No</b>                  | 2824 (91·9%) | 1636 (97·2%) | 916 (82·4%) | 504 (96·2%) |
| Missing                    | 6            | 3            | 2           | 2           |

## Primary Outcomes

### General Health Questionnaire-12

The prevalence of psychological distress, as defined by >3 on the GHQ-12 0-0-1-1 scoring method, was 44·7% (n=1334) in the acceleration survey, 36·9% (n=1098) at peak and 31·5% (n=918) during the deceleration phase. Median GHQ-12 scores were 13·0 (Q1-Q3, 10·0-17·0), 13·0 (Q1-Q3, 9·0-16·0) and 12·0 (Q1-Q3, 9·0-16·0) respectively (figure 2). Median distress scores were higher in the Anaesthetic and ICM cohorts at the acceleration phase when compared to EM but decreased in all three groups throughout the first pandemic wave.

### Impact of Events Scale-Revised

The prevalence of psychological trauma, as defined by a score of >24 on the IES-R, was 23·7% (n=647) at peak and 17·7% (n=484) at deceleration. The prevalence of 'probable PTSD', as defined by a score of >33 was 12·6% (n=343) of respondents at peak and 10·1% (n=276) at deceleration. During the peak phase, prevalence of trauma (>24) was 24·9% (n=378) in EM, 21·5% (n=204) in anaesthetics and 24·9% (n=117) in ICM. Prevalence of 'probable PTSD' (>33) was highest in EM (13·9%, n=211) and ICM (13·6%, n= 64) when compared to Anaesthetics (10·8%, n=103). During the deceleration phase, prevalence of trauma (>24) decreased to 19·7% (n=93) in ICM and 18·7% (n=285) in EM. 'Probable PTSD' (>33) decreased to 11·1% (n=169) in EM, when compared to 10·8% (n=51) in ICM and 8·8% (n=85) in Anaesthetics. The median IES-R was highest in the peak survey at 13 (Q1-Q3, 5-24), and 9 (Q1-Q3, 2-19) in the deceleration survey (see table 2 and figure 3).

**Table 2. GHQ-12 and IES-R Scores for participants who responded to all 3 survey phases**

|                             | All (N=3079) | Emergency Medicine (N=1686) | Anaesthetics (N=1114) | Intensive Care Medicine (N=526) |
|-----------------------------|--------------|-----------------------------|-----------------------|---------------------------------|
| <b>Acceleration</b>         |              |                             |                       |                                 |
| <b>GHQ-12 (0-123 score)</b> |              |                             |                       |                                 |
| Mean                        | 13·7         | 13·3                        | 14·4                  | 14·0                            |

|                             |                   |                   |                   |                   |
|-----------------------------|-------------------|-------------------|-------------------|-------------------|
| Median (Q1, Q3)             | 13·0 (10·0, 17·0) | 13·0 (10·0, 16·0) | 14·0 (11·0, 18·0) | 14·0 (10·2, 17·0) |
| <b>GHQ-12 (0011 &gt; 3)</b> |                   |                   |                   |                   |
| > 3                         | 1334 (44·7%)      | 667 (40·7%)       | 542 (50·2%)       | 253 (49·6%)       |
| N-Missing                   | 92                | 48                | 34                | 16                |
| <b>Peak</b>                 |                   |                   |                   |                   |
| <b>GHQ-12 (0123 score)</b>  |                   |                   |                   |                   |
| Mean                        | 13·2              | 12·8              | 13·6              | 13·6              |
| Median (Q1, Q3)             | 13·0 (9·0, 16·0)  | 12·0 (9·0, 16·0)  | 13·0 (10·0, 17·0) | 13·0 (10·0, 17·0) |
| <b>GHQ-12 (0011 &gt; 3)</b> |                   |                   |                   |                   |
| > 3                         | 1098 (36·9%)      | 543 (33·3%)       | 454 (42·3%)       | 211 (41·1%)       |
| N-Missing                   | 105               | 56                | 40                | 13                |
| <b>IES-R score</b>          |                   |                   |                   |                   |
| Mean                        | 16·3              | 16·7              | 15·8              | 17·2              |
| Median (Q1, Q3)             | 13·0 (5·0, 24·0)  | 13·0 (5·0, 24·0)  | 13·0 (6·0, 23·0)  | 14·0 (6·0, 24·0)  |
| <b>IES-R &gt; 24</b>        |                   |                   |                   |                   |
| IES-R-0123 > 24             | 647 (23·7%)       | 378 (24·9%)       | 204 (21·5%)       | 117 (24·9%)       |
| <b>IES-R &gt; 33</b>        |                   |                   |                   |                   |
| IES-R-0123 > 33             | 343 (12·6%)       | 211 (13·9%)       | 103 (10·8%)       | 64 (13·6%)        |
| N-Missing                   | 349               | 165               | 163               | 57                |
| <b>Deceleration</b>         |                   |                   |                   |                   |
| <b>GHQ-12 (0123 score)</b>  |                   |                   |                   |                   |
| Mean                        | 12·9              | 12·8              | 13·0              | 13·1              |
| Median (Q1, Q3)             | 12·0 (9·0, 16·0)  | 12·0 (9·0, 16·0)  | 12·0 (9·0, 16·0)  | 12·0 (9·0, 17·0)  |
| <b>GHQ-12 (0011 &gt; 3)</b> |                   |                   |                   |                   |
| > 3                         | 918 (31·5%)       | 486 (30·2%)       | 340 (32·6%)       | 172 (34·6%)       |
| N-Missing                   | 165               | 78                | 71                | 29                |
| <b>IES-R score</b>          |                   |                   |                   |                   |
| Mean                        | 13·2              | 13·6              | 12·6              | 14·2              |
| Median (Q1, Q3)             | 9·0 (2·0, 19·0)   | 9·0 (2·0, 20·0)   | 8·0 (2·0, 18·0)   | 9·0 (3·0, 20·0)   |
| <b>IES-R &gt; 24</b>        |                   |                   |                   |                   |
| IES-R-0123 > 24             | 484 (17·7%)       | 285 (18·7%)       | 159 (16·5%)       | 93 (19·7%)        |
| <b>IES-R &gt; 33</b>        |                   |                   |                   |                   |
| IES-R-0123 > 33             | 276 (10·1%)       | 169 (11·1%)       | 85 (8·8%)         | 51 (10·8%)        |
| N-Missing                   | 344               | 164               | 153               | 53                |

## Secondary Outcomes

### Risk Factors for Psychological Distress (GHQ-12) and Trauma (IES-R)

The overall strength of the relationship between participant factors and the two outcome measures, psychological distress and trauma, is summarised using Nagakawa's marginal  $R^2$  (figures 4+5). The form of these univariable relationships is described graphically for the five variables with the highest  $R^2$  values in figures 6 a-f. Graphs for the remaining variables are reported in online supplementary hub (<https://github.com/wjchulme/TERN-CERA-study/tree/main/outputs>).

### Personal and Professional variables predicting distress (GHQ-12)

Worry of infecting family members due to clinical work ( $R^2 = 0·06$ ) and worry of personal infection ( $R^2 = 0·05$ ) were the two variables most strongly associated with distress. Figures 6a and 6b report the mean GHQ-12-score for the levels within this variable. Those that were 'extremely worried' about infecting family had a mean GHQ-12-modelled score of 15·3 (95% CI, 15·0, 15·6), 15·1 (95% CI, 14·8, 15·5) and

1  
2  
3 14.6 (95% CI, 14.3, 15.0) during the acceleration, peak and deceleration respectively, compared with  
4 mean scores of 13.7, 13.2 and 12.9 respectively for all participants. For those who were 'extremely  
5 worried' about personal infection, the mean GHQ-12 modelled score was 16.6 (95% CI, 16.1, 17.1)  
6 during the acceleration period, compared with 10.9 (95% CI, 9.7, 12.1) for those who were 'not worried  
7 at all' about being infected. For the mean GHQ-12 modelled score for each of the other variables see  
8 the online link for the figures and values ([https://github.com/wjchulme/TERN-CERA-](https://github.com/wjchulme/TERN-CERA-study/tree/main/outputs)  
9 study/tree/main/outputs).

### 14 **Personal and Professional variables predicting trauma (IES-R)**

15 For trauma, worry of infection of family members due to clinical role had the highest  $R^2$  value ( $R^2=0.10$ ).  
16 Mean IES-R modelled score for those who were 'extremely worried' about infecting family was 23.0  
17 (95% CI, 22.2, 23.8) during the peak compared to 10.0 (95% CI, 7.8, 12.2) for those who were 'not  
18 worried at all' during the peak (Fig 6c). This is significantly higher than the reported mean IES-R overall  
19 of 16.3.

20 Concern that COVID-19 would exacerbate symptoms of an established mental health condition ( $R^2 =$   
21 0.06) had the second highest  $R^2$  value. Peak IES-R mean modelled scores were 23.3 (95% CI, 22.1,  
22 24.4) in those who agreed with this statement compared to 15.2 (95% CI, 14.7, 15.7) in those who  
23 disagreed. Deceleration mean IES-R modelled scores remained high for those who agreed, 22.3 (95%  
24 CI, 21.1, 23.6). (Figure 6d)

25 Worry relating to personal infection due to clinical role ( $R^2 = 0.06$ ) was again strongly associated with  
26 trauma. Figure 6e displays the mean IES-R modelled scores and demonstrates the peak (24.0 (95%  
27 CI, 22.5, 25.4)) and deceleration (20.3 (95% CI, 18.7, 21.8)) outcomes in participants who were  
28 'extremely worried' compared to those who were 'not worried at all' during the peak (11.3 (95% CI 8.6,  
29 14.0)) and deceleration (10.0 (95% CI 8.0, 12.0)).

30 Whilst ethnicity was not strongly associated with distress, it was a stronger predictor of trauma ( $R^2 =$   
31 0.03). Mean modelled trauma scores for 'Ethnic Minority' participants at peak was 18.8 (95% CI, 17.8,  
32 19.8), compared to 'White British' participants of 15.1 (95% CI, 14.5, 15.8). (Figure 6f) For the mean  
33 IES-R modelled scores for each of the other variables see online link for the figures and values.  
34 (<https://github.com/wjchulme/TERN-CERA-study/tree/main/outputs>)

### 35 **Incidence of self-reported COVID-19 infection and isolation**

36 By the deceleration phase of the pandemic 6.9% (n=212) of respondents had received a positive  
37 diagnosis of COVID-19 and 0.4% (n=12) had been admitted to hospital. A positive diagnosis did not  
38 have a significant effect in prediction of trauma ( $R^2=0.014$ ).

### 39 **Regional and national variation of psychological distress and trauma**

1  
2  
3 The region in which participants worked was more valuable for predicting trauma ( $R^2 = 0.034$ ), than for  
4 distress ( $R^2 = 0.016$ ). The mean modelled score of the different regions within the UK and Republic of  
5 Ireland on IES-R is demonstrated in figure 7.  
6  
7

### 8 9 **Drop-out by GHQ-12 and IES-R**

10 Response rate for the peak and deceleration surveys was 69.2% and 54.9% respectively. There was  
11 no significant difference in either the GHQ-12 or IES-R scores between those who dropped out and  
12 those who remained in the study (see online supplement).  
13  
14

### 15 16 **Discussion**

17 In this prospective longitudinal survey of 5440 frontline doctors, the prevalence of psychological distress  
18 and trauma peaked at 44.7% and 23.7% respectively - these figures were substantially higher than for  
19 the general population.<sup>38</sup> For psychological distress, rates declined through peak and deceleration  
20 phases of the first wave to a level comparable to pre-pandemic levels.<sup>39</sup> Prevalence of 'probable PTSD'  
21 was 12.6% at peak and 10.1% at deceleration, demonstrating a degree of natural recovery.<sup>40,41</sup>  
22 However, just less than a quarter experienced sub-threshold post-trauma symptoms 30 days following  
23 the pandemic peak.  
24  
25  
26  
27  
28

29 Personal factors were the most powerful predictors of both psychological distress and trauma. The most  
30 significant predictors relate to familial safety; personal safety and established mental health conditions.  
31 These findings support aggregated data in recent reviews and meta-analyses on the key predictors of  
32 psychological distress in disaster or infectious outbreak settings.<sup>1,7,16-18</sup> However, it cannot be ignored  
33 that the psychological harm associated with both familial and personal safety may potentially be  
34 explained by the perceived (and reported) inadequate provision of PPE to frontline workers.<sup>42,43</sup> This  
35 is an area where improvements must be made in order to mitigate against future physical and  
36 psychological harms that novel pathogens present.  
37  
38  
39  
40  
41

42 While most findings are consistent with existing research, our study also identifies ethnicity as a novel,  
43 key predictor of trauma.<sup>44-46</sup> This is unsurprising given higher rates of reported mortality in ethnic  
44 minority groups with this particular pandemic.<sup>47</sup> However the nature and direction of relationship  
45 between these risk factors and poorer outcomes is undoubtedly complex. Ongoing work continues to  
46 seek further understanding in this area.<sup>48</sup>  
47  
48  
49  
50

51 Rates of trauma were high across all three specialty groups. One in four doctors met clinical threshold,  
52 with the highest rates seen in EM and ICM. This is likely explained by their clinical roles during the  
53 pandemic, in which they were exposed to a higher volume of COVID-19 positive patients compared to  
54 Anaesthetic colleagues. However, it is important to note that the rate of trauma seen in Anaesthetics  
55 was also of concern. At the deceleration phase, EM doctors had higher rates of 'probable PTSD' (IES-  
56 R >33), whereas ICM doctors had a higher prevalence of trauma (IES-R >24). This may reflect the later  
57  
58  
59  
60

1  
2  
3 peak in ICUs when compared to EM<sup>49</sup> or the potential impact of downstream mortality and further work  
4 should explore longer term outcomes in all cohorts.  
5  
6

7 It is evident from the longitudinal data that vulnerability to poorer psychological outcomes may be  
8 predicted by certain characteristics and therefore potentially mitigated through targeted intervention.  
9 Studies examining psychiatric outcomes in SARS reflect that psychological distress is likely to persist;  
10 identification and intervention must begin now.<sup>8,9,50,51</sup> Without appropriate support and intervention  
11 doctors are likely to experience long-term effects on mental health, resulting in increased sickness rates,  
12 absenteeism, impaired performance at work, and the development of physical health problems.<sup>8,9,11,52,53</sup>  
13 Therefore the early identification of ongoing psychological distress will be pivotal in influencing the  
14 longer-term mental health of frontline workers. Based on research from COVID-19 and other  
15 pandemics, we can be certain that rates and severity of distress will rise following this second wave of  
16 the pandemic. We now know that doctors are working on the frontline while carrying the heavy burden  
17 of fear of infecting themselves, or critically, family members, while some continue to battle high levels  
18 of psychological distress. This distress was evident in the lead up to the first peak, but sustained well  
19 beyond this time point. Doctors are continuing to work in very high pressured, high risk environments  
20 with a significant proportion doing so despite clinical levels of distress. Policymakers and professional  
21 bodies should urgently seek to develop an overarching 'best practice' pathway to support healthcare  
22 staff in these environments.  
23  
24  
25  
26  
27  
28  
29  
30  
31

32 While various interventions are recommended specifically for frontline workers there is common  
33 agreement in the necessity for basic psychosocial interventions (i.e. sleep hygiene, exercise, health  
34 behaviour) to facilitate return to equilibrium<sup>54-57</sup>, yet these measures are not always sufficient to  
35 ameliorate persistent distress. It is crucial that an overarching 'best practice' pathway and package of  
36 care is implemented to help support staff now and for the future. This must be multilevel, evidence-  
37 based, and should include (a) mobilisation of formal peer & organisational support structures, (b)  
38 mechanisms for recognising and monitoring distress, and (c) offer clear referral pathways to evidence-  
39 based interventions. Access to appropriate psychological support is imperative; cognitive behavioural  
40 therapy is recommended by the National Institute for health and Care Excellence (NICE) to ameliorate  
41 anxiety, depression and PTSD<sup>58,59</sup> however further work is needed to ensure these interventions this  
42 are suitably tailored to the practicalities of shift work and the unique experiences faced by frontline  
43 clinicians. With this, there is a responsibility to ensure equality in the provision of care and pathways  
44 to access, for this is likely to be necessary for many.  
45  
46  
47  
48  
49  
50  
51

### 52 **Strengths and Weaknesses**

53 This is a large-scale longitudinal study examining prevalence of psychological distress in doctors in the  
54 UK and Ireland, offering a robust and reliable measure of the impact of COVID-19 on the mental health  
55 of frontline doctors, and allows comparison with other pandemic mental health trajectories. Due to the  
56 three-phase prospective design and extent of data collected, findings from this study can be reliably  
57  
58  
59  
60



1  
2  
3 used to inform the development of preparations and interventions to mitigate the impact of COVID-19  
4 and future infectious disease outbreaks on mental health in frontline doctors.  
5  
6

7 While the protocol was closely adhered to, variation in regional peaks may have influenced accurate  
8 capturing of psychological distress and trauma rates. It is noted that whilst the acceleration phase is  
9 study 'baseline', as the pandemic was present and proliferating in the UK at the acceleration phase, it  
10 more accurately represents the initial stress associated with a rapidly spreading highly infectious virus  
11 of unknown pathogenic origins and no effective treatment; a reasonable response to the context. Finally,  
12 further follow up of frontline doctors would allow insight into whether mental health trajectories are  
13 similar to other infectious disease pandemics.  
14  
15  
16  
17  
18

### 19 **Conclusion**

20 Our findings reflect a pattern of elevated distress during the acceleration and peak phase of the  
21 current pandemic, some degree of natural recovery and a significant minority continuing to experience  
22 residual ongoing distress. It is essential that policymakers and professional bodies seek to prevent  
23 future adverse effects through provision of vital equipment to mitigate both physical and psychological  
24 harm and the development of clear pathways to effective psychological care. Moving forward, it is  
25 essential the COVID-19 pandemic serves as a foundation for significant development and growth in  
26 all of these areas.  
27  
28  
29  
30  
31

### 32 **References**

- 33 1 Brooks SK, Dunn R, Sage CAM, Amlôt R, Greenberg N, Rubin GJ. Risk and resilience factors  
34 affecting the psychological wellbeing of individuals deployed in humanitarian relief roles after a  
35 disaster. *J. Ment. Heal.* 2015. DOI:10.3109/09638237.2015.1057334.
- 36 2 Liu Q, Luo D, Haase JE, *et al.* The experiences of health-care providers during the COVID-19  
37 crisis in China: a qualitative study. *Lancet Glob Heal* 2020. DOI:10.1016/S2214-  
38 109X(20)30204-7.
- 39 3 McCabe R, Schmit N, Christen P, *et al.* Adapting hospital capacity to meet changing demands  
40 during the COVID-19 pandemic. *BMC Med* 2020. DOI:10.1186/s12916-020-01781-w.
- 41 4 Phua J, Weng L, Ling L, *et al.* Intensive care management of coronavirus disease 2019  
42 (COVID-19): challenges and recommendations. *Lancet Respir. Med.* 2020.  
43 DOI:10.1016/S2213-2600(20)30161-2.
- 44 5 Kursumovic E, Lennane S, Cook TM. Deaths in healthcare workers due to COVID-19: the  
45 need for robust data and analysis. *Anaesthesia* 2020; **75**: 989–92.
- 46 6 Maunder RG, Lancee WJ, Rourke S, *et al.* Factors associated with the psychological impact of  
47 severe acute respiratory syndrome on nurses and other hospital workers in Toronto.  
48 *Psychosom. Med.* 2004. DOI:10.1097/01.psy.0000145673.84698.18.
- 49 7 Kisely S, Warren N, McMahon L, Dalais C, Henry I, Siskind D. Occurrence, prevention, and  
50 management of the psychological effects of emerging virus outbreaks on healthcare workers:  
51 rapid review and meta-analysis. *BMJ* 2020. DOI:10.1136/bmj.m1642.  
52  
53  
54  
55  
56  
57  
58  
59  
60

- 1  
2  
3 8 Allan SM, Bealey R, Birch J, *et al*. The prevalence of common and stress-related mental health  
4 disorders in healthcare workers based in pandemic-affected hospitals: a rapid systematic  
5 review and meta-analysis. 2020 DOI:10.1101/2020.05.04.20089862.  
6  
7 9 Maunder RG, Lancee WJ, Balderson KE, *et al*. Long-term psychological and occupational  
8 effects of providing hospital healthcare during SARS outbreak. *Emerg Infect Dis* 2006.  
9 DOI:10.3201/eid1212.060584.  
10  
11 10 Fiksenbaum L, Marjanovic Z, Greenglass ER, Coffey S. Emotional exhaustion and state anger  
12 in nurses who worked during the sars outbreak: The role of perceived threat and  
13 organizational support. *Can J Community Ment Heal* 2006. DOI:10.7870/cjcmh-2006-0015.  
14  
15 11 Arora M, Asha S, Chinnappa J, Diwan AD. Review article: Burnout in emergency medicine  
16 physicians. *EMA - Emerg. Med. Australas.* 2013; **25**: 491–5.  
17  
18 12 Clap for Carers: UK in “emotional” tribute to NHS and care workers - BBC News.  
19 <https://www.bbc.co.uk/news/uk-52058013> (accessed Nov 20, 2020).  
20  
21 13 The Lancet. COVID-19: protecting health-care workers. *Lancet.* 2020. DOI:10.1016/S0140-  
22 6736(20)30644-9.  
23  
24 14 Coronavirus: Mental health of NHS staff at long-term risk - BBC News.  
25 <https://www.bbc.co.uk/news/health-52528619> (accessed Nov 20, 2020).  
26  
27 15 Halpern J, Maunder RG, Schwartz B, Gurevich M. Identifying risk of emotional sequelae after  
28 critical incidents. *Emerg Med J* 2011. DOI:10.1136/emj.2009.082982.  
29  
30 16 Brooks SK, Dunn R, Amlôt R, Rubin GJ, Greenberg N. A Systematic, Thematic Review of  
31 Social and Occupational Factors Associated with Psychological Outcomes in Healthcare  
32 Employees during an Infectious Disease Outbreak. *J Occup Environ Med* 2018.  
33 DOI:10.1097/JOM.0000000000001235.  
34  
35 17 Lancee WJ, Maunder RG, Goldbloom DS. Prevalence of psychiatric disorders among Toronto  
36 hospital workers one to two years after the SARS outbreak. *Psychiatr Serv* 2008.  
37 DOI:10.1176/ps.2008.59.1.91.  
38  
39 18 Ozer EJ, Best SR, Lipsey TL, Weiss DS. Predictors of posttraumatic stress disorder and  
40 symptoms in adults: A meta-analysis. *Psychol. Bull.* 2003; **129**: 52–73.  
41  
42 19 Roberts T, Daniels J, Hulme W, *et al*. COVID-19 emergency response assessment study: a  
43 prospective longitudinal survey of frontline doctors in the UK and Ireland: study protocol. *BMJ*  
44 *Open* 2020. DOI:10.1136/bmjopen-2020-039851.  
45  
46 20 Eysenbach G. Improving the Quality of Web Surveys: The Checklist for Reporting Results of  
47 Internet E-Surveys (CHERRIES). *J Med Internet Res* 2004; **6**: e34.  
48  
49 21 Harris PA, Taylor R, Minor BL, *et al*. The REDCap consortium: Building an international  
50 community of software platform partners. *J Biomed Inform* 2019; **95**: 103208.  
51  
52 22 Harris PA, Taylor R, Thielke R, Payne J, Gonzalez N, Conde JG. Research electronic data  
53 capture (REDCap)—A metadata-driven methodology and workflow process for providing  
54 translational research informatics support. *J Biomed Inform* 2009; **42**: 377–81.  
55  
56 23 Holloway R, Rasmussen SA, Zaza S, Cox N, Jernigan D. Updated Preparedness and  
57 Response Framework for Influenza Pandemics. 2014.  
58  
59  
60

- 1  
2  
3 <https://www.cdc.gov/mmwr/preview/mmwrhtml/rr6306a1.htm> (accessed April 8, 2020).
- 4 24 Goldberg D, Williams P. A user's guide to the General Health Questionnaire. London: GL  
5 Assessment, 1988.
- 6  
7 25 Goldberg DP, Gater R, Sartorius N, *et al*. The validity of two versions of the GHQ in the WHO  
8 study of mental illness in general health care. *Psychol Med* 1997.  
9 DOI:10.1017/S0033291796004242.
- 10  
11 26 Goldberg DP, Oldehinkel T, Ormel J. Why GHQ threshold varies from one place to another.  
12 *Psychol Med* 1998. DOI:10.1017/S0033291798006874.
- 13  
14 27 Christianson S, Marren J. The Impact of Event Scale - Revised (IES-R). *Medsurg Nurs* 2012.
- 15  
16 28 Asukai N, Kato H, Kawamura N, *et al*. Reliability and validity of the Japanese-language version  
17 of the Impact of Event Scale-Revised (IES-R-J): Four studies of different traumatic events. *J*  
18 *Nerv Ment Dis* 2002. DOI:10.1097/00005053-200203000-00006.
- 19  
20 29 Creamer M, Bell R, Failla S. Psychometric properties of the Impact of Event Scale - Revised.  
21 *Behav Res Ther* 2003. DOI:10.1016/j.brat.2003.07.010.
- 22  
23 30 Nakagawa S, Johnson PCD, Schielzeth H. The coefficient of determination R<sup>2</sup> and intra-class  
24 correlation coefficient from generalized linear mixed-effects models revisited and expanded. *J*  
25 *R Soc Interface* 2017. DOI:10.1098/rsif.2017.0213.
- 26  
27 31 Wickham H, Averick M, Bryan J, *et al*. Welcome to the Tidyverse. *J Open Source Softw* 2019;  
28 4: 1686.
- 29  
30 32 Bates D, Mächler M, Bolker BM, Walker SC. Fitting linear mixed-effects models using lme4. *J*  
31 *Stat Softw* 2015. DOI:10.18637/jss.v067.i01.
- 32  
33 33 Lüdtke D. ggeffects: Tidy Data Frames of Marginal Effects from Regression Models. *J Open*  
34 *Source Softw* 2018; 3: 772.
- 35  
36 34 Smith J, Keating L, Flowerdew L, *et al*. An Emergency Medicine Research Priority Setting  
37 Partnership to establish the top 10 research priorities in emergency medicine. *Emerg Med J*  
38 2017. DOI:10.1136/emermed-2017-206702.
- 39  
40 35 Cottey L, Roberts T, Graham B, *et al*. Need for recovery amongst emergency physicians in the  
41 UK and Ireland: a cross-sectional survey. *BMJ Open* 2020.
- 42  
43 36 Khunti K, Routen A, Pareek M, Treweek S, Platt L. The language of ethnicity. *BMJ* 2020; 371:  
44 m4493.
- 45  
46 37 Bunglawala Z (Race DU, Office) C. Please, don't call me BAME or BME! 2019.  
47 <https://civilservice.blog.gov.uk/2019/07/08/please-dont-call-me-bame-or-bme/> (accessed Oct  
48 12, 2020).
- 49  
50 38 Rettie H, Daniels J. Coping and Tolerance of Uncertainty: Predictors and Mediators of Mental  
51 Health During the COVID-19 Pandemic. *Am Psychol* 2020. DOI:10.1037/amp0000710.
- 52  
53 39 Kinman G, Teoh K. What could make a difference to the mental health of UK doctors? A  
54 review of the research evidence. 2018.
- 55  
56 40 Morina N, Wicherts JM, Lobrecht J, Priebe S. Remission from post-traumatic stress disorder  
57 in adults: A systematic review and meta-analysis of long term outcome studies. *Clin. Psychol.*  
58 *Rev.* 2014. DOI:10.1016/j.cpr.2014.03.002.
- 59  
60

- 1  
2  
3 41 Kessler RC, Sonnega A, Bromet E, Hughes M, Nelson CB. Posttraumatic Stress Disorder in  
4 the National Comorbidity Survey. *Arch Gen Psychiatry* 1995.  
5 DOI:10.1001/archpsyc.1995.03950240066012.  
6  
7 42 McKee M. England's PPE procurement failures must never happen again. *BMJ*. 2020.  
8 DOI:10.1136/bmj.m2858.  
9  
10 43 Godlee F. Covid-19: weathering the storm. *BMJ* 2020; **368**: m1199.  
11  
12 44 Chew NWS, Lee GKH, Tan BYQ, *et al*. A multinational, multicentre study on the psychological  
13 outcomes and associated physical symptoms amongst healthcare workers during COVID-19  
14 outbreak. *Brain Behav Immun* 2020. DOI:10.1016/j.bbi.2020.04.049.  
15  
16 45 Berger W, Coutinho ESF, Figueira I, *et al*. Rescuers at risk: A systematic review and meta-  
17 regression analysis of the worldwide current prevalence and correlates of PTSD in rescue  
18 workers. *Soc. Psychiatry Psychiatr. Epidemiol.* 2012. DOI:10.1007/s00127-011-0408-2.  
19  
20 46 Perrin MA, DiGande L, Wheeler K, Thorpe L, Farfel M, Brackbill R. Differences in PTSD  
21 prevalence and associated risk factors among World Trade Center disaster rescue and  
22 recovery workers. *Am J Psychiatry* 2007. DOI:10.1176/appi.ajp.2007.06101645.  
23  
24 47 Coronavirus (COVID-19) related deaths by ethnic group, England and Wales - Office for  
25 National Statistics.  
26 [https://www.ons.gov.uk/peoplepopulationandcommunity/birthsdeathsandmarriages/deaths/arti](https://www.ons.gov.uk/peoplepopulationandcommunity/birthsdeathsandmarriages/deaths/articles/coronavirusrelateddeathsbyethnicgroupenglandandwales/2march2020to10april2020)  
27 [cles/coronavirusrelateddeathsbyethnicgroupenglandandwales/2march2020to10april2020](https://www.ons.gov.uk/peoplepopulationandcommunity/birthsdeathsandmarriages/deaths/articles/coronavirusrelateddeathsbyethnicgroupenglandandwales/2march2020to10april2020)  
28 (accessed Nov 20, 2020).  
29  
30 48 Iacobucci G. Covid-19: Increased risk among ethnic minorities is largely due to poverty and  
31 social disparities, review finds. *BMJ* 2020; **371**. DOI:10.1136/bmj.m4099.  
32  
33 49 Doidge JC, Mouncey PR, Thomas K, *et al*. Trends in Intensive Care for Patients with COVID-  
34 19 in England, Wales and Northern Ireland. 2020; published online Aug 11.  
35 DOI:10.20944/preprints202008.0267.v1.  
36  
37 50 Mak IWC, Chu CM, Pan PC, Yiu MGC, Chan VL. Long-term psychiatric morbidities among  
38 SARS survivors. *Gen Hosp Psychiatry* 2009. DOI:10.1016/j.genhosppsy.2009.03.001.  
39  
40 51 Lee AM, Wong JGWS, McAlonan GM, *et al*. Stress and psychological distress among SARS  
41 survivors 1 year after the outbreak. *Can J Psychiatry* 2007.  
42 DOI:10.1177/070674370705200405.  
43  
44 52 McAlonan GM, Lee AM, Cheung V, *et al*. Immediate and sustained psychological impact of an  
45 emerging infectious disease outbreak on health care workers. *Can J Psychiatry* 2007.  
46 DOI:10.1177/070674370705200406.  
47  
48 53 Stuijzand S, Deforges C, Sandoz V, *et al*. Psychological impact of an epidemic/pandemic on  
49 the mental health of healthcare professionals: A rapid review. *BMC Public Health* 2020; **20**:  
50 1230.  
51  
52 54 Greenberg N, Docherty M, Gnanapragasam S, Wessely S. Managing mental health  
53 challenges faced by healthcare workers during covid-19 pandemic. *BMJ*. 2020.  
54 DOI:10.1136/bmj.m1211.  
55  
56 55 Que J, Shi L, Deng J, *et al*. Psychological impact of the covid-19 pandemic on healthcare  
57  
58  
59  
60

- 1  
2  
3 workers: A cross-sectional study in China. *Gen Psychiatry* 2020. DOI:10.1136/gpsych-2020-  
4 100259.  
5  
6 56 Maben J, Bridges J. Covid-19: Supporting nurses' psychological and mental health. *J. Clin.*  
7 *Nurs.* 2020. DOI:10.1111/jocn.15307.  
8  
9 57 Heath C, Sommerfield A, von Ungern-Sternberg BS. Resilience strategies to manage  
10 psychological distress among healthcare workers during the COVID-19 pandemic: a narrative  
11 review. *Anaesthesia.* 2020. DOI:10.1111/anae.15180.  
12  
13 58 Post-traumatic stress disorder NICE guideline. 2018 [www.nice.org.uk/guidance/ng116](http://www.nice.org.uk/guidance/ng116)  
14 (accessed Nov 23, 2020).  
15  
16 59 Kendrick T, Pilling S. Common mental health disorders - Identification and pathways to care:  
17 NICE clinical guideline. *Br. J. Gen. Pract.* 2012; **62**: 47–9.  
18  
19

### 20 Acknowledgements

21 The views expressed are those of the authors and not necessarily those of the NHS, the NIHR, the  
22 Department of Health or the Royal Colleges involved in survey distribution.

23 The authors would like to acknowledge Mai Baquedano, at the University of Bristol, for her support  
24 with REDCap, GL Assessments for providing the licence for the GHQ-12 free of charge and Simon  
25 O'Hare, Data and Insight Manager, General Medical Council  
26  
27  
28  
29

### 30 Author Contributions

31 The corresponding author attests that all listed authors meet authorship criteria and that no others  
32 meeting the criteria have been omitted. Tom Roberts (TR) conceived the idea for the study. TR, Edd  
33 Carlton (EC), Jo Daniels (JD), Mark Lyttle (ML), and Blair Graham (BG) were responsible for the initial  
34 study design, which was refined with the help of Katie Samuel (KS), Charles Reynard (CR), Robert  
35 Hirst (RH), Michael Barrett (MB) and William Hulme (WH). Expert advice on psychological  
36 assessment scores was provided by JD. WH provided the statistical plan. TR lead the dissemination  
37 of the study in UK Adult Emergency Departments (ED), ML lead the dissemination of the study in UK  
38 and Ireland Paediatric EDs, KS lead the dissemination of the study in UK Anaesthetic and ICU  
39 Departments, MB lead the dissemination of the study in Ireland EDs, along with John Cronin, James  
40 Foley and Etimbuk Umana. Joao Vinagre lead the dissemination in Ireland ICUs and Anaesthetic  
41 Departments. TR coordinated study set-up, finalisation of the study surveys and finalisations of study  
42 protocols. All authors contributed to the final study design and protocol development, critically revised  
43 successive drafts of the manuscript and approved the final version. The study management group is  
44 responsible for the conduct of the study.  
45  
46  
47  
48  
49  
50  
51  
52

### 53 Funding

54 The Chief Investigator is directly funded as a research fellow by the Royal College of Emergency  
55 Medicine. The GHQ-12 is being used under licence from GL assessments; the fee for use of this  
56 instrument within all three surveys has been waived. Dr Carlton is a National Institute for Health  
57 Research Advanced Fellow. The study has direct funding from RCEM. Grant code: G/2020/1.  
58  
59  
60

### Competing interests

Many of the authors have been working as frontline clinicians during the COVID-19 pandemic. They have no competing interests to declare.

### Data Sharing

Deidentified participant data will be made available for 2 years post publication. Requests for access will require HRA and ethical approval and decisions regarding data sharing will be made after discussion with the study senior authors. Statistical code and study figures are available directly from: <https://github.com/wjchulme/TERN-CERA-study/tree/main/outputs>.

### Trainee Emergency Research Network (TERN) Collaborators:

|   |                        |                                          |   |                        |                                             |
|---|------------------------|------------------------------------------|---|------------------------|---------------------------------------------|
| L | Kane                   | Aberdeen Royal Infirmary                 | R | Hannah                 | Royal Alexandra Children's Hospital         |
| L | Mackenzie              | Addenbrooke's Hospital, Cambridge        | A | Corfield               | Royal Alexandra Hospital, Scotland          |
| S | Sharma Hajela          | Addenbrooke's Hospital, Cambridge        | J | Maney                  | Royal Belfast Hospital for Sick Children    |
| J | Phizacklea             | Addenbrooke's Hospital, Cambridge        | D | Metcalfe               | Royal Berkshire Hospital                    |
| K | Malik                  | Addenbrooke's Hospital, Cambridge        | S | Timmis                 | Royal Berkshire Hospital                    |
| N | Mathai                 | Aintree University Hospital              | C | Williams               | Royal Bolton Hospital                       |
| A | Sattout                | Aintree University Hospital              | R | Newport                | Royal Bolton Hospital                       |
| S | Messahel               | Alder Hey Children's Hospital, Liverpool | D | Bawden                 | Royal Cornwall Hospital                     |
| E | Fadden                 | Alder Hey Children's Hospital, Liverpool | A | Tabner                 | Royal Derby Hospital                        |
| R | McQuillan              | Altnagelvin Area Hospital, N. Ireland    | H | Malik                  | Royal Devon and Exeter Hospital             |
| B | O'Hare                 | Antrim Area Hospital, N. Ireland         | C | Roe                    | Royal Devon and Exeter Hospital             |
| P | Turton                 | Arrowe Park Hospital, Merseyside         | D | McConnell              | Royal Devon and Exeter Hospital             |
| S | Lewis                  | Arrowe Park Hospital, Merseyside         | F | Taylor                 | Royal Free London                           |
| D | Bewick                 | Barnsley Hospital                        | R | Ellis                  | Royal Glamorgam Hospital, Wales             |
| R | Taylor                 | Bath Royal United Hospital               | S | Morgan                 | Royal Gwent Hospital, Wales                 |
| I | Hancock                | Bath Royal United Hospital               | L | Barnicott              | Royal Hampshire County Hospital             |
| D | Manthalapo Ramesh Babu | Bedford Hospital, Bedfordshire           | S | Foster                 | Royal Hospital for Children, Glasgow        |
| S | Hartshorn              | Birmingham Children's Hospital           | J | Browning               | Royal Hospital for Sick Children            |
| M | Williams               | Birmingham Children's Hospital           | L | McCrae                 | Royal Hospital for Sick Children, Edinburgh |
| A | Charlton               | Bradford Royal Infirmary                 | E | Godden                 | Royal Infirmary Hospital, Edinburgh         |
| L | Somerset               | Bristol Royal Hospital for Children      | A | Saunders Lawrence-Ball | Royal Infirmary Hospital, Edinburgh         |
| C | Munday                 | Bristol Royal Hospital for Children      | A | Ball                   | Royal Liverpool University Hospital         |
| A | Turner                 | Bristol Royal Hospital for Children      | R | House                  | Royal Liverpool University Hospital         |
| R | Sainsbury              | Bristol Royal Infirmary                  | J | Muller                 | Royal London Hospital                       |
| E | Williams               | Bristol Royal Infirmary                  | I | Skene                  | Royal London Hospital                       |
| S | Patil                  | Chelsea & Westminster Hospital           | M | Lim                    | Royal London Hospital                       |
| R | Stewart                | Chelsea & Westminster Hospital           | H | Millar                 | Royal Manchester Children's Hospital        |
| M | Winstanley             | Chelsea & Westminster Hospital           | A | Rai                    | Royal Manchester Children's Hospital        |
| N | Tambe                  | Chesterfield Royal hospital              | K | Challen                | Royal Preston Hospital                      |
| C | Magee                  | City Hospital, Birmingham                | S | Currie                 | Royal Preston Hospital                      |
| D | Raffo                  | Craigavon Area Hospital, N. Ireland      | M | Elkanzi                | Royal Stoke University Hospital             |
| D | Mawhinney              | Craigavon Area Hospital, N. Ireland      | T | Perry                  | Royal Surrey County Hospital                |
| B | Taylor                 | Cumberland Infirmary, Cumbria            | W | Kan                    | Royal Surrey County Hospital                |

|    |     |             |                                     |    |           |                                          |
|----|-----|-------------|-------------------------------------|----|-----------|------------------------------------------|
| 1  |     |             |                                     |    |           |                                          |
| 2  |     |             |                                     |    |           |                                          |
| 3  |     |             |                                     |    |           |                                          |
| 4  | T   | Hussan      | Darlington Memorial Hospital        | L  | Brown     | Royal Sussex County Hospital             |
| 5  | G   | Pells       | Darlington Memorial Hospital        | M  | Cheema    | Royal Sussex County Hospital             |
| 6  | F   | Barham      | Derriford Hospital, Plymouth        | A  | Clarey    | Royal Victoria Hospital                  |
| 7  | F   | Wood        | Derriford Hospital, Plymouth        | A  | Gulati    | Royal Victoria Infirmary                 |
| 8  | C   | Szekeres    | East Surrey Hospital                | K  | Webster   | Royal Victoria Infirmary                 |
| 9  |     |             |                                     |    |           |                                          |
| 10 | R   | Greenhalgh  | East Surrey Hospital                | A  | Howson    | Salford Royal NHS Foundation Trust       |
| 11 | S   | Marimuthu   | Eastbourne Hospital                 | R  | Doonan    | Salford Royal NHS Foundation Trust       |
| 12 | R   | Macfarlane  | Epsom and St Helier Hospitals       | C  | Magee     | Sandwell Hospital                        |
| 13 | M   | Alex        | Evelina Children's Hospital, London | A  | Trimble   | Sheffield Children's Hospital            |
| 14 | B   | Shrestha    | Frimley Park Hospital               | C  | O'Connell | Sheffield Children's Hospital            |
| 15 | L   | Stanley     | Gloucester Royal Hospital           | R  | Wright    | Southampton General                      |
| 16 | J   | Gumley      | Gloucester Royal Hospital           | E  | Colley    | Southmead Hospital, Bristol              |
| 17 | K   | Thomas      | Gloucester Royal Hospital           | C  | Rimmer    | Southport Hospital, Merseyside           |
| 18 | M   | Anderson    | Great North Children's, Newcastle   | S  | Pintus    | Southport Hospital, Merseyside           |
| 19 | C   | Weegenaar   | Great Western Hospital, Swindon     | H  | Jarman    | St George's Hospital, London             |
| 20 | J   | Lockwood    | Harrogate Hospital                  | V  | Worsnop   | St George's Hospital, London             |
| 21 | T   | Mohamed     | Heartlands's Hospital, Birmingham   | S  | Collins   | St Helier Hospital                       |
| 22 | S   | Ramraj      | Hillingdon Hospital, London         | M  | Colmar    | St John's Hospital, Livingston           |
| 23 | M   | Mackenzie   | Homerton Hospital, London           | N  | Masood    | St John's Hospital, Livingston           |
| 24 | A   | Robertson   | Homerton Hospital, London           | R  | McLatchie | St John's Hospital, Livingston           |
| 25 | W   | Niven       | Homerton Hospital, London           | A  | Peasley   | Stepping Hill Hospital                   |
| 26 | M   | Patel       | Homerton Hospital, London           | S  | Rahman    | Stoke Mandeville Hospital                |
| 27 | S   | Subramaniam | Horton General Hospital, Banbury    | N  | Mullen    | South Tyneside and Sunderland NHS Trust  |
| 28 | C   | Holmes      | Huddersfield Royal Infirmary        | L  | Armstrong | The Royal Berkshire Hospital, Reading    |
| 29 | S   | Bongale     | Inverclyde Royal Hospital           | A  | Hay       | The Whittington Hospital, London         |
| 30 | U   | Bait        | Ipswich Hospital                    | R  | Mills     | The Whittington Hospital, London         |
| 31 | S   | Nagendran   | Ipswich Hospital                    | J  | Lowe      | Torbay Hospital, Devon                   |
| 32 | S   | Rao         | Ipswich Hospital                    | H  | Raybould  | Torbay Hospital, Devon                   |
| 33 | F   | Mendes      | James Paget Hospital                | A  | Ali       | Torbay Hospital, Devon                   |
| 34 | P   | Singh       | John Radcliffe Hospital, Oxford     | P  | Cuthbert  | Ulster Hospital Dundonald, N. Ireland    |
| 35 | S   | Subramaniam | John Radcliffe Hospital, Oxford     | S  | Taylor    | University College London Hospital       |
| 36 | T   | Baron       | John Radcliffe Hospital, Oxford     | V  | Talwar    | University College London Hospital       |
| 37 | C   | Ponmani     | King George Hospital                | Z  | Al-Janabi | University Hospital Ayr, Scotland        |
| 38 | M   | Depante     | King's College Hospital, London     | C  | Leech     | University Hospital Coventry             |
| 39 | R   | Sneep       | King's College Hospital, London     | J  | Turner    | University Hospital Coventry             |
| 40 | A   | Brookes     | King's College Hospital, London     | L  | McKechnie | University Hospital Crosshouse, Scotland |
| 41 | S   | Williams    | King's College Hospital, London     | B  | Mallon    | University Hospital Crosshouse, Scotland |
| 42 | A   | Rainey      | King's College Hospital, London     | J  | McLaren   | University Hospital Crosshouse, Scotland |
| 43 | J   | Brown       | Kingston Hospital, London           | Y  | Moulds    | University Hospital Crosshouse, Scotland |
| 44 | N   | Marriage    | Kingston Hospital, London           | L  | Dunlop    | University Hospital Hairmyres, Scotland  |
| 45 | S   | Manou       | Leeds General Infirmary             | FM | Burton    | University Hospital Hairmyres, Scotland  |
| 46 | S   | Hart        | Leeds General Infirmary             | S  | Keers     | University Hospital Lewisham, London     |
| 47 | M   | Elsheikh    | Leeds General Infirmary             | L  | Robertson | University Hospital Lewisham, London     |
| 48 | L   | Cocker      | Leicester Royal Infirmary           | D  | Craver    | University Hospital Lewisham, London     |
| 49 | MH  | Elwan       | Leicester Royal Infirmary           | N  | Moultrie  | University Hospital Monklands, Scotland  |
| 50 | K L | Vincent     | Leicester Royal Infirmary           | O  | Williams  | University Hospital of North Tees        |

1  
2  
3  
4  
5  
6  
7  
8  
9  
10  
11  
12  
13  
14  
15  
16  
17  
18  
19  
20  
21  
22  
23  
24  
25  
26  
27  
28  
29  
30  
31  
32  
33  
34  
35  
36  
37  
38  
39  
40  
41  
42  
43  
44  
45  
46  
47  
48  
49  
50  
51  
52  
53  
54  
55  
56  
57  
58  
59  
60

|   |            |                                           |   |                     |                                        |
|---|------------|-------------------------------------------|---|---------------------|----------------------------------------|
| C | Nunn       | Leicester Royal Infirmary                 | S | Purvis              | University Hospital of North Tees      |
| N | Sarja      | Lister Hospital, Stevenage                | M | Clark               | University Hospital of North Tees      |
| M | Viegas     | Luton & Dunstable Hospital                | C | Davies              | University Hospital of Wales, Cardiff  |
| E | Wooffinden | Manchester Royal Infirmary                | S | Foreman             | University Hospital of Wales, Cardiff  |
| C | Reynard    | Manchester Royal Infirmary                | C | Ngua                | University Hospital of Wales, Cardiff  |
| N | Cherian    | Manchester Royal Infirmary                | D | George              | University Hospital of Wales, Cardiff  |
| A | Da-Costa   | Medway NHS Foundation Trust               | J | Morgan              | University Hospital of Wales, Cardiff  |
| S | Duckitt    | Medway NHS Foundation Trust               | D | George              | University Hospital of Wales, Cardiff  |
| J | Bailey     | Milton Keynes University Hospital         | N | Hoskins             | University Hospital of Wales, Cardiff  |
| L | How        | Milton Keynes University Hospital         | J | Fryer               | University Hospital Southampton        |
| T | Hine       | Milton Keynes University Hospital         | R | Wright              | University Hospital Southampton        |
| F | Ihsan      | Milton Keynes University Hospital         | L | Frost               | University Hospital Southampton        |
| H | Abdullah   | Milton Keynes University Hospital         | P | Ellis               | University Hospital Southampton        |
| K | Bader      | Milton Keynes University Hospital         | A | Mackay              | University Hospital Wishaw, Scotland   |
| S | Pradhan    | Milton Keynes University Hospital         | K | Gray                | Victoria Hospital, Kirkcaldy, Scotland |
| M | Manoharan  | Milton Keynes University Hospital         | M | Jacobs              | Watford General Hospital               |
| C | Battle     | Morrison Hospital, Wales                  | I | Muslim Veettil Asif | West Middlesex university hospital     |
| L | Kehler     | Wolverhampton NHS Trust                   | P | Amiri               | West Middlesex university hospital     |
| R | Muswell    | Newham University Hospital, London        | S | Shrivastava         | West Middlesex university hospital     |
| M | Bonsano    | Newham University Hospital, London        | F | Raza                | West Middlesex university hospital     |
| J | Evans      | Norfolk and Norwich Hospitals             | S | Wilson              | Wexham Park Hospital                   |
| E | Christmas  | North Hampshire Hospital, Basingstoke     | M | Riyat               | Wexham Park Hospital                   |
| K | Knight     | North Middlesex Hospital, London          | H | Knott               | Wexham Park Hospital                   |
| L | O'Rourke   | North Tees Hospital, Stockton on Tees     | M | Ramazany            | Whiston Hospital, Merseyside           |
| K | Adeboye    | North Tees Hospital, Stockton on Tees     | S | Langston            | Whiston Hospital, Merseyside           |
| K | Ifrikhar   | Northern General Hospital, Sheffield      | N | Abela               | Whiston Hospital, Merseyside           |
| R | Evans      | Northern General Hospital, Sheffield      | L | Robinson            | Whittington Hospital, London           |
| R | Darke      | Northumbria Specialist Emergency Hospital | D | Maasdorp            | Whittington Hospital, London           |
| R | Freeman    | Northumbria Specialist Emergency Hospital | H | Murphy              | Whittington Hospital, London           |
| E | Grocholski | Northwick Park Hospital, London           | H | Edmundson           | Whittington Hospital, London           |
| K | Kaur       | Peterborough City Hospital                | R | Das                 | Whittington Hospital, London           |
| H | Cooper     | Peterborough City Hospital                | C | Orjioko             | Whittington Hospital, London           |
| M | Mohammad   | Princess Royal Hospital, London           | D | Worley              | Whittington Hospital, London           |
| L | Harwood    | Princess Royal Hospital, London           | W | Collier             | Whittington Hospital, London           |
| K | Lines      | Queen Alexandra Hospital, Portsmouth      | J | Everson             | Whittington Hospital, London           |
| C | Thomas     | Queen Alexandra Hospital, Portsmouth      | N | Maleki              | Whittington Hospital, London           |
| D | Ranasinghe | Queen Alexandra Hospital, Portsmouth      | A | Stafford            | Whittington Hospital, London           |
| S | Hall       | Queen Elizabeth Hospital                  | S | Gokani              | Whittington Hospital, London           |
| J | Wright     | Queen Elizabeth Hospital                  | M | Charalambos         | Whittington Hospital, London           |
| S | Hall       | Queen Elizabeth Hospital                  | A | Olajide             | Whittington Hospital, London           |
| N | Ali        | Queen Elizabeth Hospital                  | C | Bi                  | Whittington Hospital, London           |
| J | Hunt       | Queen Elizabeth Hospital, Birmingham      | J | Ng                  | Whittington Hospital, London           |
| H | Ahmad      | Queen Elizabeth Queen's Mother, Margate   | S | Naeem               | William Harvey Hospital, Kent          |
| C | Ward       | Queen Elizabeth Hospital, Glasgow         | J | Anandarajah         | Wrexham Maelor Hospital, Wales         |
| M | Khan       | Queens Medical Centre, Nottingham         | A | Hill                | Wythenshawe Hospital, Manchester       |
| K | Holzman    | Redhill Hospital, Surrey                  | C | Boulind             | Yeovil District Hospital               |



1  
2  
3  
4 J Ritchie Rotherham Hospital  
5 A Hormis Rotherham Hospital  
6

7 **Ireland Trainee Emergency Research Network (I-TERN) Collaborators:**

8 R O'Sullivan Bon Secours Hospital Cork, Ireland  
9 S Gilmartin Children's Health Ireland at Crumlin, Ireland  
10 S Uí Bhroin Children's Health Ireland at Tallaght, Ireland  
11 P Fitzpatrick Children's Health Ireland at Temple Street, Ireland  
12 A Patton Cork University Hospital, Ireland  
13 M Jee Poh Hock Galway Hospital, Ireland  
14 S Graham Mater Misericordiae University Hospital, Ireland  
15 S Kukaswadia Mercy University Hospital, Ireland  
16 C Prendergast Midlands Regional Hospital Tullamore, Ireland  
17 A Ahmed Sligo University Hospital, Ireland  
18 C Dalla Vecchia St Vincent's University Hospital, Ireland  
19 J Lynch Tallaght University Hospital, Ireland  
20 M Grummell Tallaght University Hospital, Ireland  
21 I Grossi University Hospital Limerick, Ireland  
22 B MacManus University Hospital Waterford, Ireland  
23  
24  
25  
26

27 **Research and Audit Federation of Trainees (RAFT), Trainee Research in Intensive Care (TRIC) and  
28 Specialist Anaesthesia Trainee led Audit and Research Network (SATURN) Collaborators:**

29  
30 K Samuel North Bristol NHS Trust  
31 A Boyle Royal Victoria Hospital, Belfast  
32 A Waite Royal Liverpool University Hospital  
33 B Johnson University of Liverpool  
34 J Vinagre Children's Health Ireland at Temple Street  
35  
36  
37  
38  
39  
40  
41  
42  
43  
44  
45  
46  
47  
48  
49  
50  
51  
52  
53  
54  
55  
56  
57  
58  
59  
60

1  
2  
3  
4  
5  
6  
7  
8  
9  
10  
11  
12  
13  
14  
15  
16  
17  
18  
19  
20  
21  
22  
23  
24  
25  
26  
27  
28  
29  
30  
31  
32  
33  
34  
35  
36  
37  
38  
39  
40  
41  
42  
43  
44  
45  
46  
47  
48  
49  
50  
51  
52  
53  
54  
55  
56  
57  
58  
59  
60

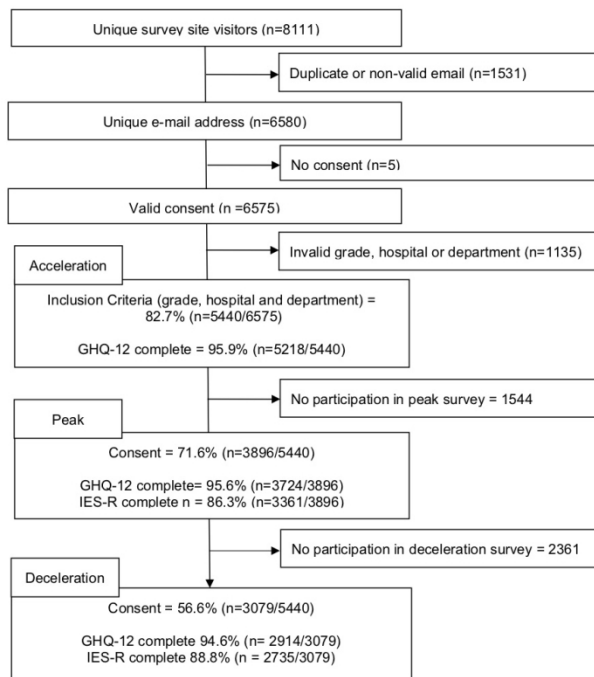

Figure 1. Participant flowchart

209x297mm (150 x 150 DPI)

1  
2  
3  
4  
5  
6  
7  
8  
9  
10  
11  
12  
13  
14  
15  
16  
17  
18  
19  
20  
21  
22  
23  
24  
25  
26  
27  
28  
29  
30  
31  
32  
33  
34  
35  
36  
37  
38  
39  
40  
41  
42  
43  
44  
45  
46  
47  
48  
49  
50  
51  
52  
53  
54  
55  
56  
57  
58  
59  
60

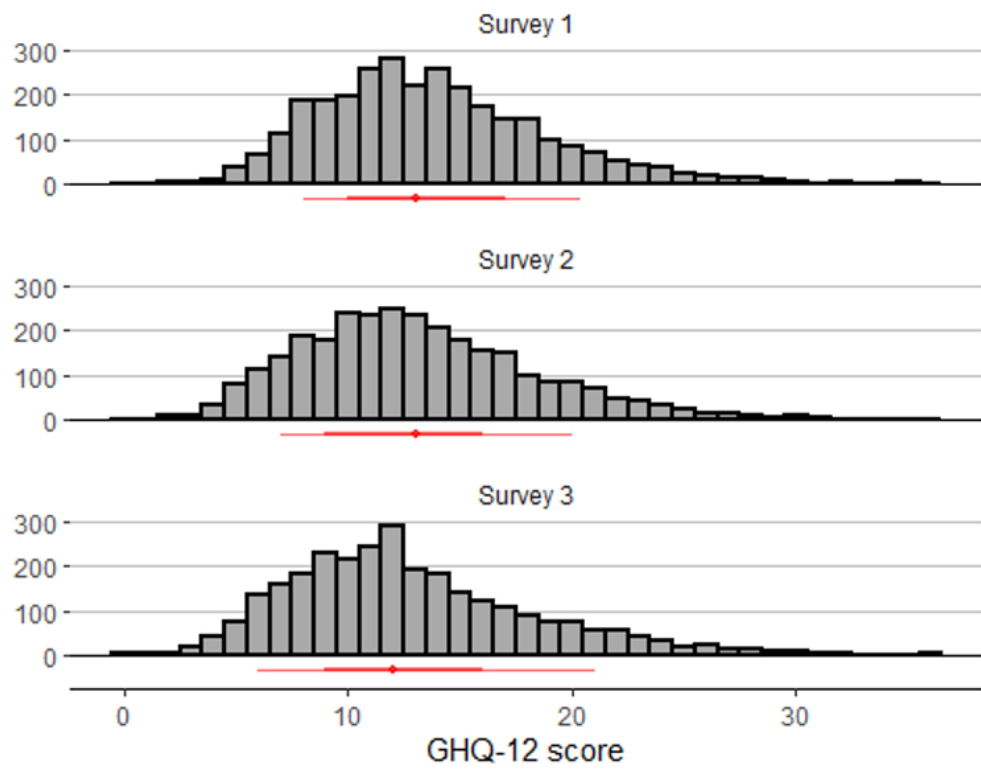

Figure 2. GHQ-12 Scores

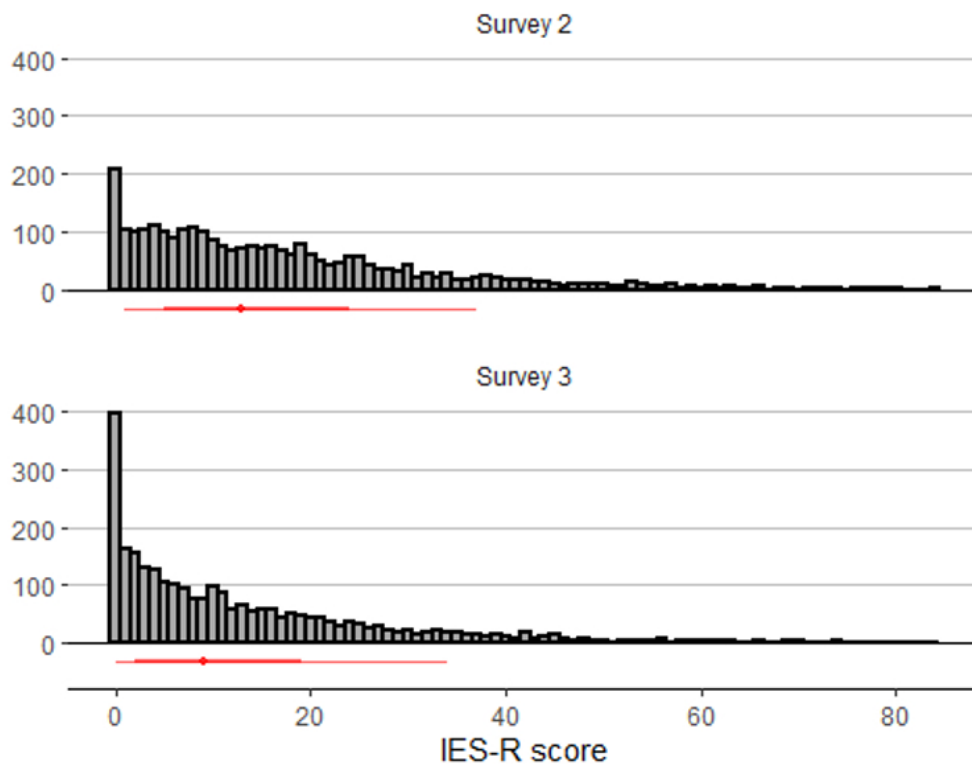

Figure 3. IES-R Scores

## Variation in GHQ-12 explained by each model

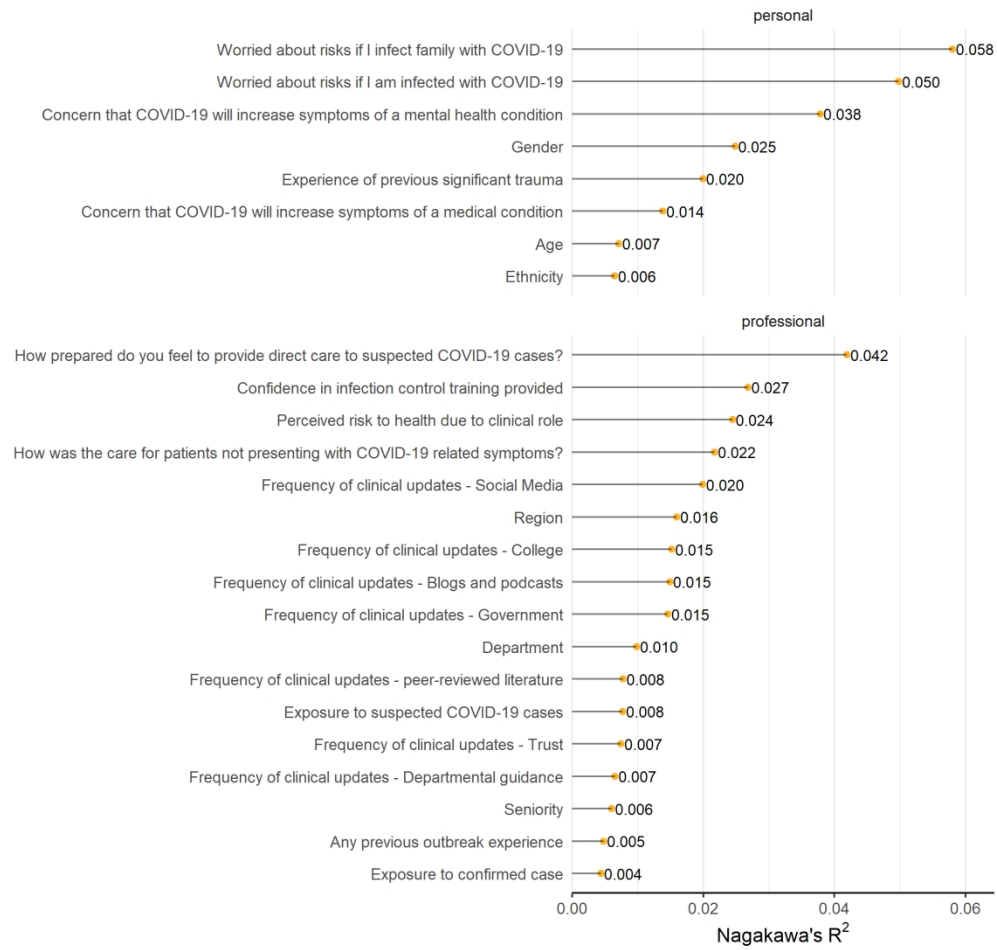

Figure 4. GHQ-12 variance explained model

Variation in IES-R explained by each model

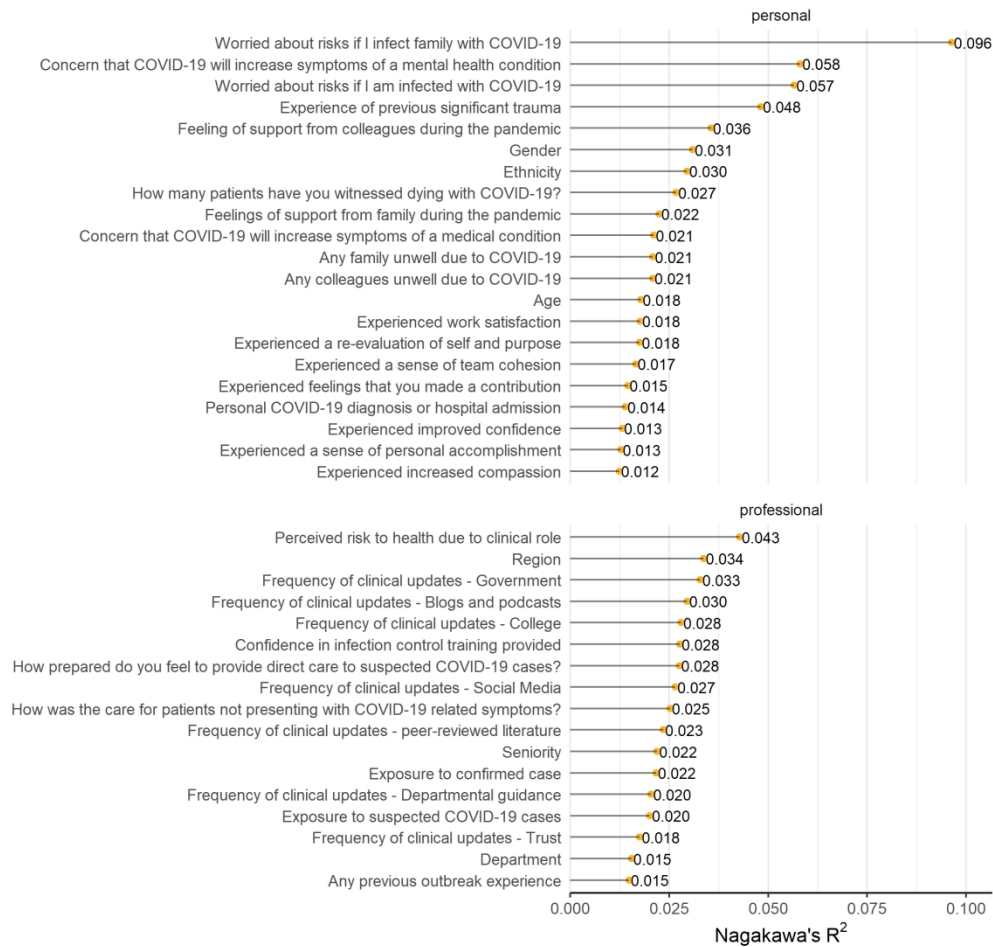

Figure 5. IES-R variance explained model

1  
2  
3  
4  
5

6  
7 Figure 6a. GHQ-12 outcome - worried about risks if I infect family

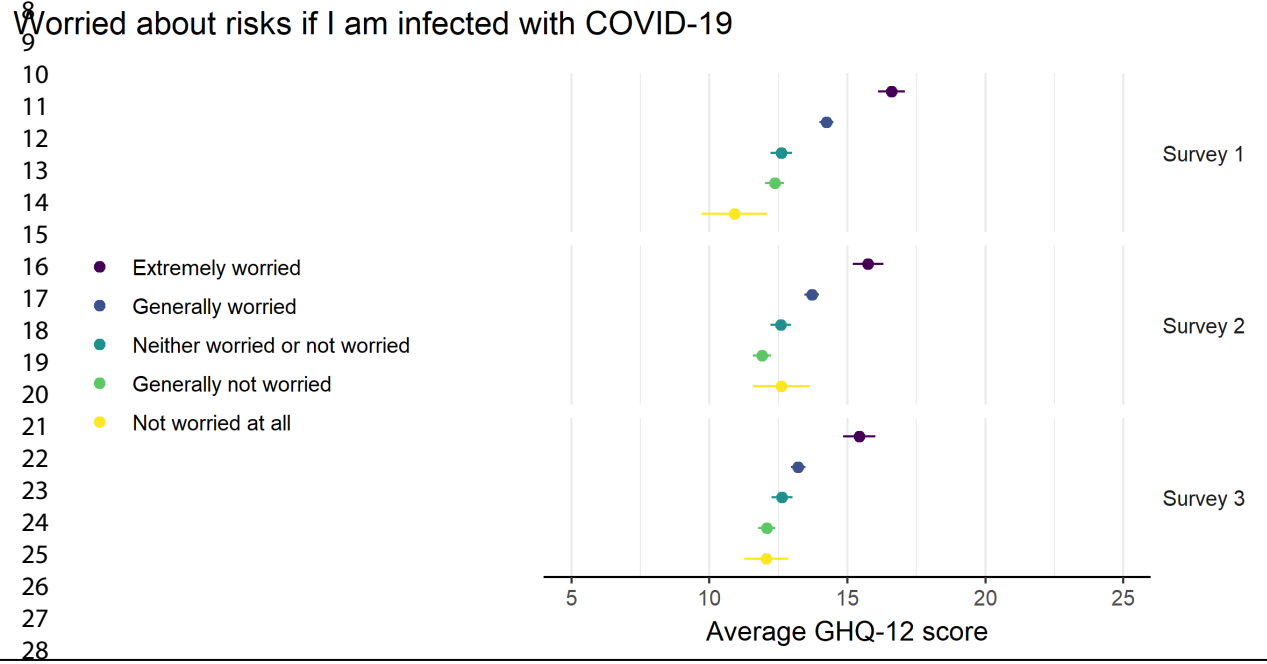

6  
7 Figure 6b. GHQ-12 outcome - worried about risks if am infected

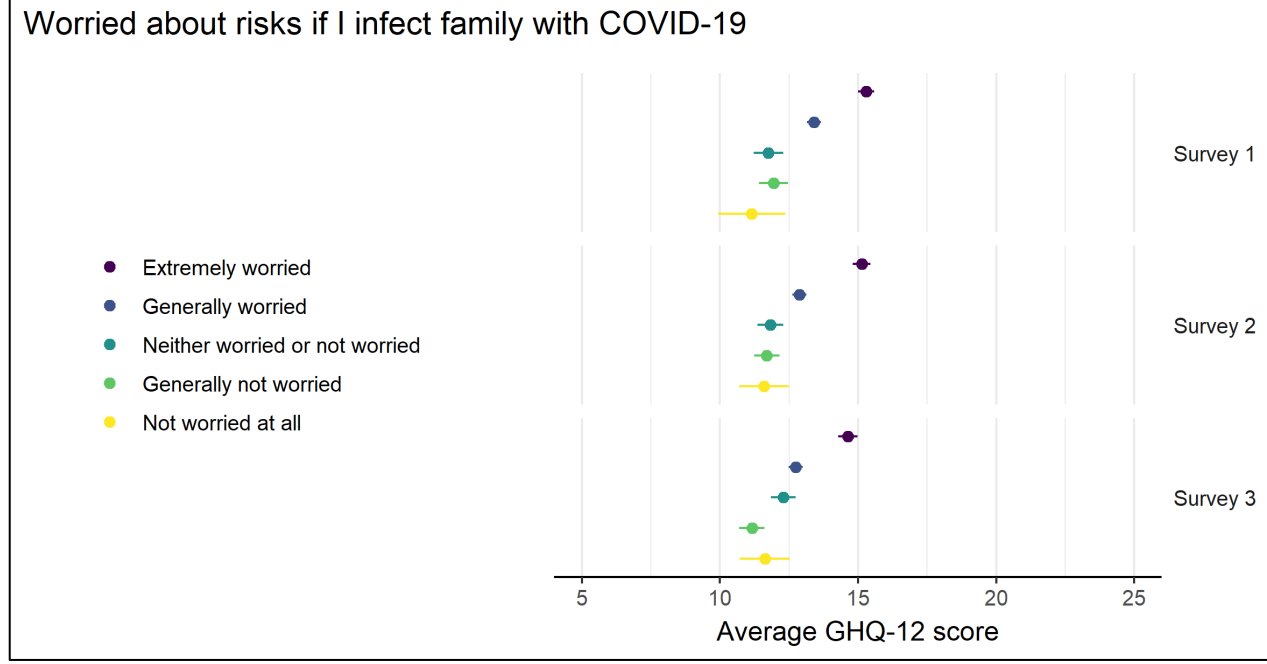

29  
30  
31  
32  
33  
34  
35  
36  
37  
38  
39  
40  
41

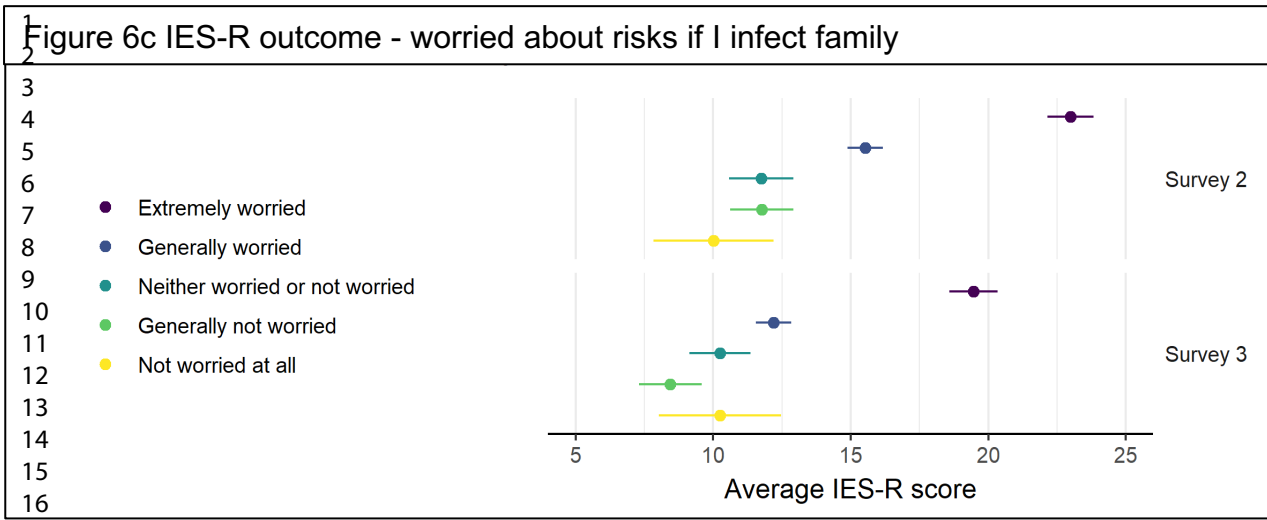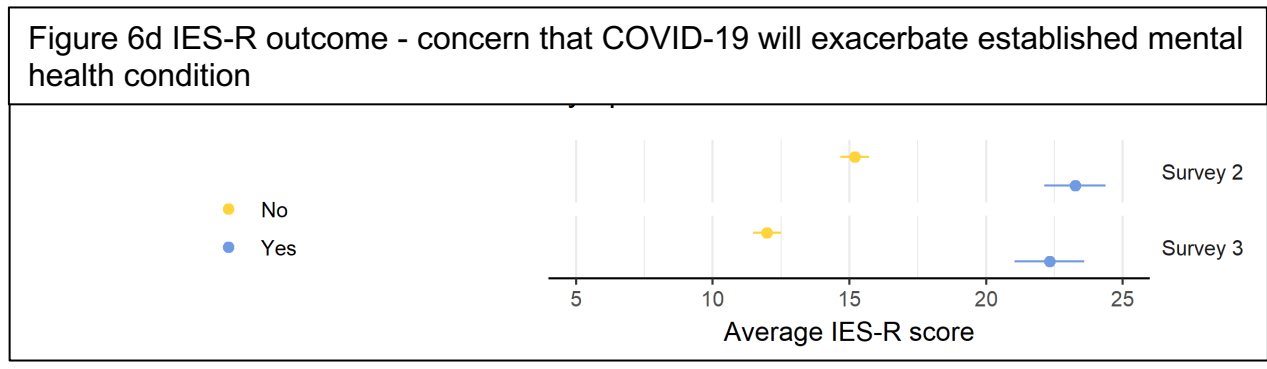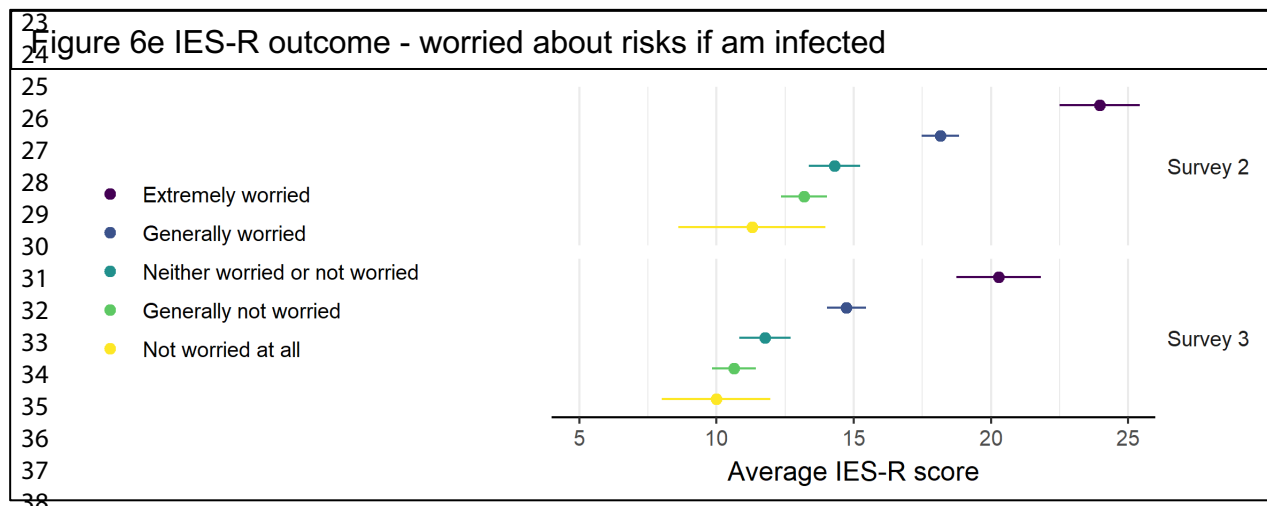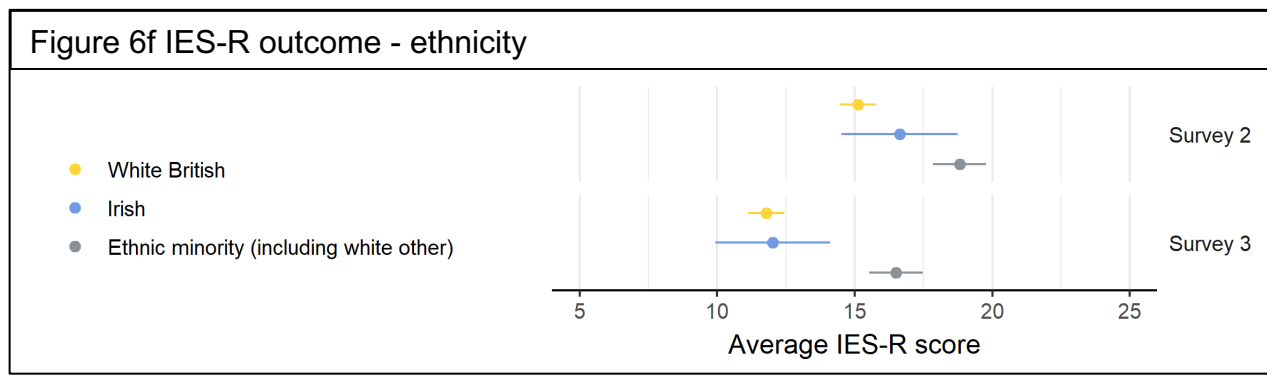



1  
2  
3  
4  
5  
6  
7  
8  
9  
10  
11  
12  
13  
14  
15  
16  
17  
18  
19  
20  
21  
22  
23  
24  
25  
26  
27  
28  
29  
30  
31  
32  
33  
34  
35  
36  
37  
38  
39  
40  
41  
42  
43  
44  
45  
46  
47  
48  
49  
50  
51  
52  
53  
54  
55  
56  
57  
58  
59  
60

Region

- East Midlands
- East of England
- London
- North East
- North West
- South East
- South West
- West Midlands
- Yorkshire and the Humber
- Northern Ireland
- Scotland
- Wales
- Dublin
- Rest of Ireland

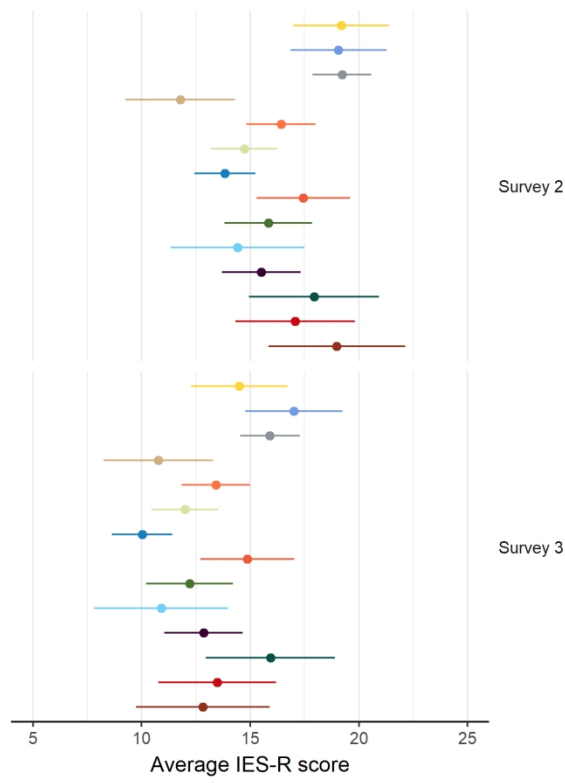

Figure 7. IES-R Outcome - Region

1  
2  
3  
4  
5  
6  
7  
8  
9  
10  
11  
12  
13  
14  
15  
16  
17  
18 ***CERA Online Supplement - Content***  
19

20 ***Page 2 - 3: Drop out GHQ-12 and IES-R for those***  
21 ***participants who did not complete all surveys***  
22 ***compared to those who did***  
23  
24

25  
26 ***Page 4 till end: CERA survey 1,2 and 3***  
27  
28  
29  
30  
31  
32  
33  
34  
35  
36  
37  
38  
39  
40  
41  
42  
43  
44  
45  
46  
47  
48  
49  
50  
51  
52  
53  
54  
55  
56  
57  
58  
59  
60

Drop out rate for surveys 2 and 3 by survey 1 GHQ-12 score

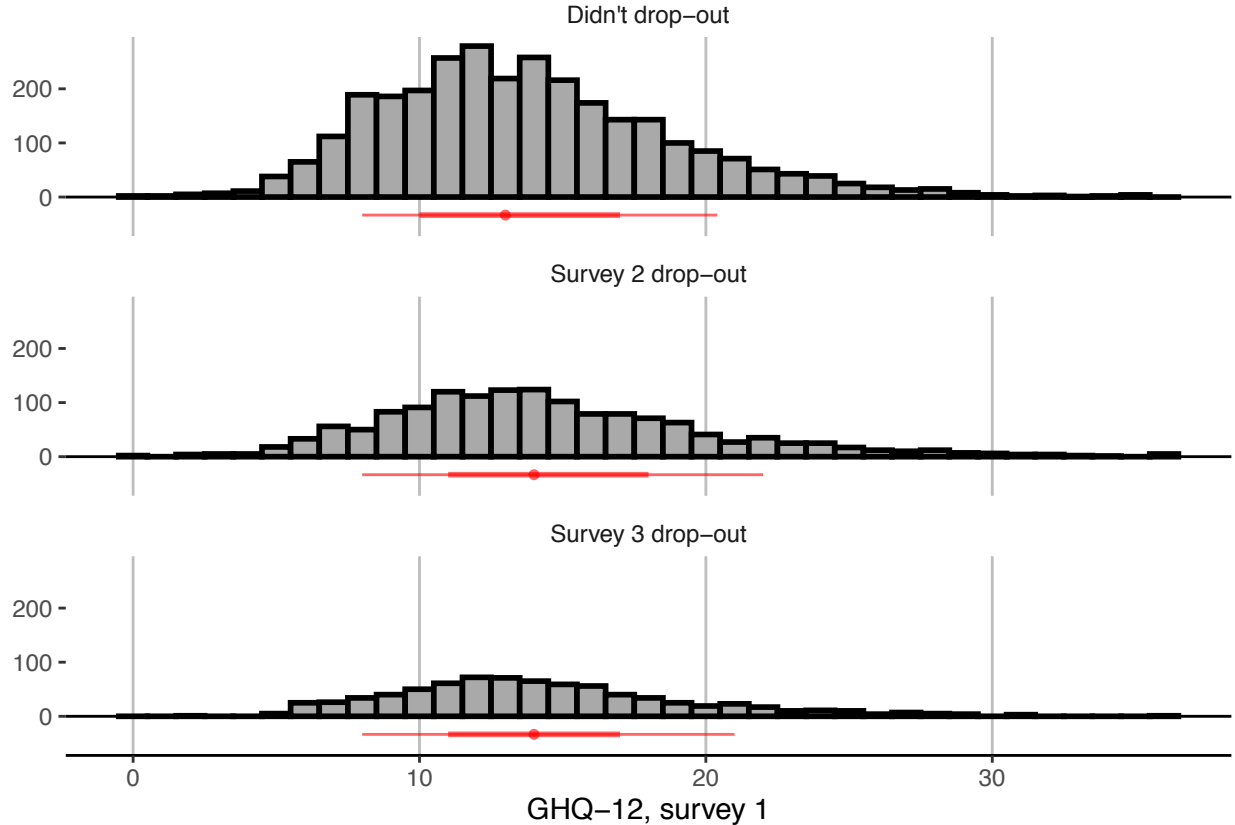

ew only

Drop out rate for survey 3 by survey 2 IES-R score

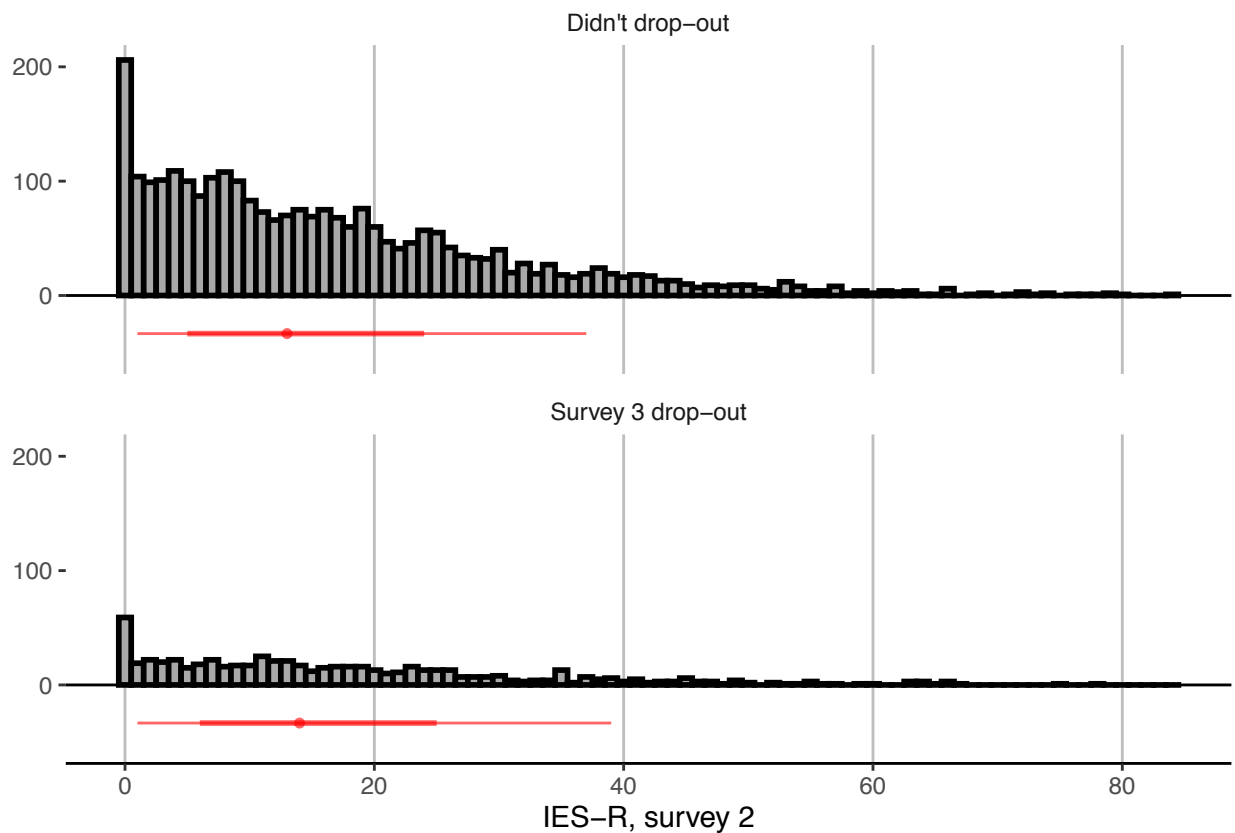

# CERA Survey

Thank you for taking the time to answer these questions. This survey will take less than 4 minutes.

Thank you for taking the time to consider taking part in the COVID-19 Emergency Response Assessment (CERA Study).

It is important that you read this information, so that you understand the purpose of the study and how we will treat your data.

What is the CERA study?

The CERA study consists of three questionnaires that will be conducted during the current COVID-19 outbreak. The CERA study will assess how you are feeling about your general health, anxiety levels, and mood at three points in time. Separate questionnaires will be issued before, during, and after the peak of the current COVID-19 outbreak.

What is the purpose of the CERA study?

This study will provide information regarding how staff working in Emergency care settings are feeling whilst working during the current COVID-19 outbreak. Full analysis of data will help identify how emergency staff can be better supported during future disease outbreaks.

Who has organised the CERA study?

The CERA study is led by the Trainee Emergency Research Network (TERN), in association with the Paediatric Emergency Research in the UK and Ireland (PERUKI) and Research and Audit Federation of Trainees (RAFT). The CERA study is supported by the UK Royal College of Emergency Medicine (RCEM).

Has the CERA study received external approval?

Yes, the CERA study has received University Ethics Approval from the University of Bath (Ref: 4421). The CERA study has been approved by the Health Research Authority (HRA).

What will happen if I take part?

There will be three separate e-surveys to complete, including this one. Each survey is completed online, and will take between about 3 and 5 minutes. Surveys will be issued at different times.

You be required to submit your email address as part of this survey, which will allow us to invite you to participate in the other two surveys. You are not required to submit any additional personal identifiable information. We will remove your email address from data, prior to analysis.

Are there any potential risks?

Some of the issues explored will be sensitive, and we understand that this may be a challenging time for you. We have included some information about sources that you might wish to contact within this survey.

How will you protect my data and ensure confidentiality?

North Bristol NHS Trust is supporting this study and will be responsible for looking after your information and using it properly. The data collected will be stored for 5 years after the study has finished.

Your rights to access, change or move your information are limited, as we need to manage your information in specific ways in order for the research to be reliable and accurate. If you withdraw from the study, we will keep the information about you that we have already obtained. We will collect only personal identifiable information possible.

This study is also compliant with the General Data Protection Regulations (GDPR).

Do I have to take part?

You are under no obligation to take part, and you may withdraw at any point without giving a reason.

What will happen to my data if I withdraw my involvement?

If you choose to withdraw your involvement in the study, any results that you have submitted will be kept for analysis. However, you will not be required to input further into the study. We will need to use information from you for this research project. This information will include your email address. People will use this information to do the research or to check your records to make sure that the research is being done properly. Once we have finished the study, we will keep some of the data so we can check the results. We will write our reports in a way that no-one can work out that you took part in the study.

What are your choices about how your information is used?

You can stop being part of the study at any time, without giving a reason, but we will keep information about you that we already have.

Where can you find out more about how your information is used?

You can find out more about how we use your information

at [www.nhs.uk/information-about-patients/](http://www.nhs.uk/information-about-patients/)

For peer review only: <http://bmjopen.bmj.com/site/about/guidelines.xhtml>

- our leaflet available from [www.nbt.nhs.uk/PatientResearchdata](http://www.nbt.nhs.uk/PatientResearchdata)
- by asking one of the research team
- by contacting Helen Williamson (Head of Information Governance) at [helen.e.williamson@nbt.nhs.uk](mailto:helen.e.williamson@nbt.nhs.uk), or by ringing 0117 41 44767.

Who can I contact if I have any questions?

Please contact Dr Tom Roberts (Chief Investigator) at [tern@rcem.ac.uk](mailto:tern@rcem.ac.uk) if you have any questions.

What to do if you need support about wellbeing

The following organisations can help provide advice and support with regards to your wellbeing.

- Your occupational health department (contact details available via your employer)
- Your general practitioner
- <https://anaesthetists.org/Home/Wellbeing-support>
- BMA Counselling Service (24 Hours). Telephone 0330 123 1245. (Note that you do not have to be a member of the BMA to access this service)
- The Samaritans (24 Hours). Telephone 116 123.

For the attention of Irish Clinicians:

The following organisations can help provide advice and support with regards to your wellbeing in the Republic of Ireland.

- HSE Workplace Health and Wellbeing Unit - Contact Dr Lynda Sisson [HR.wellbeing@hse.ie](mailto:HR.wellbeing@hse.ie)
- The Employee Assistance and Counselling Service (EAC)
- Pieta House [www.pieta.ie](http://www.pieta.ie) or call 188 247 247
- Your Mental Health [www.yourmentalhealth.ie](http://www.yourmentalhealth.ie)
- Practitioner Health (Ireland). Telephone 01 297 0356

Specific Consent statement for the Republic of Ireland

I consent to the processing of my personal data as set out in the information leaflet for the research purposes that are part of the CERA study - Consent using the button in the next question.

---

Do you want to read the participant information sheet now?  Yes  No

---

If you would like to download the patient information sheet to read later, please download the link below.

[Attachment: "CERA PIS V 1.1.docx"]

1 **Consent and Identifiers**

2  
3 By checking this box, I certify that I am at least 18  I consent  
4 years old and that I give my consent freely to  
5 participate in this study.

6  
7 What is your e-mail address?

8 \_\_\_\_\_  
9 (This will only be used for the delivery of survey 2  
10 + 3, which you will receive over the coming months)

11  
12  
13  
14  
15  
16  
17  
18  
19  
20  
21  
22  
23  
24  
25  
26  
27  
28  
29  
30  
31  
32  
33  
34  
35  
36  
37  
38  
39  
40  
41  
42  
43  
44  
45  
46  
47  
48  
49  
50  
51  
52  
53  
54  
55  
56  
57  
58  
59  
60

For peer review only

1 **About you**

2  
3  
4  
5  
6  
7  
8  
9  
10  
11  
12  
13  
14  
15  
16  
17  
18  
19  
20  
21  
22  
23  
24  
25  
26  
27  
28  
29  
30  
31  
32  
33  
34  
35  
36  
37  
38  
39  
40  
41  
42  
43  
44  
45  
46  
47  
48  
49  
50  
51  
52  
53  
54  
55  
56  
57  
58  
59  
60

For peer review only



1 What is the name of the hospital where you currently  
2 work?  
3 Please type and your hospital should appear, if not  
4 present select "other"

- Aberdeen Royal Infirmary
- Addenbrooke's Cambridge University Hospital
- Aintree University Hospital
- Airedale NHS Foundation Trust
- Alder Hey Children's Hospital NHS Foundation Trust
- Altnagelvin Area Hospital
- Aneurin Bevan Health Board
- Ayr University Hospital Ayr. NHS A&A
- Havering & Redbridge University Hospitals NHS Trust
- Barnsley hospital NHS foundation trust
- Basingstoke (Hampshire Hospitals NHS Foundation Trust)
- Bedford hospital NHS trust
- Betsi Cadwaladr University Health Board
- Birmingham Children's Hospital
- Bon secours Hospital
- Bradford Teaching Hospitals Foundation Trust
- Brighton and Sussex University Hospitals NHS Trust
- Bristol Royal Hospital for Children
- Bristol Royal Infirmary
- Calderdale Hospital
- Central Manchester NHS trust
- Chelsea & Westminster Hospital
- Children's Health Ireland at Crumlin
- Children's Health Ireland at Tallaght
- Children's Health Ireland at Temple Street
- City Hospitals Sunderland NHS Foundation Trust
- Connolly Blanchardstown Hospital
- Conquest and Easborne Hospitals
- Cork University Hospital
- Countess of Chester NHS Foundation Trust
- County Durham & Darlington NHS Foundation Trust
- Craigavon Hospital
- Croydon
- Cumberland Infirmary
- Daisy Hill Hospital
- Derriford Hospital
- East and North Hertfordshire NHS Trust
- East Lancashire NHS Hospital Trust
- East Sussex Healthcare NHS Trust
- Epsom and St Helier Hospitals
- Evelina London Children's Hospital
- Fairfield
- Forth Valley Hospital
- Frimley Park Hospital
- Galway
- Gateshead Health NHS Foundation Trust
- Gloucestershire Hospitals NHS Foundation Trust
- Good Hope
- Great North Children's Hospital, Newcastle Upon Tyne
- Great Western Hospital, Swindon
- Guy's & St Thomas NHS Foundation Trust
- Harrogate & District NHS Foundation Trust
- Heartlands's Hospital
- Hillingdon Hospital
- Homerton University Hospital
- HSE Ireland - Cork University Hospital
- Huddersfield Royal Infirmary and Calderdale Royal Hospital
- Hull University Hospital
- Inverclyde Royal Hospital
- Ipswich Hospital
- James Cook University Hospital
- James Paget Hospital and NHS Trust Gorleston
- John Radcliffe Hospital
- King's College Hospital
- Kingston University Hospital and NHS Foundation Trust

For peer review only

1  
2  
3  
4  
5  
6  
7  
8  
9  
10  
11  
12  
13  
14  
15  
16  
17  
18  
19  
20  
21  
22  
23  
24  
25  
26  
27  
28  
29  
30  
31  
32  
33  
34  
35  
36  
37  
38  
39  
40  
41  
42  
43  
44  
45  
46  
47  
48  
49  
50  
51  
52  
53  
54  
55  
56  
57  
58  
59  
60

For peer review only

- Lancashire Teaching Hospitals (Royal Preston Hospital)
- Leeds teaching hospitals NHS Trust
- Leicester Royal Infirmary
- Leighton (mid cheshire)
- Lister Hospital
- Liverpool University Hospitals NHS Trust
- Luton and Dunstable University Hospital
- Macclesfield Hospital
- Maidstone and Tunbridge Wells NHS Trust
- Manchester Univeristy NHS Foundation Trust
- Mater Misericordiae University Hospital
- Medway NHS Foundation Trust
- Mid Cheshire Hospitals NHS Foundation Trust
- Milton Keynes University Hospital
- Morriston Hospital
- Musgrove Park Hospital, Taunton
- Newcastle upon Tyne Hospitals NHS Foundation Trust
- Newham University Hospital
- Norfolk & Norwich University Hospital
- Southmead Hospital, North Bristol NHS Trust
- North Hampshire Hospital, Basingstoke
- North Manchester General Hospital
- North Middlesex Hospital
- North Tees and Hartlepool Hospitals NHS Foundation Trust
- Northern Devon Healthcare NHS Trust
- Northern general, Sheffield
- Northumbria Healthcare NHS Trust
- Northwick Park Hospital
- Nottingham University Hospitals NHS Trust
- Oldham
- Ormskirk & District General Hospital
- Peterborough City Hospital
- Portsmouth Hospitals Trust
- Princess Royal Univeristy Hospital
- Queen Alexandra Hospital
- Queen Elizabeth Hospital, Birmingham
- Queen Elizabeth Hospital, Woolwich
- Queen Elizabeth Queen's mother hospital Margate
- Queen Elizabeth University Hospital Glasgow
- Queens Medical Centre (Nottingham)
- Rotherham
- Royal Aberdeen Children's Hospital
- Royal Alexandra Children's Hospital, Brighton
- Royal Alexandra Hospital, Paisley
- Royal Belfast Hospital for Sick Children
- Royal Berkshire Hospital NHS Foundation Trust
- Royal Bolton Foundation Trust
- Royal Cornwall NHS Trust
- Royal Devon & Exeter Hospital
- Royal Free Hospital
- Royal Gwent hospital
- Royal Hampshire County Hospital
- Royal Hospital for Children, Glasgow
- Royal Hospital for Sick Children, Edinburgh
- Royal Infirmary of Edinburgh
- Royal Liverpool
- Royal London Hospital
- Royal Manchester Children's Hospital
- Royal Preston Hospital
- Royal Stoke University Hospital
- Royal Surrey County Hospital
- Royal Surrey NHS Foundation Trust
- Royal Sussex county hospital
- Royal United Hospital, Bath
- Royal Victoria Hospital, Belfast
- Royal Victoria Infirmary, Newcastle
- Royal Wolverhampton NHS Trust
- Salford Royal NHS Foundation Trust
- Salisbury NHS Foundation Trust

1  
2  
3  
4  
5  
6  
7  
8  
9  
10  
11  
12  
13  
14  
15  
16  
17  
18  
19  
20  
21  
22  
23  
24  
25  
26  
27  
28  
29  
30  
31  
32  
33  
34  
35  
36  
37  
38  
39  
40  
41  
42  
43  
44  
45  
46  
47  
48  
49  
50  
51  
52  
53  
54  
55  
56  
57  
58  
59  
60

- Sandwell and West Birmingham NHS Foundation Trust
- Scarborough Hospital
- Sheffield Children's Hospital
- Sheffield Teaching Hospitals Foundation NHS Trust
- South Eastern Health and Social Care Trust
- Southampton Children's Hospital
- Southport
- Southport & Ormskirk Hospital
- St George's Hospital London
- St Helen's and Knowsley NHS trust
- St John's Hospital, Livingston
- St Mary's Hospital
- Stockport NHS Trust
- Stoke Mandeville Hospital
- Sunderland and South Tyneside NHS Foundation Trust
- Surrey and Sussex Healthcare NHS Trust
- Torbay and South Devon NHS Trust
- Tunbridge Wells NHS Trust
- Ulster Hospital Dundonald
- University College London Hospitals NHS Trust
- University Hospital Ayr
- University Hospital Coventry
- University Hospital Crosshouse
- University Hospital Lewisham
- University Hospital Monklands
- University Hospital of Wales, Cardiff
- University hospital Southampton
- University Hospital Waterford
- University Hospital Wishaw
- University Hospitals Birmingham
- University Hospitals Coventry & Warwickshire NHS
- University Hospitals Derby and Burton NHS Foundation
- University Hospitals of Leicester NHS Trust
- University Hospitals of North Midlands
- University Hospitals Plymouth
- Warwick Hospital
- Watford General Hospital (West Herts NHS Trust)
- West Middlesex
- Western Sussex Hospitals NHS Trust
- Wexham Park Hospital
- Whipp's Cross Hospital
- Whiston Hospital
- Whittington Health NHS Trust
- William Harvey Hospital
- Wrexham Maelor Hospital
- Yeovil District Hospital NHS Foundation Trust
- York Teaching Hospital NHSFT
- Other
- Wythenshawe Hospital
- Antrim Area Hospital
- Arroe park hospital
- St Peter's Hospital
- Balfour Hospital, Orkney
- Barking havering and redbridge university hospitals NHS foundation trust
- Barnet Hospital
- Basildon
- Belfast City Hospital
- Blackpool Victoria Hospital
- BMI Sarum Rd Winchester
- Broomfield Hospital
- Causeway hospital
- Charing Cross Hospital, London
- Chesterfield Royal Hospital
- Colchester General Hospital
- Darent Valley Hospital
- Dartford and Gravesham NHS Trust
- Diana Princess of Wales, Grimsby
- Doncaster Royal Infirmary
- Dorset County Hospital

1  
2  
3  
4  
5  
6  
7  
8  
9  
10  
11  
12  
13  
14  
15  
16  
17  
18  
19  
20  
21  
22  
23  
24  
25  
26  
27  
28  
29  
30  
31  
32  
33  
34  
35  
36  
37  
38  
39  
40  
41  
42  
43  
44  
45  
46  
47  
48  
49  
50  
51  
52  
53  
54  
55  
56  
57  
58  
59  
60

For peer review only - <http://bmjopen.bmj.com/site/about/guidelines.xhtml>

- Dudley Group NHS Foundation Trust
- Dumfries and Galloway Royal Infirmary
- Ealing
- East Surrey Hospital
- Freeman Hospital, Newcastle
- Galngwili General Hospital
- George Eliot Hospital Nuneaton
- Glan Clwyd hospital
- Glangwili General Hospital Carmarthen Wales
- Glasgow Royal Infirmary
- Glen field Leicester
- GP Woodlands primary care sidcup
- Great Ormond Street Hospital
- Grimsby hospital.
- Hammersmith Hospital London
- Harefield
- Hereford County Hospital
- HMS Raleigh
- Horton General Hospital Banbury
- Hull University Teaching hospitals NHS Trust
- Kent and Canterbury Hospital
- Kettering General Hospital
- Kings Mill Hospital
- Lincoln county hospital
- Liverpool Heart and Chest Hospital
- Liverpool Women's Hospital
- Mid Essex NHS Trust
- Mid yorkshire hospital
- Moorfields Eye Hospital
- National Hospital for Neurology and Neurosurgery
- Nevill Hall Hospital
- New Cross Hospital
- Ninewells Hospital, Dundee
- Northampton General Hsopital
- Northern Lincolnshire and Goole NHS Foundation Trust
- Oxford University Hospital
- Perth Royal Infirmary
- Pilgrim Hospital Boston Lincolnshire
- Pinderfields general Hospital, Wakefield
- Poole
- Prince Charles Hospital
- Princess of Wales Hospital, Bridgend
- Princess Royal Hospital, Shrewsbury and Telford Hospitals NHS Trust
- Queen Charlotte's and Chelsea Hospital
- Queen Elizabeth Hospital Gateshead
- Queen Elizabeth Hospital King's Lynn
- Queen Victoria Hospital, East Grinstead
- Queens Hospital - Romford
- Raigmore Hospital
- Raigmore Hospital, Inverness
- Robert Jones & Agnes Hunt Orthopaedic Hospital
- Royal Blackburn
- Royal Bournemouth NHS Trust
- Royal Brompton
- Royal Glamorgan Hospital
- Royal Lancaster Infimary
- Royal Marsden hospital
- Royal National Orthopaedic Hospital
- Royal Orthopaedic Hospital Birmingham
- Royal Papworth Hospital
- Royal Shrewsbury Hospital
- Russells Hall Hospital, Dudley
- Scunthorpe General Hospital
- Sherwood Forest nhs trust
- Southend University Hospital
- St Bartholomew's Hospital London
- St Peter's, Chertsey (Ashford and St Peter's Trust)
- St. Bartholomew's Hospital
- St. Mary's Hospital, Imperial College Healthcare

## NHS Trust

- 1  Tameside and Glossop
- 2  The Balfour , Orkney
- 3  The Horton General Hospital
- 4  The Porch Surgery
- 5  The Queen Elizabeth Hospital, King's Lynn
- 6  The Royal Oldham Hospital
- 7  University Hospitals of Morecambe Bay Foundation
- 8  trust
- 9  Walton centre
- 10  Warrington and Halton Teaching Hospitals NHS
- 11  Foundation Trust
- 12  Wasall Manor Hospital
- 13  West cumberland hospital
- 14  West Middlesex University Hospital
- 15  West Suffolk hospital
- 16  Western General Hospital Edinburgh
- 17  Wirral University Teaching Hospital
- 18  Worcestershire Royal Hospital
- 19  Worthing Hospital
- 20  Wrightington Wigan and Leigh NHS Foundation Trust
- 21  Wycombe Hospital Buckinghamshire NHS Trust
- 22  Ysbyty Gwynedd
- 23  University Hospital Hairmyres

24 You have selected other, please specify.

25 \_\_\_\_\_

26

27 What is your professional grade?

- 28  GP Trainee
- 29  ST1
- 30  ST2
- 31  ST3
- 32  ST4
- 33  ST5
- 34  ST6
- 35  ST7
- 36  ST8
- 37  F1
- 38  F2
- 39  Clinical Fellow (F2-ST3 Level)
- 40  Clinical Fellow (>=ST4 Level)
- 41  Consultant
- 42  Associate Specialist
- 43  Staff Grade
- 44  CESR Doctor
- 45  GP
- 46  Other

47 You have selected other, please specify.

48 \_\_\_\_\_

49 What is your gender?

- 50  Male
- 51  Female
- 52  Other
- 53  Prefer not to say
- 54
- 55
- 56
- 57
- 58
- 59
- 60

1 How old are you?  20-25  
 2  26-30  
 3  31-35  
 4  36-40  
 5  41-45  
 6  46-50  
 7  51-55  
 8  56-60  
 9  61-65  
 10  66-70  
 11  >70

13 What is your 'parent speciality'?  Emergency Medicine  
 14  Anaesthetics  
 15  Intensive Care Medicine  
 16  Paediatrics  
 17  General Practice  
 18  Surgery  
 19  Foundation Programme  
 20  Acute Internal Medicine  
 21  Other

23 What is your 'parent speciality'?  Emergency Medicine  
 24  Anaesthetics  
 25  Intensive Care Medicine  
 26  Paediatrics  
 27  General Practice  
 28  Surgery  
 29  Foundation Programme  
 30  Acute Internal Medicine  
 31  Other

33 You have selected other, please specify.  
 34 \_\_\_\_\_  
 35

36 In what Department were you working as of March 1st  
 37 2020?  Emergency Department (adult or paediatric)  
 38  Anaesthetic Department (adult or paediatric)  
 39  Intensive Care Department (adult or paediatric)  
 40  Acute Medical Unit  
 41  Hospital ward (adult or paediatric)  
 42  Other

43 In what Department were you working as of March 1st  
 44 2020?  Emergency Department (adult or paediatric)  
 45  Anaesthetic Department (adult or paediatric)  
 46 Select all that apply  Intensive Care Department (adult or paediatric)  
 47  Acute Medical Unit  
 48  Hospital ward (adult or paediatric)  
 49  Other

50 You selected other, in which Department where you  
 51 working as of March 1st 2020?  
 52 \_\_\_\_\_  
 53  
 54

55 Have you been deployed to a different clinical area  
 56 as a result of the COVID-19 outbreak?  Yes  
 57  No  
 58  
 59  
 60

1 Where have you been redeployed to?  
2  
3  
4  
5  
6  
7

- Emergency Department (adult or paediatric)
- Anaesthetic Department (adult or paediatric)
- Intensive Care Department (adult or paediatric)
- Acute Medical Unit
- Hospital ward (adult or paediatric)
- Other

8 You have selected other, please specify.  
9 \_\_\_\_\_  
10

11  
12 How satisfied are you with this redeployment?  
13  
14  
15  
16  
17

- Very dissatisfied
- Somewhat dissatisfied
- Neither satisfied nor dissatisfied
- Somewhat satisfied
- Very satisfied

18 Have you previously provided direct clinical care to  
19 any patients affected by these infectious disease  
20 outbreaks? (please select all that apply)  
21  
22  
23  
24  
25  
26  
27

- None of the below
- Ebola virus
- MERS-CoV
- SARS
- Chikungunya
- Cholera
- Influenza (swine, avian, zoonotic)
- Zika virus
- Other

28 You have selected other, please specify.  
29 \_\_\_\_\_  
30  
31  
32  
33  
34  
35  
36  
37  
38  
39  
40  
41  
42  
43  
44  
45  
46  
47  
48  
49  
50  
51  
52  
53  
54  
55  
56  
57  
58  
59  
60

**Personal Protective Equipment (PPE) and General Training****What training have you received in regards to personal protective equipment (PPE) since the COVID-19 outbreak was declared? (select all that apply)**

|                                                                             | No training              | Formal instructional video | Written instruction      | Simulation training      | Departmental guidance    | Other                    |
|-----------------------------------------------------------------------------|--------------------------|----------------------------|--------------------------|--------------------------|--------------------------|--------------------------|
| Donning and doffing (gloves, gown, facemask, eye protection)                | <input type="checkbox"/> | <input type="checkbox"/>   | <input type="checkbox"/> | <input type="checkbox"/> | <input type="checkbox"/> | <input type="checkbox"/> |
| Formal fit testing for mask                                                 | <input type="checkbox"/> | <input type="checkbox"/>   | <input type="checkbox"/> | <input type="checkbox"/> | <input type="checkbox"/> | <input type="checkbox"/> |
| PPE training for exposure to aerosol generating procedure (e.g. intubation) | <input type="checkbox"/> | <input type="checkbox"/>   | <input type="checkbox"/> | <input type="checkbox"/> | <input type="checkbox"/> | <input type="checkbox"/> |

Other. Please specify.

\_\_\_\_\_

If you have had any further PPE training please specify

\_\_\_\_\_

What practical education have you received in regards to the clinical care of patients presenting with suspected/diagnosed COVID-19?

- None  
 Simulation training of a possible case  
 Simulation training of a case requiring aerosol procedure  
 Other

You selected other. Please specify.

\_\_\_\_\_



**How frequently do you access the following sources of information regarding policy and clinical aspects of COVID-19?**

|                           | Hourly                | Up to twice a day     | Daily                 | Several times a week  | Weekly                | Less than weekly      | Never                 |
|---------------------------|-----------------------|-----------------------|-----------------------|-----------------------|-----------------------|-----------------------|-----------------------|
| Government Guidance       | <input type="radio"/> |
| College Guidance          | <input type="radio"/> |
| Trust Guidance            | <input type="radio"/> |
| Departmental guidance     | <input type="radio"/> |
| Social Media              | <input type="radio"/> |
| Online blogs and podcasts | <input type="radio"/> |
| Peer review literature    | <input type="radio"/> |

How confident do you feel in the infection control training that has been provided to you?

Not confident at all  
 Somewhat not confident  
 Neither not confident or confident  
 Somewhat confident  
 Very confident

How prepared do you feel to provide direct care to suspected cases?

Completely unprepared  
 Somewhat unprepared  
 Neither unprepared or prepared  
 Somewhat prepared  
 Very prepared

How do you feel the care received by patients who are NOT presenting with either symptoms or a diagnosis of COVID-19 is?

Significantly worse than before Covid-19  
 Slightly worse than before Covid-19  
 The same as before Covid-19  
 Slightly better than before Covid-19  
 Significantly better than before Covid-19

How many suspected cases of COVID-19 have you had direct clinical contact with since March 1st 2020?

0  
 1-5  
 6-10  
 11-15  
 16-20  
 21-25  
 26-30  
 31-35  
 > 36

As far as you are aware, how many of these suspected cases have turned out to be confirmed cases of COVID-19?

0  
 1-5  
 6-10  
 11-15  
 16-20  
 21-25  
 26-30  
 31-35  
 > 36

**Personal Factors**

Are you concerned that the exposure to the COVID-19 outbreak may increase symptoms of any established medical health conditions?

- Yes  
 No  
 Prefer not to disclose  
 I do not have an established medical condition

Are you concerned that the exposure to the COVID-19 outbreak may increase symptoms of any established mental health conditions?

- Yes  
 No  
 Prefer not to disclose  
 I do not have an established mental health condition

I feel that my personal health is at risk during the COVID-19 outbreak due to my clinical role?

- Strongly disagree  
 Disagree  
 Neither agree nor disagree  
 Agree  
 Strongly agree

How worried are you about the potential risks if you were to become infected with COVID-19?

- Extremely worried  
 Generally worried  
 Neither worried or not worried  
 Generally not worried  
 Not worried at all

How worried are you about the potential risks to your family, loved ones or others due to your clinical role in the COVID-19 outbreak?

- Extremely worried  
 Generally worried  
 Neither worried or not worried  
 Generally not worried  
 Not worried at all

1 **PERA Questions: Self-isolate**

2  
3 Have you had to self-isolate?  Yes  
4  No

5  
6 For what reason did you have to self-isolate?  Personal symptoms  
7  Personal diagnosis of COVID-19  
8  Symptoms of a member of the household  
9  Exposure to a positive case of COVID-19 in the  
10 work environment  
11  Exposure to a positive case of COVID-19 in your  
12 personal environment  
13  Other (eg return from travel to high risk area)

14  
15 Other - please specify \_\_\_\_\_  
16  
17

18 How many clinical shifts in your rota have you missed  0  
19 due to self-isolation?  1  
20  2  
21  3  
22  4  
23  5-7  
24  8-10  
25  >10

26  
27 Date survey completed \_\_\_\_\_  
28  
29  
30  
31  
32  
33  
34  
35  
36  
37  
38  
39  
40  
41  
42  
43  
44  
45  
46  
47  
48  
49  
50  
51  
52  
53  
54  
55  
56  
57  
58  
59  
60

## CERA Survey 2

Thank you for taking the time to complete the CERA survey part 2.

This is part 2 of the CERA study. Thank you for taking the time to fill out the questions below. It will take between 5 to 7 minutes.

We recommend using either a tablet or computer screen but the questions are accessible via mobile phones.

The Impact of Events Scale - Revised (page 3) should be answered in reference to the COVID-19 peak and your feelings over the last 7 days. All other questions should be answered in reference to the COVID-19 peak and your feelings over the past few weeks.

The definition of COVID-19 "peak", for the purpose of this study, uses nationally reported hospital death figures. This has been estimated between April 10th - April 15th. It is understood this will vary regionally.

Finally, we understand that throughout the COVID-19 pandemic many of you may have experienced very challenging events both in your personal and professional lives. We thank you for taking the time to complete this study and hope it offers an anonymised opportunity to report the psychological impact of this pandemic. If you need any further support there are details highlighted in the participant information leaflet that can be downloaded below.

If you want to download the participant information leaflet, which outlines the study and available support, please download below.

[Attachment: "CERA PIS V 1.1.docx"]

I consent to taking part in CERA survey 2.

- Yes  
 No

What is your ethnicity?

- English / Welsh / Scottish / Northern Irish / British  
 Irish  
 Gypsy or Irish Traveller  
 Any other White background  
 White and Black Caribbean  
 White and Black African  
 White and Asian  
 Any other Mixed / Multiple ethnic background  
 Indian  
 Pakistani  
 Bangladeshi  
 Chinese  
 Any other Asian background  
 African  
 Caribbean  
 Any other Black / African / Caribbean background  
 Arab  
 Any other ethnic group  
 Prefer not to disclose

**Impact of Events Scale - Revised**

**Below is a list of difficulties people sometimes have after stressful life events. Please read each item, and then indicate how distressing each difficulty has been for you DURING THE PAST SEVEN DAYS with respect to the COVID-19 PANDEMIC PEAK.**

**How much have you been distressed or bothered by these difficulties?**

|                                                                                                                       | Not at all            | A little bit          | Moderately            | Quite a bit           | Extremely             |
|-----------------------------------------------------------------------------------------------------------------------|-----------------------|-----------------------|-----------------------|-----------------------|-----------------------|
| Any reminder brought back feelings about it                                                                           | <input type="radio"/> |
| I had trouble staying asleep                                                                                          | <input type="radio"/> |
| Other things kept me thinking about it                                                                                | <input type="radio"/> |
| I felt irritable and angry                                                                                            | <input type="radio"/> |
| I avoided letting myself get upset when I thought about it or was reminded of it                                      | <input type="radio"/> |
| I thought about it when I didn't mean to                                                                              | <input type="radio"/> |
| I felt as if it hadn't happened or wasn't real                                                                        | <input type="radio"/> |
| I stayed away from reminders of it                                                                                    | <input type="radio"/> |
| Pictures about it popped into my head                                                                                 | <input type="radio"/> |
| I was jumpy and easily startled                                                                                       | <input type="radio"/> |
| I tried not to think about it                                                                                         | <input type="radio"/> |
| I was aware that I still had a lot of feelings about it, but I didn't deal with them                                  | <input type="radio"/> |
| My feelings about it were kind of numb                                                                                | <input type="radio"/> |
| I found myself acting or feeling like I was back at that time                                                         | <input type="radio"/> |
| I had trouble falling asleep                                                                                          | <input type="radio"/> |
| I had waves of strong feelings about it                                                                               | <input type="radio"/> |
| I tried to remove it from my memory                                                                                   | <input type="radio"/> |
| I had trouble concentrating                                                                                           | <input type="radio"/> |
| Reminders of it caused me to have physical reactions, such as sweating, trouble breathing, nausea or a pounding heart | <input type="radio"/> |

- |   |                              |                       |                       |                       |                       |                       |
|---|------------------------------|-----------------------|-----------------------|-----------------------|-----------------------|-----------------------|
| 1 | I had dreams about it        | <input type="radio"/> |
| 2 | I felt watchful and on-guard | <input type="radio"/> |
| 3 |                              |                       |                       |                       |                       |                       |
| 4 | I tried not to talk about it | <input type="radio"/> |

- 5
- 6
- 7
- 8
- 9
- 10
- 11
- 12
- 13
- 14
- 15
- 16
- 17
- 18
- 19
- 20
- 21
- 22
- 23
- 24
- 25
- 26
- 27
- 28
- 29
- 30
- 31
- 32
- 33
- 34
- 35
- 36
- 37
- 38
- 39
- 40
- 41
- 42
- 43
- 44
- 45
- 46
- 47
- 48
- 49
- 50
- 51
- 52
- 53
- 54
- 55
- 56
- 57
- 58
- 59
- 60

For peer review only

**Personal Protective Equipment (PPE) and General Training**

**What training have you received in regards to personal protective equipment (PPE) since the COVID-19 outbreak was declared? (select all that apply)**

|                                                                             | No training              | Formal instructional video | Written instruction      | Simulation training      | Departmental guidance    | Other                    |
|-----------------------------------------------------------------------------|--------------------------|----------------------------|--------------------------|--------------------------|--------------------------|--------------------------|
| Donning and doffing (gloves, gown, facemask, eye protection)                | <input type="checkbox"/> | <input type="checkbox"/>   | <input type="checkbox"/> | <input type="checkbox"/> | <input type="checkbox"/> | <input type="checkbox"/> |
| Formal fit testing for mask                                                 | <input type="checkbox"/> | <input type="checkbox"/>   | <input type="checkbox"/> | <input type="checkbox"/> | <input type="checkbox"/> | <input type="checkbox"/> |
| PPE training for exposure to aerosol generating procedure (e.g. intubation) | <input type="checkbox"/> | <input type="checkbox"/>   | <input type="checkbox"/> | <input type="checkbox"/> | <input type="checkbox"/> | <input type="checkbox"/> |

What practical education have you received in regards to the clinical care of patients presenting with suspected/diagnosed COVID-19? (select all that apply)

None  
 Simulation training of a possible case  
 Simulation training of a case requiring aerosol generating procedure  
 Other

You have selected other, please specify.

\_\_\_\_\_

How confident do you feel in the infection control training that has been provided to you?

Not confident at all  
 Somewhat not confident  
 Neither not confident or confident  
 Somewhat confident  
 Very confident

How prepared do you feel to provide direct care to suspected cases?

Completely unprepared  
 Somewhat unprepared  
 Neither unprepared or prepared  
 Somewhat prepared  
 Very prepared

How do you feel the care received by patients who are NOT presenting with either symptoms or a diagnosis of COVID-19 is?

Significantly worse than before Covid-19  
 Slightly worse than before Covid-19  
 The same as before Covid-19  
 Slightly better than before Covid-19  
 Significantly better than before Covid-19

Have you been deployed to a different clinical area as a result of the COVID-19 outbreak?

Yes  
 No

Where have you been redeployed to?

Emergency Department (adult or paediatric)  
 Anaesthetic Department (adult or paediatric)  
 Intensive Care Department (adult or paediatric)  
 Acute Medical Unit  
 Hospital ward (adult or paediatric)  
 Other

You have selected other, please specify.

\_\_\_\_\_

1 How satisfied are you with this redeployment?  Very dissatisfied  
2  Somewhat dissatisfied  
3  Neither satisfied nor dissatisfied  
4  Somewhat satisfied  
5  Very satisfied  
6

7 In survey 1, you stated you had been re-deployed. How  
8 satisfied are you with this redeployment now?  Very dissatisfied  
9  Somewhat dissatisfied  
10  Neither satisfied nor dissatisfied  
11  Somewhat satisfied  
12  Very satisfied  
13  I am no longer re-deployed

14 How many suspected cases of COVID-19 have you had  
15 direct clinical contact with since March 1st 2020?  0  
16  1-5  
17  6-10  
18  11-15  
19  16-20  
20  21-25  
21  26-30  
22  31-35  
23  > 36

24 As far as you are aware, how many of these suspected  
25 cases have turned out to be confirmed cases of  
26 COVID-19?  0  
27  1-5  
28  6-10  
29  11-15  
30  16-20  
31  21-25  
32  26-30  
33  31-35  
34  > 36

35 How many patients have you witnessed dying with  
36 COVID-19?  0  
37  1-5  
38  6-10  
39  11-15  
40  16-20  
41  21-25  
42  26-30  
43  31-35  
44  > 36  
45  
46  
47  
48  
49  
50  
51  
52  
53  
54  
55  
56  
57  
58  
59  
60



**Personal Factors**

Do you have a pre-existing physical health condition(s) that may increase your chances of suffering more severe COVID-19 disease?

- Yes  
 No  
 Prefer not to disclose

Are you concerned that the exposure to the COVID-19 outbreak may increase symptoms of any established mental health conditions?

- Yes  
 No  
 Prefer not to disclose  
 I do not have an established mental health condition

Over the course of your life prior to the recent pandemic, have you experienced what you would characterise as a significant trauma?

- Yes  
 No

During the COVID-19 pandemic, have you felt at high risk of dying/death?

- Yes  
 No

I feel that my personal health is at risk during the COVID-19 outbreak due to my clinical role?

- Strongly disagree  
 Disagree  
 Neither agree nor disagree  
 Agree  
 Strongly agree

How worried are you about the potential risks if you were to become infected with COVID-19?

- Extremely worried  
 Generally worried  
 Neither worried or not worried  
 Generally not worried  
 Not worried at all

How worried are you about the potential risks to your family, loved ones or others due to your clinical role in the COVID-19 outbreak?

- Extremely worried  
 Generally worried  
 Neither worried or not worried  
 Generally not worried  
 Not worried at all

Have any of your family, friends or loved ones become unwell or died due to COVID-19 or its complications? (select all that apply)

- Unwell at home  
 Unwell and required ward level/HDU hospital treatment  
 Unwell and required ICU treatment  
 Died  
 None of the above

Have any of your colleagues become unwell or died due to COVID-19 or its complications? (select all that apply)

- Unwell at home  
 Unwell and required ward level/HDU hospital treatment  
 Unwell and required ICU treatment  
 Died  
 None of the above

In the last 2 weeks I have felt well supported by friends and family

- Strongly disagree  
 Disagree  
 Neither agree nor disagree  
 Agree  
 Strongly agree

1 In the last 2 weeks I have felt well supported by the  
2 senior clinical leadership team

- Strongly disagree
- Disagree
- Neither agree nor disagree
- Agree
- Strongly agree

3  
4  
5  
6  
7  
8  
9  
10  
11  
12  
13  
14  
15  
16  
17  
18  
19  
20  
21  
22  
23  
24  
25  
26  
27  
28  
29  
30  
31  
32  
33  
34  
35  
36  
37  
38  
39  
40  
41  
42  
43  
44  
45  
46  
47  
48  
49  
50  
51  
52  
53  
54  
55  
56  
57  
58  
59  
60

For peer review only

**Personal Coronavirus**

Have you received a positive diagnosis of Coronavirus during this pandemic?  Yes  
 No

Have you been admitted to hospital due to your diagnosis of Coronavirus?  Yes  
 No

Have you had to self-isolate?  Yes  
 No

For what reason did you have to self-isolate? (select all that apply)

- Personal symptoms
- Personal diagnosis of COVID-19
- Symptoms of a member of the household
- Exposure to a positive case of COVID-19 in the work environment
- Exposure to a positive case of COVID-19 in your personal environment
- Other (eg return from travel to high risk area)

How many clinical shifts in your rota have you missed due to self-isolation?  0  
 1  
 2  
 3  
 4  
 5-7  
 8-10  
 >10

Have you been offered any of the following psychological interventions via your current place of work? (Select all that apply)

- Structured individual therapy with a therapist (in person/on telephone)
- Advice line / helpline
- Internet based psychological intervention
- Well-being app / website
- Brief TRiM / "safe space" session (trauma risk management)
- Other please state

Other, please specify \_\_\_\_\_

During your time working in the COVID-19 pandemic have you experienced any of the following? (Select all that apply)

- Feelings that you made a contribution
- A sense of personal accomplishment
- Improved confidence and self esteem
- Increased compassion
- Re-evaluation of self and purpose
- Work satisfaction
- A sense of team cohesion

Would you be happy to be contacted about any further COVID-19 related research focusing on the psychological impact on Doctors?  Yes  
 No

## CERA Survey 3

Please complete the survey below.

Thank you!

---

This is part 3 of the CERA study. Thank you for taking the time to fill out the questions below. It will take between 5 to 7 minutes.

We recommend using either a tablet or computer screen but the questions are accessible via mobile phones.

All questions should be answered in reference to the COVID-19 pandemic. The Impact of Events Scale - Revised, should be answered in reference to your feelings over the last 7 days and all other questions should be answered in reference to your feelings over the past few weeks.

Finally, we understand that throughout the COVID-19 pandemic many of you may have experienced very challenging events both in your personal and professional lives. We thank you for taking the time to complete this study and hope it offers an anonymised opportunity to report the psychological impact of this pandemic. If you need any further support there are details highlighted in the participant information leaflet that can be downloaded below.

---

If you want to download the participant information leaflet, which outlines the study and available support, please download below.

[Attachment: "CERA PIS V 1.1.docx"]

---

I consent to taking part in CERA survey 3.

- Yes  
 No

**Impact of Events Scale - Revised**

**Below is a list of difficulties people sometimes have after stressful life events. Please read each item, and then indicate how distressing each difficulty has been for you DURING THE PAST SEVEN DAYS with respect to the COVID-19 PANDEMIC.**

**How much have you been distressed or bothered by these difficulties?**

|                                                                                                                       | Not at all            | A little bit          | Moderately            | Quite a bit           | Extremely             |
|-----------------------------------------------------------------------------------------------------------------------|-----------------------|-----------------------|-----------------------|-----------------------|-----------------------|
| Any reminder brought back feelings about it                                                                           | <input type="radio"/> |
| I had trouble staying asleep                                                                                          | <input type="radio"/> |
| Other things kept me thinking about it                                                                                | <input type="radio"/> |
| I felt irritable and angry                                                                                            | <input type="radio"/> |
| I avoided letting myself get upset when I thought about it or was reminded of it                                      | <input type="radio"/> |
| I thought about it when I didn't mean to                                                                              | <input type="radio"/> |
| I felt as if it hadn't happened or wasn't real                                                                        | <input type="radio"/> |
| I stayed away from reminders of it                                                                                    | <input type="radio"/> |
| Pictures about it popped into my head                                                                                 | <input type="radio"/> |
| I was jumpy and easily startled                                                                                       | <input type="radio"/> |
| I tried not to think about it                                                                                         | <input type="radio"/> |
| I was aware that I still had a lot of feelings about it, but I didn't deal with them                                  | <input type="radio"/> |
| My feelings about it were kind of numb                                                                                | <input type="radio"/> |
| I found myself acting or feeling like I was back at that time                                                         | <input type="radio"/> |
| I had trouble falling asleep                                                                                          | <input type="radio"/> |
| I had waves of strong feelings about it                                                                               | <input type="radio"/> |
| I tried to remove it from my memory                                                                                   | <input type="radio"/> |
| I had trouble concentrating                                                                                           | <input type="radio"/> |
| Reminders of it caused me to have physical reactions, such as sweating, trouble breathing, nausea or a pounding heart | <input type="radio"/> |

- 1 I had dreams about it
- 2 I felt watchful and on-guard
- 3
- 4 I tried not to talk about it

- 5
- 6
- 7
- 8
- 9
- 10
- 11
- 12
- 13
- 14
- 15
- 16
- 17
- 18
- 19
- 20
- 21
- 22
- 23
- 24
- 25
- 26
- 27
- 28
- 29
- 30
- 31
- 32
- 33
- 34
- 35
- 36
- 37
- 38
- 39
- 40
- 41
- 42
- 43
- 44
- 45
- 46
- 47
- 48
- 49
- 50
- 51
- 52
- 53
- 54
- 55
- 56
- 57
- 58
- 59
- 60

For peer review only

**Occupational Factors**

How confident do you feel in the infection control training that has been provided to you?

- Not confident at all  
 Somewhat not confident  
 Neither not confident or confident  
 Somewhat confident  
 Very confident

How prepared do you feel to provide direct care to suspected cases?

- Completely unprepared  
 Somewhat unprepared  
 Neither unprepared or prepared  
 Somewhat prepared  
 Very prepared

How do you feel the care received by patients who are NOT presenting with either symptoms or a diagnosis of COVID-19 is?

- Significantly worse than before Covid-19  
 Slightly worse than before Covid-19  
 The same as before Covid-19  
 Slightly better than before Covid-19  
 Significantly better than before Covid-19

Have you been deployed back to your usual clinical area after re-deployment?

- Yes  
 No

How many suspected cases of COVID-19 have you had direct clinical contact with since March 1st 2020?

- 0  
 1-5  
 6-10  
 11-15  
 16-20  
 21-25  
 26-30  
 31-35  
 > 36

As far as you are aware, how many of these suspected cases have turned out to be confirmed cases of COVID-19?

- 0  
 1-5  
 6-10  
 11-15  
 16-20  
 21-25  
 26-30  
 31-35  
 > 36

How many patients have you witnessed dying with COVID-19?

- 0  
 1-5  
 6-10  
 11-15  
 16-20  
 21-25  
 26-30  
 31-35  
 > 36

**Personal Factors**

Do you feel exposure to the COVID-19 pandemic has increased symptoms of any established mental health condition(s) you have personally?

- Yes  
 No  
 Prefer not to disclose  
 I do not have an established mental health condition

Do you feel exposure to the COVID-19 pandemic has increased symptoms of any established physical health condition(s) you have personally?

- Yes  
 No  
 Prefer not to disclose  
 I do not have an established physical health condition

During the COVID-19 pandemic, have you felt at high risk of dying/death?

- Yes  
 No

I feel that my personal health is at risk during the COVID-19 outbreak due to my clinical role?

- Strongly disagree  
 Disagree  
 Neither agree nor disagree  
 Agree  
 Strongly agree

How worried are you about the potential risks if you were to become infected with COVID-19?

- Extremely worried  
 Generally worried  
 Neither worried or not worried  
 Generally not worried  
 Not worried at all

How worried are you about the potential risks to your family, loved ones or others due to your clinical role in the COVID-19 outbreak?

- Extremely worried  
 Generally worried  
 Neither worried or not worried  
 Generally not worried  
 Not worried at all

Have any of your family, friends, or loved ones become unwell or died due to COVID-19 or its complications? (select all that apply)

- Unwell at home  
 Unwell and required non-ICU hospital treatment  
 Unwell and required ICU treatment  
 Died

Have any of your colleagues become unwell or died due to COVID-19 or its complications? (select all that apply)

- Unwell at home  
 Unwell and required non-ICU hospital treatment  
 Unwell and required ICU treatment  
 Died

In the last 2 weeks I have felt well supported by friends and family

- Strongly disagree  
 Disagree  
 Neither agree nor disagree  
 Agree  
 Strongly agree



1 In the last 2 weeks I have felt well supported by the  
2 senior clinical leadership team

- Strongly disagree
- Disagree
- Neither agree nor disagree
- Agree
- Strongly agree

For peer review only

**Personal Coronavirus**

Have you received a positive diagnosis of Coronavirus during this pandemic?  Yes  
 No

Have you been admitted to hospital due to your diagnosis of Coronavirus?  Yes  
 No

Have you had to self-isolate?  Yes  
 No

For what reason did you have to self-isolate? (select all that apply)

- Personal symptoms
- Personal diagnosis of COVID-19
- Symptoms of a member of the household
- Exposure to a positive case of COVID-19 in the work environment
- Exposure to a positive case of COVID-19 in your personal environment
- Other (eg return from travel to high risk area)

How many clinical shifts in your rota have you missed due to self-isolation?

- 0
- 1
- 2
- 3
- 4
- 5-7
- 8-10
- >10

Have you had a COVID-19 antibody test?  Yes  
 No  
 Prefer not to disclose

What was the result of your COVID-19 antibody test

- Positive
- Negative
- I have not yet received the result
- Prefer not to disclose

Have you been offered any of the following psychological interventions via your current place of work? (Select all that apply)

- Structured individual therapy with a therapist (in person/on telephone)
- Advice line / helpline
- Internet based psychological intervention
- Well-being app / website
- Brief TRiM / "safe space" session (trauma risk management)
- Other please state

Other, please specify

---

During your time working in the COVID-19 pandemic have you experienced any of the following? (Select all that apply)

- Feelings that you made a contribution
- A sense of personal accomplishment
- Improved confidence and self esteem
- Increased compassion
- Re-evaluation of self and purpose
- Work satisfaction
- A sense of team cohesion

---

1 Have you experienced any other factors during the  
2 COVID-19 pandemic that have made a positive impact  
3 on your psychological health? \_\_\_\_\_  
4  
5  
6  
7  
8  
9  
10  
11  
12  
13  
14  
15  
16  
17  
18  
19  
20  
21  
22  
23  
24  
25  
26  
27  
28  
29  
30  
31  
32  
33  
34  
35  
36  
37  
38  
39  
40  
41  
42  
43  
44  
45  
46  
47  
48  
49  
50  
51  
52  
53  
54  
55  
56  
57  
58  
59  
60

For peer review only

1 **The last 3 questions are optional and not related to the CERA study but will inform future**  
2 **planning for psychological interventions.**  
3

4  
5 **We would like to know more about the type of psychological support doctors prefer. If you**  
6 **needed psychological support in relation to the impact from the COVID-19 pandemic, what**  
7 **would your preferences be in relation to:**  
8

9  
10 a) Format

- Face to face individual
- Face to face group therapy
- Individual online therapy
- Online support groups
- Self help
- Guided self help

11  
12  
13  
14  
15  
16  
17 b) Timing

- Immediate support during the COVID-19 pandemic
- Immediately after the COVID-19 pandemic
- After the COVID-19 pandemic following a period of rest and recuperation

18  
19  
20  
21  
22 c) Mode of therapy

- Structured therapy e.g. CBT
- Counselling
- Peer support
- Other

23  
24  
25  
26  
27 Please specify  
28  
29  
30  
31  
32  
33  
34  
35  
36  
37  
38  
39  
40  
41  
42  
43  
44  
45  
46  
47  
48  
49  
50  
51  
52  
53  
54  
55  
56  
57  
58  
59  
60

1  
2  
3  
4  
5  
6  
7  
8  
9  
10  
11  
12

**Psychological distress during the acceleration phase of the COVID-19 pandemic: a survey of doctors practising in Emergency Medicine, Anaesthesia and Intensive Care Medicine in the United Kingdom and Republic of Ireland**

13  
14  
15  
16  
17  
18  
19  
20  
21  
22

Research Checklist: The Checklist for Reporting Results of Internet E-Surveys (CHERRIES)

13  
14  
15  
16

**CHERRIES CHECKLIST ADAPTED FROM:**  
Eysenbach, Gunther. "Improving the quality of Web surveys: the Checklist for Reporting Results of Internet E-Surveys (CHERRIES)." *Journal of medical Internet research* vol. 6,3 e34. 29 Sep. 2004, doi:10.2196/jmir.6.3.e34

| <b>Item Category</b>                                                                        | <b>Checklist Item</b>            | <b>Explanation</b>                                                                                                                                                                                                   | <b>Checklist Response</b>                                                                                                                                                                                                                                                                                       |
|---------------------------------------------------------------------------------------------|----------------------------------|----------------------------------------------------------------------------------------------------------------------------------------------------------------------------------------------------------------------|-----------------------------------------------------------------------------------------------------------------------------------------------------------------------------------------------------------------------------------------------------------------------------------------------------------------|
| <b>Design</b>                                                                               | Describe survey design           | Describe target population, sample frame. Is the sample a convenience sample? (In "open" surveys this is most likely.)                                                                                               | <b>Outlined in 'Methods'</b>                                                                                                                                                                                                                                                                                    |
| <b>IRB (Institutional Review Board) approval and informed consent process</b>               | IRB approval                     | Mention whether the study has been approved by an IRB.                                                                                                                                                               | <b>Outlined in 'Procedures'</b>                                                                                                                                                                                                                                                                                 |
|                                                                                             | Informed consent                 | Describe the informed consent process. Where were the participants told the length of time of the survey, which data were stored and where and for how long, who the investigator was, and the purpose of the study? | <b>Outlined in 'Participants and Procedures'</b>                                                                                                                                                                                                                                                                |
|                                                                                             | Data protection                  | If any personal information was collected or stored, describe what mechanisms were used to protect unauthorized access.                                                                                              | <b>Outlined in 'Procedures'</b>                                                                                                                                                                                                                                                                                 |
| <b>Development and pre-testing</b>                                                          | Development and testing          | State how the survey was developed, including whether the usability and technical functionality of the electronic questionnaire had been tested before fielding the questionnaire.                                   | <b>Available in the published protocol</b><br>(Roberts T, Daniels J, Hulme W, et al. COVID-19 emergency response assessment study: a prospective longitudinal survey of frontline doctors in the UK and Ireland: study protocol. <i>BMJ Open</i> Published Online First: 2020. doi:10.1136/bmjopen-2020-039851) |
| <b>Recruitment process and description of the sample having access to the questionnaire</b> | Open survey versus closed survey | An "open survey" is a survey open for each visitor of a site, while a closed survey is only open to a sample which the investigator knows (password-protected survey).                                               | <b>Outlined in 'Procedures' + protocol</b>                                                                                                                                                                                                                                                                      |
|                                                                                             | Contact mode                     | Indicate whether or not the initial contact with the potential participants was made on the Internet. (Investigators may also send out questionnaires by mail and allow for Web-based data entry.)                   | <b>Outlined in 'Procedures' + protocol</b>                                                                                                                                                                                                                                                                      |
|                                                                                             | Advertising the survey           | How/where was the survey announced or advertised? Some examples are                                                                                                                                                  | <b>Outlined in 'Procedures' + protocol</b>                                                                                                                                                                                                                                                                      |

23  
24  
25  
26  
27  
28  
29  
30  
31  
32  
33  
34  
35  
36  
37  
38  
39  
40  
41  
42  
43  
44  
45  
46  
47  
48  
49  
50  
51  
52  
53  
54  
55  
56  
57  
58  
59  
60

|                              |                                          |                                                                                                                                                                                                                                                                                                                                                                                                                                              |                                                                                                                            |
|------------------------------|------------------------------------------|----------------------------------------------------------------------------------------------------------------------------------------------------------------------------------------------------------------------------------------------------------------------------------------------------------------------------------------------------------------------------------------------------------------------------------------------|----------------------------------------------------------------------------------------------------------------------------|
|                              |                                          | offline media (newspapers), or online (mailing lists – If yes, which ones?) or banner ads (Where were these banner ads posted and what did they look like?). It is important to know the wording of the announcement as it will heavily influence who chooses to participate. Ideally the survey announcement should be published as an appendix.                                                                                            |                                                                                                                            |
| <b>Survey administration</b> | Web/E-mail                               | State the type of e-survey (eg, one posted on a Web site, or one sent out through e-mail). If it is an e-mail survey, were the responses entered manually into a database, or was there an automatic method for capturing responses?                                                                                                                                                                                                         | <b>Outlined in ‘Procedures’ + protocol</b>                                                                                 |
|                              | Context                                  | Describe the Web site (for mailing list/newsgroup) in which the survey was posted. What is the Web site about, who is visiting it, what are visitors normally looking for? Discuss to what degree the content of the Web site could pre-select the sample or influence the results. For example, a survey about vaccination on a anti-immunization Web site will have different results from a Web survey conducted on a government Web site | <b>Outlined in ‘Procedures’ + protocol</b>                                                                                 |
|                              | Mandatory/voluntary                      | Was it a mandatory survey to be filled in by every visitor who wanted to enter the Web site, or was it a voluntary survey?                                                                                                                                                                                                                                                                                                                   | <ul style="list-style-type: none"> <li>- <b>Outlined in ‘Procedures’ + protocol</b></li> <li>- <b>voluntary</b></li> </ul> |
|                              | Incentives                               | Were any incentives offered (eg, monetary, prizes, or non-monetary incentives such as an offer to provide the survey results)?                                                                                                                                                                                                                                                                                                               | <b>No</b>                                                                                                                  |
|                              | Time/Date                                | In what timeframe were the data collected?                                                                                                                                                                                                                                                                                                                                                                                                   | <b>Outlined in ‘Procedures’ + protocol + Protocol</b>                                                                      |
|                              | Randomization of items or questionnaires | To prevent biases items can be randomized or alternated.                                                                                                                                                                                                                                                                                                                                                                                     | <b>Not done due to maximise completion of the GHQ-12</b>                                                                   |
|                              | Adaptive questioning                     | Use adaptive questioning (certain items, or only conditionally displayed based on responses to other items) to reduce number and complexity of the questions                                                                                                                                                                                                                                                                                 | <b>Outlined in protocol but yes ‘branching logic’ was used where appropriate</b>                                           |
|                              | Number of Items                          | What was the number of questionnaire items per page? The number of items is an important factor for the completion rate.                                                                                                                                                                                                                                                                                                                     | <b>Outlined in ‘online supplementary 2,3,4’</b>                                                                            |
|                              | Number of screens (pages)                | Over how many pages was the questionnaire distributed? The number of items is an important factor for the completion rate.                                                                                                                                                                                                                                                                                                                   | <b>Outlined in ‘online supplementary 2,3,4’</b>                                                                            |
|                              | Completeness check                       | It is technically possible to do consistency or completeness checks before the questionnaire is submitted.                                                                                                                                                                                                                                                                                                                                   | <b>There were no completeness checks. The only mandatory items</b>                                                         |

|                       |                                                                                                           |                                                                                                                                                                                                                                                                                                                                                                                                                                                                                                                                |                                                                                                                                                                                                                                                                                                                                        |
|-----------------------|-----------------------------------------------------------------------------------------------------------|--------------------------------------------------------------------------------------------------------------------------------------------------------------------------------------------------------------------------------------------------------------------------------------------------------------------------------------------------------------------------------------------------------------------------------------------------------------------------------------------------------------------------------|----------------------------------------------------------------------------------------------------------------------------------------------------------------------------------------------------------------------------------------------------------------------------------------------------------------------------------------|
|                       |                                                                                                           | Was this done, and if “yes”, how (usually JavaScript)? An alternative is to check for completeness after the questionnaire has been submitted (and highlight mandatory items). If this has been done, it should be reported. All items should provide a non-response option such as “not applicable” or “rather not say”, and selection of one response option should be enforced.                                                                                                                                             | <b>were consent and email address. The decision not to include mandatory items and/or completeness checks was made due to a concern that mandatory items would increase rates of non-completion</b>                                                                                                                                    |
|                       | Review step                                                                                               | State whether respondents were able to review and change their answers (eg, through a Back button or a Review step which displays a summary of the responses and asks the respondents if they are correct).                                                                                                                                                                                                                                                                                                                    | <b>This was possible but has not been included in the manuscript</b>                                                                                                                                                                                                                                                                   |
| <b>Response rates</b> | Unique site visitor                                                                                       | If you provide view rates or participation rates, you need to define how you determined a unique visitor. There are different techniques available, based on IP addresses or cookies or both.                                                                                                                                                                                                                                                                                                                                  | <b>Outlined in ‘Figure 1’. Each access to the 1<sup>st</sup> survey page 1 was identified as a new unique visit, this was not limited by IP address or cookies</b>                                                                                                                                                                     |
|                       | View rate (Ratio of unique survey visitors/unique site visitors)                                          | Requires counting unique visitors to the first page of the survey, divided by the number of unique site visitors (not page views!). It is not unusual to have view rates of less than 0.1 % if the survey is voluntary                                                                                                                                                                                                                                                                                                         | <b>Survey site contains first page of survey therefore N/A</b>                                                                                                                                                                                                                                                                         |
|                       | Participation rate (Ratio of unique visitors who agreed to participate/unique first survey page visitors) | Count the unique number of people who filled in the first survey page (or agreed to participate, for example by checking a checkbox), divided by visitors who visit the first page of the survey (or the informed consents page, if present). This can also be called “recruitment” rate.                                                                                                                                                                                                                                      | <b>Outlined in ‘Figure 1’</b>                                                                                                                                                                                                                                                                                                          |
|                       | Completion rate (Ratio of users who finished the survey/users who agreed to participate)                  | The number of people submitting the last questionnaire page, divided by the number of people who agreed to participate (or submitted the first survey page). This is only relevant if there is a separate “informed consent” page or if the survey goes over several pages. This is a measure for attrition. Note that “completion” can involve leaving questionnaire items blank. This is not a measure for how completely questionnaires were filled in. (If you need a measure for this, use the word “completeness rate”.) | <b>Outlined in ‘Figure 1’</b>                                                                                                                                                                                                                                                                                                          |
|                       | <b>Preventing multiple entries from the same individual</b>                                               | Cookies used                                                                                                                                                                                                                                                                                                                                                                                                                                                                                                                   | Indicate whether cookies were used to assign a unique user identifier to each client computer. If so, mention the page on which the cookie was set and read, and how long the cookie was valid. Were duplicate entries avoided by preventing users access to the survey twice; or were duplicate database entries having the same user |

|                 |                                                     |                                                                                                                                                                                                                                                                                                                                                                                                                                                                                                                                                                            |                                                                                            |
|-----------------|-----------------------------------------------------|----------------------------------------------------------------------------------------------------------------------------------------------------------------------------------------------------------------------------------------------------------------------------------------------------------------------------------------------------------------------------------------------------------------------------------------------------------------------------------------------------------------------------------------------------------------------------|--------------------------------------------------------------------------------------------|
|                 |                                                     | ID eliminated before analysis? In the latter case, which entries were kept for analysis (eg, the first entry or the most recent)?                                                                                                                                                                                                                                                                                                                                                                                                                                          |                                                                                            |
|                 | IP check                                            | Indicate whether the IP address of the client computer was used to identify potential duplicate entries from the same user. If so, mention the period of time for which no two entries from the same IP address were allowed (eg, 24 hours). Were duplicate entries avoided by preventing users with the same IP address access to the survey twice; or were duplicate database entries having the same IP address within a given period of time eliminated before analysis? If the latter, which entries were kept for analysis (eg, the first entry or the most recent)? | <b><i>Not used due to survey being completed on multi-user/single log-in computers</i></b> |
|                 | Log file analysis                                   | Indicate whether other techniques to analyze the log file for identification of multiple entries were used. If so, please describe.                                                                                                                                                                                                                                                                                                                                                                                                                                        | <b><i>Not done</i></b>                                                                     |
|                 | Registration                                        | In “closed” (non-open) surveys, users need to login first and it is easier to prevent duplicate entries from the same user. Describe how this was done. For example, was the survey never displayed a second time once the user had filled it in, or was the username stored together with the survey results and later eliminated? If the latter, which entries were kept for analysis (eg, the first entry or the most recent)?                                                                                                                                          | <b><i>N/A</i></b>                                                                          |
| <b>Analysis</b> | Handling of incomplete questionnaires               | Were only completed questionnaires analyzed? Were questionnaires which terminated early (where, for example, users did not go through all questionnaire pages) also analyzed?                                                                                                                                                                                                                                                                                                                                                                                              | <b><i>Outlined in ‘Statistical Analysis’ + Protocol</i></b>                                |
|                 | Questionnaires submitted with an atypical timestamp | Some investigators may measure the time people needed to fill in a questionnaire and exclude questionnaires that were submitted too soon. Specify the timeframe that was used as a cut-off point, and describe how this point was determined                                                                                                                                                                                                                                                                                                                               | <b><i>All questionnaires have timestamp of completion.</i></b>                             |
|                 | Statistical correction                              | Indicate whether any methods such as weighting of items or propensity scores have been used to adjust for the non-representative sample; if so, please describe the methods.                                                                                                                                                                                                                                                                                                                                                                                               | <b><i>Outlined in ‘Statistical Analysis’ + Protocol</i></b>                                |



# BMJ Open

## Psychological Distress and Trauma in Doctors Providing Frontline Care During the COVID-19 Pandemic in the United Kingdom and Ireland: A Prospective Longitudinal Survey Cohort Study

|                                 |                                                                                                                                                                                                                                                                                                                                                                                                                                                                                                                                                                                                                                                                                                                                                                                                                                                                                                                                                                                                                                                                                                                                                                                                                                                     |
|---------------------------------|-----------------------------------------------------------------------------------------------------------------------------------------------------------------------------------------------------------------------------------------------------------------------------------------------------------------------------------------------------------------------------------------------------------------------------------------------------------------------------------------------------------------------------------------------------------------------------------------------------------------------------------------------------------------------------------------------------------------------------------------------------------------------------------------------------------------------------------------------------------------------------------------------------------------------------------------------------------------------------------------------------------------------------------------------------------------------------------------------------------------------------------------------------------------------------------------------------------------------------------------------------|
| Journal:                        | <i>BMJ Open</i>                                                                                                                                                                                                                                                                                                                                                                                                                                                                                                                                                                                                                                                                                                                                                                                                                                                                                                                                                                                                                                                                                                                                                                                                                                     |
| Manuscript ID                   | bmjopen-2021-049680.R1                                                                                                                                                                                                                                                                                                                                                                                                                                                                                                                                                                                                                                                                                                                                                                                                                                                                                                                                                                                                                                                                                                                                                                                                                              |
| Article Type:                   | Original research                                                                                                                                                                                                                                                                                                                                                                                                                                                                                                                                                                                                                                                                                                                                                                                                                                                                                                                                                                                                                                                                                                                                                                                                                                   |
| Date Submitted by the Author:   | 13-May-2021                                                                                                                                                                                                                                                                                                                                                                                                                                                                                                                                                                                                                                                                                                                                                                                                                                                                                                                                                                                                                                                                                                                                                                                                                                         |
| Complete List of Authors:       | Roberts, Tom; The Royal College of Emergency Medicine, TERN; Bristol Royal Hospital for Children, Emergency Department<br>Daniels, Jo; University of Bath<br>Hulme, William<br>Hirst, Robert; North Bristol NHS Trust, Department of Anaesthesia<br>Horner , Daniel; The Royal College of Emergency Medicine; Salford Royal Hospitals NHS Trust, Department of Intensive Care<br>Lyttle, Mark; Bristol Royal Hospital for Children, Emergency Department; University of the West of England, Faculty of Health and Applied Science<br>Samuel, Katie; North Bristol NHS Trust, Department of Anaesthesia<br>Graham, Blair; University of Plymouth; Plymouth Hospitals NHS Foundation Trust, Emergency Department<br>Reynard, Charles ; The University of Manchester<br>Barrett, Michael; Children's Health Ireland at Crumlin, Emergency Medicine; University College Dublin, School of Medicine<br>Foley, James; University Hospital Waterford, Emergency Department<br>Cronin, John; St Vincent's University Hospital, Emergency Department<br>Umana, Etimbuk; Connolly Hospital Blanchardstown, Emergency Department<br>Vinagre, Joao; College of Anaesthesiologists of Ireland<br>Carlton, Edward; North Bristol NHS Trust, Emergency Department |
| <b>Primary Subject Heading</b>: | Mental health                                                                                                                                                                                                                                                                                                                                                                                                                                                                                                                                                                                                                                                                                                                                                                                                                                                                                                                                                                                                                                                                                                                                                                                                                                       |
| Secondary Subject Heading:      | Anaesthesia, Emergency medicine, Intensive care                                                                                                                                                                                                                                                                                                                                                                                                                                                                                                                                                                                                                                                                                                                                                                                                                                                                                                                                                                                                                                                                                                                                                                                                     |
| Keywords:                       | ACCIDENT & EMERGENCY MEDICINE, Adult anaesthesia < ANAESTHETICS, Adult intensive & critical care < ANAESTHETICS, COVID-19, Adult intensive & critical care < INTENSIVE & CRITICAL CARE, MENTAL HEALTH                                                                                                                                                                                                                                                                                                                                                                                                                                                                                                                                                                                                                                                                                                                                                                                                                                                                                                                                                                                                                                               |
|                                 |                                                                                                                                                                                                                                                                                                                                                                                                                                                                                                                                                                                                                                                                                                                                                                                                                                                                                                                                                                                                                                                                                                                                                                                                                                                     |

SCHOLARONE™  
Manuscripts

1  
2  
3  
4  
5  
6  
7  
8  
9  
10  
11  
12  
13  
14  
15  
16  
17  
18  
19  
20  
21  
22  
23  
24  
25  
26  
27  
28  
29  
30  
31  
32  
33  
34  
35  
36  
37  
38  
39  
40  
41  
42  
43  
44  
45  
46  
47  
48  
49  
50  
51  
52  
53  
54  
55  
56  
57  
58  
59  
60



I, the Submitting Author has the right to grant and does grant on behalf of all authors of the Work (as defined in the below author licence), an exclusive licence and/or a non-exclusive licence for contributions from authors who are: i) UK Crown employees; ii) where BMJ has agreed a CC-BY licence shall apply, and/or iii) in accordance with the terms applicable for US Federal Government officers or employees acting as part of their official duties; on a worldwide, perpetual, irrevocable, royalty-free basis to BMJ Publishing Group Ltd ("BMJ") its licensees and where the relevant Journal is co-owned by BMJ to the co-owners of the Journal, to publish the Work in this journal and any other BMJ products and to exploit all rights, as set out in our [licence](#).

The Submitting Author accepts and understands that any supply made under these terms is made by BMJ to the Submitting Author unless you are acting as an employee on behalf of your employer or a postgraduate student of an affiliated institution which is paying any applicable article publishing charge ("APC") for Open Access articles. Where the Submitting Author wishes to make the Work available on an Open Access basis (and intends to pay the relevant APC), the terms of reuse of such Open Access shall be governed by a Creative Commons licence – details of these licences and which [Creative Commons](#) licence will apply to this Work are set out in our licence referred to above.

Other than as permitted in any relevant BMJ Author's Self Archiving Policies, I confirm this Work has not been accepted for publication elsewhere, is not being considered for publication elsewhere and does not duplicate material already published. I confirm all authors consent to publication of this Work and authorise the granting of this licence.

**Title Page****Psychological Distress and Trauma in Doctors Providing Frontline Care During the COVID-19 Pandemic in the United Kingdom and Ireland: A Prospective Longitudinal Survey Cohort Study**

**Authors:** Tom Roberts<sup>1,2</sup>, Jo Daniels<sup>3</sup>, William Hulme<sup>4</sup>, Robert Hirst<sup>5</sup>, Daniel Horner<sup>1,6</sup>, Mark D Lyttle<sup>2,7</sup>, Katie Samuel<sup>5</sup>, Blair Graham<sup>8,9</sup>, Charles Reynard<sup>10</sup>, Michael J Barrett<sup>11,12</sup>, James Foley<sup>13</sup>, John Cronin<sup>14</sup>, Etimbuk Umana<sup>15</sup>, Joao Vinagre<sup>16</sup> and Edward Carlton<sup>1,17</sup> on behalf of The Trainee Emergency Research Network (TERN), Paediatric Emergency Research in the UK and Ireland (PERUKI), Research and Audit Federation of Trainees (RAFT), Irish Trainee Emergency Research Network (ITERN and Trainee Research in Intensive Care (TRIC))

**Affiliations:**

- 1) The Royal College of Emergency Medicine, London, UK
- 2) Emergency Department, Bristol Royal Hospital for Children, UK
- 3) Department of Psychology, University of Bath, UK
- 4) Statistical Consultant, Oxford, UK
- 5) Department of Anaesthesia, North Bristol NHS Trust, UK
- 6) Emergency Department, Salford Royal Hospital NHS Foundation Trust
- 7) Faculty of Health and Applied Sciences, University of the West of England, Bristol
- 8) Faculty of Health, University of Plymouth, Plymouth, UK.
- 9) Emergency Department, University Hospitals Plymouth, UK
- 10) Department of Cardiovascular Sciences, University of Manchester
- 11) Department of Emergency Medicine, Children's Health Ireland at Crumlin, Ireland
- 12) Women's and Children's Health, School of Medicine, University College Dublin, Ireland
- 13) Emergency Department, University Hospital Waterford, Waterford, Ireland
- 14) Department of Emergency Medicine, St Vincent's University Hospital, Dublin, Ireland
- 15) Emergency Department, Connolly Hospital Blanchardstown, Dublin, Ireland.
- 16) College of Anaesthesiologists of Ireland, Dublin, Ireland
- 17) Emergency Department, North Bristol NHS Trust

**Corresponding Author**

Dr Tom Roberts

Address: 12 Hamilton Road, Bristol, BS3 1PB

Email: [Tomkieranroberts@gmail.com](mailto:Tomkieranroberts@gmail.com)

Telephone: 07894234121

Abstract Word Count: 304

Manuscript Word Count: 3561

## Objectives

The psychological impact of the COVID-19 pandemic on doctors is a significant concern. Due to the emergence of multiple pandemic waves, longitudinal data on the impact of COVID-19 is vital to ensure an adequate psychological care response. The primary aim was to assess the prevalence and degree of psychological distress and trauma in frontline doctors during the acceleration, peak and deceleration of the COVID-19 first wave. Personal and professional factors associated with psychological distress are also reported.

## Design

A prospective online three-part longitudinal survey.

## Setting

Acute hospitals in the UK and Ireland.

## Participants

Frontline doctors working in Emergency Medicine (EM), Anaesthetics and Intensive Care Medicine (ICM) during the first wave of the COVID-19 pandemic in March 2020.

## Primary outcome measures

Psychological distress and trauma measured using the General Health Questionnaire-12 and the Impact of Events-Revised.

## Results

The initial acceleration survey distributed across networks generated a sample of 5440 doctors. Peak and deceleration response rates from the original sample were 71.6% (n=3896) and 56.6% (n=3079) respectively. Prevalence of psychological distress was 44.7% (n=1334) during the acceleration, 36.9% (n=1098) at peak and 31.5% (n=918) at the deceleration phase. The prevalence of trauma was 23.7% (n=647) at peak and 17.7% (n=484) at deceleration. The prevalence of probable post-traumatic stress disorder was 12.6% (n=343) at peak and 10.1% (n=276) at deceleration. Worry of family infection due to clinical work was the factor most strongly associated with both distress ( $R^2 = 0.06$ ) and trauma ( $R^2 = 0.10$ ).

## Conclusion

Findings reflect a pattern of elevated distress at acceleration and peak, with some natural recovery. It is essential that policymakers seek to prevent future adverse effects through (a) provision of vital equipment to mitigate physical and psychological harm (b) increased awareness and recognition of signs of psychological distress and (c) the development of clear pathways to effective psychological care.

1  
2  
3 **Trial Registration:** ISRCTN 10666798

4 **Strength and limitations of this study**

- 5  
6 • This paper presents key findings from a large cross-sectional longitudinal survey of practising  
7 emergency, anaesthetic and intensive care doctors in UK and Ireland during the acceleration,  
8 peak and deceleration of the first wave of the COVID-19 pandemic.  
9  
10 • This study provides an insight into the associated personal and professional factors  
11 associated with trauma and distress and could be utilised to identify those doctors who will  
12 most benefit from psychological interventions.  
13  
14 • Variation in regional peaks may have influenced accurate capturing of psychological distress  
15 and trauma rates and have not been accounted for.  
16  
17 • The findings cannot be extrapolated to longer-term psychological impact, and future work is  
18 planned to capture this.  
19  
20  
21  
22  
23  
24  
25  
26  
27  
28  
29  
30  
31  
32  
33  
34  
35  
36  
37  
38  
39  
40  
41  
42  
43  
44  
45  
46  
47  
48  
49  
50  
51  
52  
53  
54  
55  
56  
57  
58  
59  
60

## Introduction

Clinicians providing frontline care have become central to the primary reception, assessment, and ongoing hospital treatment of patients with suspected Coronavirus Infectious Disease 2019 (COVID-19). These include doctors working in Emergency Medicine (EM), Anaesthetics and Intensive Care Medicine (ICM). Whilst this healthcare workforce is highly resilient and accustomed to facing traumatic situations, the COVID-19 pandemic has imposed unprecedented demands in workload intensity and personal health risk.<sup>1-4</sup> High infection rates have been reported in frontline clinicians, with over 150 fatalities in the UK by May 2020.<sup>5</sup> These factors are likely to affect psychological wellbeing, increasing the risk of traumatic stress both in the acute phase of the pandemic and at long-term follow up.<sup>6-9</sup> Exposure to infectious disease outbreaks and elevated psychological distress have previously been associated with increased sickness rates, absenteeism, impaired performance at work, and the development of physical health problems.<sup>10-12</sup> There is also an emerging evidence base from around the world of the psychological impact on healthcare workers.<sup>13-16</sup> During the current COVID-19 pandemic there has been a global media focus on health and care workers with widespread public support.<sup>17</sup> However, there is increasing recognition amongst key opinion leaders and psychological societies that this pandemic will lead to an unparalleled, though as yet unquantified, impact upon the psychological wellbeing of healthcare workers.<sup>18,19</sup>

Studies evaluating psychological wellbeing in frontline clinicians during infectious disease outbreaks (including COVID-19) have demonstrated negative impacts may be significant.<sup>10,20,21</sup> Systematic reviews and meta-analyses converge around common predictors of psychological distress following traumatic events, many of which are relevant to frontline clinicians. Key factors include preparedness, training, social and occupational support, exposure and threat to life, media use and history of mental health problems.<sup>1,7,21-23</sup> However, these data have largely been collected as a snapshot either during or following outbreaks or as cross-sectional surveys in highly selected or self-selecting cohorts. Longitudinal data which describe evolving and cumulative effects on the psychological wellbeing of frontline working during the COVID-19 pandemic are therefore urgently required. Such studies are essential to understand and mitigate psychological impacts of future events upon this vital workforce and inform the development of policy and interventions.

The primary aim of this study was to assess the prevalence and degree of psychological distress and trauma in doctors providing frontline care during the acceleration, peak and deceleration phases of the COVID-19 pandemic. We also sought to establish which personal and professional factors were significantly associated with psychological distress at these time points.

## Methods

### Study Design and Participants

The “COVID-19 Emergency Response Assessment (CERA) Study” was a prospective online longitudinal survey of frontline doctors across the UK and Ireland undertaken during the acceleration, peak and deceleration phases of the first COVID-19 pandemic wave.<sup>24</sup> Doctors of all grades working in EM, Anaesthetics or ICM during the acceleration phase were invited to participate.

### Procedures

This survey study is reported in line with Checklist for Reporting Results of Internet E-surveys (CHERRIES) guidelines.<sup>25</sup> Full details of survey distribution, design, administration, and time-points are available in the published protocol.<sup>24</sup> In brief, the survey was initially distributed during the acceleration phase of the first pandemic wave through research networks, training faculties or Royal College Networks via email or instant messaging groups, coordinated by identified site/region leads. The participation link was not shared on wider social media platforms, to avoid international contamination. At completion of the acceleration phase survey, participants entered personal email addresses for direct approach at peak and deceleration phases with a unique survey link to avoid duplication. The study was registered at the ISRCTN (10666798).

The acceleration, peak and deceleration surveys were developed iteratively by the study team and underpinned by evidence, or by consensus where necessary. Psychometric tools were selected by consensus of the study team, considering validity and utility of a range of standardised measures, balanced against the feasibility of delivery and completion by individuals likely to be working at maximum capacity.

Study data were collected and managed using REDCap (Research Electronic Data Capture) hosted at University Hospitals Bristol and Weston NHS Foundation Trust.<sup>26,27</sup> Acceleration, peak and deceleration phases were defined a priori and adapted from the United States Centre for Disease Control “Preparedness and Response Frameworks for Influenza Pandemics”.<sup>28</sup> For each survey, exact survey distribution dates were decided per protocol by team consensus according to available public health data on number of confirmed cases (acceleration phase; UK: 18/03/2020 – 26/03/2020, Ireland: 25/03/2020 – 02/04/2020), nationally available COVID-19 daily death rates (peak phase; UK: 21/04/2020 – 05/05/2020, Ireland: 28/04/2020 – 12/05/2020) and at 30 days after distribution of the peak phase survey (deceleration phase; UK: 03/06/2020 – 17/06/2020, Ireland: 10/06/2020 – 24/06/2020). Ethical approval was obtained from the University of Bath (UK) and Children’s Health Ethics Committee (Ireland). Regulatory approval was obtained from the Health Regulation Authority (UK), Health and Care Research Wales. Participants provided electronic informed consent for each survey.

### Survey Questions



1  
2  
3 Survey questions collected data for both the primary and secondary outcomes. Items included the  
4 General Health Questionnaire-12 (GHQ-12; provided with licence fee waived by GL Assessments,  
5 London, UK) for distress, and the Impact of Events Scale- Revised (IES-R; off licence) for trauma.  
6 Personal and professional characteristics relating to participants' current role, and their preparedness  
7 and experiences during the pandemic were collected. These were used as secondary outcome  
8 measures and are provided in full in the protocol and online supplement. <sup>24</sup>  
9  
10  
11  
12

### 13 **Outcomes**

14 There were two co-primary outcomes in this survey: psychological distress, and trauma, as defined by  
15 the GHQ-12 and the IES-R respectively.  
16  
17

#### 18 **Distress – GHQ-12**

19 The GHQ-12 is a 12-item self-report measure devised to screen for psychological distress in the general  
20 population. <sup>29</sup> The measure has high specificity and sensitivity, with reliability demonstrated across a  
21 range of populations. <sup>30,31</sup> The GHQ-12 has been used in similar clinician-based studies measuring the  
22 psychological impact of infectious outbreaks and was chosen due to the brevity of the measure and its  
23 suitability for time-pressured medical staff. <sup>21</sup> The GHQ-12 assesses current state and asks the  
24 participants to compare to usual state. GHQ-12 was asked at all 3 survey phases. Case level distress  
25 is defined as a score of more than 3. <sup>30</sup>  
26  
27  
28  
29  
30  
31

#### 32 **Trauma – IES-R**

33 The IES-R is a 22-item measure commonly used to measure post-traumatic stress following a pre-  
34 specified traumatic incident and has been used to evaluate the impact of infectious disease outbreaks  
35 on hospital staff. <sup>21,32</sup> It contains 8 items that focus on 'intrusion', 8 items on 'avoidance' and 6 items on  
36 'hyperarousal'. The IES-R was used at the peak and deceleration survey phases. A score of 24 or  
37 above indicates a clinically significant traumatic stress response, a score above 33 indicates best cut-  
38 off for a diagnosis of 'probable post-traumatic stress disorder' (PTSD). <sup>33,34</sup>  
39  
40  
41  
42

43 The secondary outcomes captured included personal and professional characteristics and their  
44 association with psychological distress and trauma. These personal and professional factors were  
45 identified through rapid literature review of high-quality systematic reviews and meta-analysis by  
46 experts in pandemic research. <sup>1,21–23</sup> All factors identified as predictors of outcome were retained. This  
47 was supplemented by factors deemed of specific or emerging interest by the expert study steering  
48 committee. These were defined a priori in the study protocol, with the exception of ethnicity which was  
49 added during the peak survey due to the specific emergence of ethnicity as a potential marker of poor  
50 physical health outcomes. <sup>24</sup>  
51  
52  
53  
54  
55

### 56 **Statistical Analysis**

57 The statistical analysis is described in detail in the published protocol. <sup>24</sup> GHQ-12 items were reported  
58 using two methods. In the first method, item responses are assigned to the values 0, 0, 1, 1 (from the  
59  
60

1  
2  
3 most positive to the most negative sentiment) and summed to form an aggregate score from zero  
4 (least distressed) to 12 (most distressed). Using this method, a score of more than 3 is indicative of  
5 case-level distress.<sup>30</sup> The second method assigns responses to 0, 1, 2, 3 (positive to negative  
6 sentiment) producing a score in the range 0 to 36, with zero representing the most healthy response  
7 (no psychological distress) and 36 the most unhealthy (maximal psychological distress). By  
8 presenting the two different scoring methods, we can both report the prevalence of case level distress  
9 across the sample (0-0-1-1 scoring method) and more sensitively detect changes within the sample  
10 over the three phases of the pandemic (0-1-2-3 scoring method).  
11  
12  
13  
14  
15

16 IES-R responses were analysed by assigning the responses to 0, 1, 2, 3, 4 (positive to negative)  
17 producing a score in the range 0 (no trauma) to 88 (maximal trauma). A score of 24 or above indicates  
18 a clinically significant traumatic stress response, a score above 33 indicates best cut-off for a diagnosis  
19 of 'probable post-traumatic stress disorder' (PTSD).<sup>33,34</sup>  
20  
21  
22

23 The change over time in the GHQ-12 (phases 1, 2, and 3) and IES-R scores (phases 2 and 3) amongst  
24 participants who responded to all three surveys was examined with repeated measures linear mixed-  
25 effect models, with survey phase as the single fixed effect and a participant-level random effect. These  
26 model describe the association between pandemic phase and psychological distress (GHQ-12) and  
27 trauma (IES-R).  
28  
29  
30  
31

32 To identify potential modifiers of the change in GHQ-12-score or IES-R-score over time, further models  
33 were constructed for each of the measured personal and professional variables. Each model included  
34 the single variable of interest, survey phase, their interaction (to allow for a change in the association  
35 between the outcome and the variable over time), and a participant-level random effect as before..  
36 Responses where the variable value was missing were removed.<sup>35</sup> Nagakawa's marginal  $R^2$  was used  
37 to measure the proportion of outcome variance accounted for by the model (excluding random-effects,  
38 i.e., when there is no a-priori knowledge of the expected outcome for each participant). Values vary  
39 from 0 to 1, with 1 occurring when the model perfectly predicts the outcome, and 0 occurring when the  
40 model only returns the population average.  
41  
42  
43  
44  
45

46 Finally, a comparison analysis done to compare distress and trauma outcomes in those who completed  
47 all 3 surveys against those who dropped out.  
48  
49

## 50 **Software**

51 All analyses and statistical outputs were produced in the statistical programming language  
52 R and the 'tidyverse', 'lme4' and 'ggeffects' packages were used for the mixed-effects models.<sup>36-38</sup>  
53  
54  
55

## 56 **Patient and Public Involvement**

57  
58  
59  
60

1  
2  
3 The study team contains frontline doctors from all represented specialties who undertook clinical work  
4 throughout the COVID-19 pandemic. This research is in line with recent RCEM research prioritisation  
5 and research recommendations.<sup>39,40</sup>  
6  
7

#### 8 9 **Role of the funding source**

10 The sponsor and funder had no role at any stage of this work.  
11  
12  
13  
14  
15  
16  
17  
18  
19  
20  
21  
22  
23  
24  
25  
26  
27  
28  
29  
30  
31  
32  
33  
34  
35  
36  
37  
38  
39  
40  
41  
42  
43  
44  
45  
46  
47  
48  
49  
50  
51  
52  
53  
54  
55  
56  
57  
58  
59  
60

For peer review only

## Results

Distribution across networks in the UK and Ireland generated 5440 responses. Follow-up responses from the peak and deceleration surveys were 3896 (71.6%) and 3079 (56.6%) respectively (figure 1). The final analysis cohort was 3079 participants, consisting of 1686 (54.8%) from EM, 1114 (36.2%) from Anaesthetics and 526 (17.1%) from ICM, with some participants working across multiple specialities.

The demographic and professional characteristics of the respondent population are summarised in Table 1. The cohort was 51.0% female, with a median age group of 36-40 years, and was representative of all professional grades. Respondents were 63.7% 'White British', 6.2% 'Irish', and '30.1% 'Ethnic Minority'; a full breakdown of ethnicity is provided in the online supplementary hub (<https://github.com/wjchulme/TERN-CERA-study/tree/main/outputs>).<sup>41,42</sup>

**Table 1 Demographic and occupational characteristics of responders who completed all three study phases**

|                                  | All (N=3079) | Emergency Medicine (N=1686) | Anaesthetics (N=1114) | Intensive Care Medicine (N=526) |
|----------------------------------|--------------|-----------------------------|-----------------------|---------------------------------|
| <b>Age</b>                       |              |                             |                       |                                 |
| 20-25                            | 111 (3.6%)   | 99 (5.9%)                   | 3 (0.3%)              | 9 (1.7%)                        |
| 26-30                            | 737 (24.0%)  | 471 (28.0%)                 | 184 (16.5%)           | 130 (24.8%)                     |
| 31-35                            | 682 (22.2%)  | 366 (21.7%)                 | 242 (21.8%)           | 141 (26.9%)                     |
| 36-40                            | 497 (16.2%)  | 279 (16.6%)                 | 177 (15.9%)           | 81 (15.5%)                      |
| 41-45                            | 406 (13.2%)  | 220 (13.1%)                 | 156 (14.0%)           | 55 (10.5%)                      |
| 46-50                            | 282 (9.2%)   | 128 (7.6%)                  | 133 (12.0%)           | 55 (10.5%)                      |
| 51-55                            | 203 (6.6%)   | 72 (4.3%)                   | 121 (10.9%)           | 27 (5.2%)                       |
| 56-60                            | 107 (3.5%)   | 34 (2.0%)                   | 63 (5.7%)             | 19 (3.6%)                       |
| >60                              | 49 (1.6%)    | 14 (0.8%)                   | 33 (3.0%)             | 7 (1.3%)                        |
| Missing                          | 5            | 3                           | 2                     | 2                               |
| <b>Gender</b>                    |              |                             |                       |                                 |
| Male                             | 1455 (48.8%) | 774 (47.4%)                 | 542 (50.1%)           | 272 (53.8%)                     |
| Female                           | 1522 (51.0%) | 855 (52.4%)                 | 538 (49.7%)           | 233 (46.0%)                     |
| Other                            | 7 (0.2%)     | 4 (0.2%)                    | 2 (0.2%)              | 1 (0.2%)                        |
| Missing                          | 95           | 53                          | 32                    | 20                              |
| <b>Seniority</b>                 |              |                             |                       |                                 |
| Junior Doctor                    | 1089 (35.4%) | 692 (41.0%)                 | 276 (24.8%)           | 187 (35.6%)                     |
| Middle Grade Doctor              | 660 (21.4%)  | 357 (21.2%)                 | 230 (20.6%)           | 129 (24.5%)                     |
| Other Senior Doctor              | 228 (7.4%)   | 156 (9.3%)                  | 66 (5.9%)             | 34 (6.5%)                       |
| Senior Doctor (Consultant Grade) | 1102 (35.8%) | 481 (28.5%)                 | 542 (48.7%)           | 176 (33.5%)                     |
| <b>Geographical Region</b>       |              |                             |                       |                                 |
| East Midlands                    | 177 (5.7%)   | 78 (4.6%)                   | 84 (7.5%)             | 24 (4.6%)                       |
| East of England                  | 172 (5.6%)   | 87 (5.2%)                   | 70 (6.3%)             | 29 (5.5%)                       |
| London                           | 454 (14.7%)  | 319 (18.9%)                 | 103 (9.2%)            | 42 (8.0%)                       |
| North East                       | 132 (4.3%)   | 68 (4.0%)                   | 47 (4.2%)             | 30 (5.7%)                       |
| North West                       | 334 (10.8%)  | 149 (8.8%)                  | 141 (12.7%)           | 78 (14.8%)                      |
| South East                       | 355 (11.5%)  | 229 (13.6%)                 | 105 (9.4%)            | 48 (9.1%)                       |
| South West                       | 430 (14.0%)  | 208 (12.3%)                 | 167 (15.0%)           | 76 (14.4%)                      |
| West Midlands                    | 183 (5.9%)   | 89 (5.3%)                   | 78 (7.0%)             | 44 (8.4%)                       |
| Yorkshire and the Humber         | 212 (6.9%)   | 90 (5.3%)                   | 102 (9.2%)            | 55 (10.5%)                      |
| Northern Ireland                 | 87 (2.8%)    | 41 (2.4%)                   | 34 (3.1%)             | 20 (3.8%)                       |
| Scotland                         | 253 (8.2%)   | 159 (9.4%)                  | 80 (7.2%)             | 32 (6.1%)                       |

|                     |              |              |             |             |
|---------------------|--------------|--------------|-------------|-------------|
| Wales               | 92 (3.0%)    | 21 (1.2%)    | 62 (5.6%)   | 21 (4.0%)   |
| Dublin              | 111 (3.6%)   | 82 (4.9%)    | 21 (1.9%)   | 16 (3.0%)   |
| Rest of Ireland     | 87 (2.8%)    | 66 (3.9%)    | 20 (1.8%)   | 11 (2.1%)   |
| <b>Nation</b>       |              |              |             |             |
| England             | 2449 (79.5%) | 1317 (78.1%) | 897 (80.5%) | 426 (81.0%) |
| Northern Ireland    | 87 (2.8%)    | 41 (2.4%)    | 34 (3.1%)   | 20 (3.8%)   |
| Republic of Ireland | 198 (6.4%)   | 148 (8.8%)   | 41 (3.7%)   | 27 (5.1%)   |
| Scotland            | 253 (8.2%)   | 159 (9.4%)   | 80 (7.2%)   | 32 (6.1%)   |
| Wales               | 92 (3.0%)    | 21 (1.2%)    | 62 (5.6%)   | 21 (4.0%)   |
| <b>Ethnicity</b>    |              |              |             |             |
| White British       | 1888 (63.7%) | 949 (58.4%)  | 755 (70.3%) | 338 (67.1%) |
| Irish               | 185 (6.2%)   | 118 (7.3%)   | 51 (4.7%)   | 33 (6.5%)   |
| Ethnic minority     | 893 (30.1%)  | 557 (34.3%)  | 268 (25.0%) | 133 (26.4%) |
| Missing             | 113          | 62           | 40          | 22          |
| <b>Redeployed</b>   |              |              |             |             |
| Yes                 | 249 (8.1%)   | 47 (2.8%)    | 196 (17.6%) | 20 (3.8%)   |
| No                  | 2824 (91.9%) | 1636 (97.2%) | 916 (82.4%) | 504 (96.2%) |
| Missing             | 6            | 3            | 2           | 2           |

## Primary Outcomes

### General Health Questionnaire-12

The prevalence of psychological distress, as defined by scores >3 on the GHQ-12 0-0-1-1 scoring method, was 44.7% (n=1334) in the acceleration survey, 36.9% (n=1098) at peak and 31.5% (n=918) during the deceleration phase. Median GHQ-12 scores were 13.0 (Q1-Q3, 10.0-17.0), 13.0 (Q1-Q3, 9.0-16.0) and 12.0 (Q1-Q3, 9.0-16.0) respectively (figure 2), and mean scores were 13.7, 13.2 and 12.9 across the acceleration, peak and deceleration surveys. Median distress scores were higher in the Anaesthetic and ICM cohorts at the acceleration phase when compared to EM, but these decreased in all three groups throughout the first pandemic wave.

### Impact of Events Scale-Revised

The prevalence of psychological trauma, as defined by a score of >24 on the IES-R, was 23.7% (n=647) at peak and 17.7% (n=484) at deceleration. The prevalence of 'probable PTSD', as defined by a score of >33 was 12.6% (n=343) at peak and 10.1% (n=276) at deceleration. During the peak phase, prevalence of trauma (>24) was 24.9% (n=378) in EM, 21.5% (n=204) in anaesthetics and 24.9% (n=117) in ICM. Prevalence of 'probable PTSD' (>33) was higher in EM (13.9%, n=211) and ICM (13.6%, n= 64) when compared to Anaesthetics (10.8%, n=103). During the deceleration phase, prevalence of trauma (>24) decreased to 19.7% (n=93) in ICM and 18.7% (n=285) in EM. 'Probable PTSD' (>33) decreased to 11.1% (n=169) in EM, compared to 10.8% (n=51) in ICM and 8.8% (n=85) in Anaesthetics. The median IES-R was highest in the peak survey at 13 (Q1-Q3, 5-24), and 9 (Q1-Q3, 2-19) in the deceleration survey (see table 2 and figure 3).

**Table 2. GHQ-12 and IES-R Scores for participants who responded to all 3 survey phases**

|              | All (N=3079) | Emergency Medicine (N=1686) | Anaesthetics (N=1114) | Intensive Care Medicine (N=526) |
|--------------|--------------|-----------------------------|-----------------------|---------------------------------|
| Acceleration |              |                             |                       |                                 |

|                             |                   |                   |                   |                   |
|-----------------------------|-------------------|-------------------|-------------------|-------------------|
| <b>GHQ-12 (0123 score)</b>  |                   |                   |                   |                   |
| Mean                        | 13.7              | 13.3              | 14.4              | 14.0              |
| Median (Q1, Q3)             | 13.0 (10.0, 17.0) | 13.0 (10.0, 16.0) | 14.0 (11.0, 18.0) | 14.0 (10.2, 17.0) |
| <b>GHQ-12 (0011 &gt; 3)</b> |                   |                   |                   |                   |
| > 3                         | 1334 (44.7%)      | 667 (40.7%)       | 542 (50.2%)       | 253 (49.6%)       |
| N-Missing                   | 92                | 48                | 34                | 16                |
| <b>Peak</b>                 |                   |                   |                   |                   |
| <b>GHQ-12 (0123 score)</b>  |                   |                   |                   |                   |
| Mean                        | 13.2              | 12.8              | 13.6              | 13.6              |
| Median (Q1, Q3)             | 13.0 (9.0, 16.0)  | 12.0 (9.0, 16.0)  | 13.0 (10.0, 17.0) | 13.0 (10.0, 17.0) |
| <b>GHQ-12 (0011 &gt; 3)</b> |                   |                   |                   |                   |
| > 3                         | 1098 (36.9%)      | 543 (33.3%)       | 454 (42.3%)       | 211 (41.1%)       |
| N-Missing                   | 105               | 56                | 40                | 13                |
| <b>IES-R score</b>          |                   |                   |                   |                   |
| Mean                        | 16.3              | 16.7              | 15.8              | 17.2              |
| Median (Q1, Q3)             | 13.0 (5.0, 24.0)  | 13.0 (5.0, 24.0)  | 13.0 (6.0, 23.0)  | 14.0 (6.0, 24.0)  |
| <b>IES-R &gt; 24</b>        |                   |                   |                   |                   |
| IES-R-0123 > 24             | 647 (23.7%)       | 378 (24.9%)       | 204 (21.5%)       | 117 (24.9%)       |
| <b>IES-R &gt; 33</b>        |                   |                   |                   |                   |
| IES-R-0123 > 33             | 343 (12.6%)       | 211 (13.9%)       | 103 (10.8%)       | 64 (13.6%)        |
| N-Missing                   | 349               | 165               | 163               | 57                |
| <b>Deceleration</b>         |                   |                   |                   |                   |
| <b>GHQ-12 (0123 score)</b>  |                   |                   |                   |                   |
| Mean                        | 12.9              | 12.8              | 13.0              | 13.1              |
| Median (Q1, Q3)             | 12.0 (9.0, 16.0)  | 12.0 (9.0, 16.0)  | 12.0 (9.0, 16.0)  | 12.0 (9.0, 17.0)  |
| <b>GHQ-12 (0011 &gt; 3)</b> |                   |                   |                   |                   |
| > 3                         | 918 (31.5%)       | 486 (30.2%)       | 340 (32.6%)       | 172 (34.6%)       |
| N-Missing                   | 165               | 78                | 71                | 29                |
| <b>IES-R score</b>          |                   |                   |                   |                   |
| Mean                        | 13.2              | 13.6              | 12.6              | 14.2              |
| Median (Q1, Q3)             | 9.0 (2.0, 19.0)   | 9.0 (2.0, 20.0)   | 8.0 (2.0, 18.0)   | 9.0 (3.0, 20.0)   |
| <b>IES-R &gt; 24</b>        |                   |                   |                   |                   |
| IES-R-0123 > 24             | 484 (17.7%)       | 285 (18.7%)       | 159 (16.5%)       | 93 (19.7%)        |
| <b>IES-R &gt; 33</b>        |                   |                   |                   |                   |
| IES-R-0123 > 33             | 276 (10.1%)       | 169 (11.1%)       | 85 (8.8%)         | 51 (10.8%)        |
| N-Missing                   | 344               | 164               | 153               | 53                |

## Secondary Outcomes

### Risk Factors for Psychological Distress (GHQ-12) and Trauma (IES-R)

The overall strength of the relationship between participant factors and the two outcome measures, psychological distress and trauma, is summarised using Nagakawa's marginal  $R^2$  (figures 4+5). The form of these univariable relationships is described graphically for the five variables with the highest  $R^2$  values in figures 6 a-f. Graphs for the remaining variables are reported in online supplementary hub (<https://github.com/wjchulme/TERN-CERA-study/tree/main/outputs>).

### Personal and Professional variables predicting distress (GHQ-12)

Worry of infecting family members due to clinical work ( $R^2 = 0.06$ ) and worry of personal infection ( $R^2 = 0.05$ ) were the two variables most strongly associated with distress. Figures 6a and 6b report the mean

1  
2  
3 GHQ-12-score for the levels within this variable. Those that were 'extremely worried' about infecting  
4 family had a mean GHQ-12-modelled score of 15.3 (95% CI, 15.0, 15.6), 15.1 (95% CI, 14.8, 15.5) and  
5 14.6 (95% CI, 14.3, 15.0) during the acceleration, peak and deceleration respectively, compared with  
6 mean scores of 13.7, 13.2 and 12.9 respectively for all participants. For those who were 'extremely  
7 worried' about personal infection, the mean GHQ-12 modelled score was 16.6 (95% CI, 16.1, 17.1)  
8 during the acceleration period, compared with 10.9 (95% CI, 9.7, 12.1) for those who were 'not worried  
9 at all' about being infected. For the mean GHQ-12 modelled score for each of the other variables see  
10 the online link for the figures and values ([https://github.com/wjchulme/TERN-CERA-](https://github.com/wjchulme/TERN-CERA-study/tree/main/outputs)  
11 [study/tree/main/outputs](https://github.com/wjchulme/TERN-CERA-study/tree/main/outputs)).

### 17 **Personal and Professional variables predicting trauma (IES-R)**

19 For trauma, worry of infection of family members due to clinical role had the highest  $R^2$  value ( $R^2=0.10$ ).  
20 Mean IES-R modelled score for those who were 'extremely worried' about infecting family was 23.0  
21 (95% CI, 22.2, 23.8) during the peak compared to 10.0 (95% CI, 7.8, 12.2) for those who were 'not  
22 worried at all' during the peak (Fig 6c). This is significantly higher than the reported mean IES-R overall  
23 of 16.3.

27 Concern that COVID-19 would exacerbate symptoms of an established mental health condition ( $R^2 =$   
28  $0.06$ ) had the second highest  $R^2$  value. Peak IES-R mean modelled scores were 23.3 (95% CI, 22.1,  
29 24.4) in those who agreed with this statement compared to 15.2 (95% CI, 14.7, 15.7) in those who  
30 disagreed. Deceleration mean IES-R modelled scores remained high for those who agreed, 22.3 (95%  
31 CI, 21.1, 23.6). (Figure 6d)

36 Worry relating to personal infection due to clinical role ( $R^2 = 0.06$ ) was again strongly associated with  
37 trauma. Figure 6e displays the mean IES-R modelled scores and demonstrates the peak (24.0 (95%  
38 CI, 22.5, 25.4)) and deceleration (20.3 (95% CI, 18.7, 21.8)) outcomes in participants who were  
39 'extremely worried' compared to those who were 'not worried at all' during the peak (11.3 (95% CI 8.6,  
40 14.0)) and deceleration (10.0 (95% CI 8.0, 12.0)).

45 Whilst ethnicity was not strongly associated with distress, it was a stronger predictor of trauma ( $R^2 =$   
46  $0.03$ ). Mean modelled trauma scores for 'Ethnic Minority' participants at peak was 18.8 (95% CI, 17.8,  
47 19.8), compared to 'White British' participants of 15.1 (95% CI, 14.5, 15.8). (Figure 6f) For the mean  
48 IES-R modelled scores for each of the other variables see online link for the figures and values.  
49 (<https://github.com/wjchulme/TERN-CERA-study/tree/main/outputs>)

### 53 **Incidence of self-reported COVID-19 infection and isolation**

55 By the deceleration phase of the pandemic 6.9% ( $n=212$ ) of respondents had received a positive  
56 diagnosis of COVID-19 and 0.4% ( $n=12$ ) had been admitted to hospital. A positive diagnosis did not  
57 have a significant effect in prediction of trauma ( $R^2=0.014$ ).

### Regional and national variation of psychological distress and trauma

The region in which participants worked was more valuable for predicting trauma ( $R^2 = 0.034$ ), than for distress ( $R^2 = 0.016$ ). The mean modelled score of the different regions within the UK and Republic of Ireland on IES-R is demonstrated in figure 7.

### Drop-out by GHQ-12 and IES-R

Response rate for the peak and deceleration surveys was 71.6% and 56.6% respectively. There was no significant difference in either the GHQ-12 or IES-R scores between those who dropped out and those who remained in the study (see online supplement).

### Discussion

In this prospective longitudinal survey of 3079 frontline doctors, the prevalence of psychological distress reached 44.7% during the acceleration phase, and reached 23.7% for trauma during the peak phase - these figures were substantially higher than for the general population.<sup>43</sup> For psychological distress, rates declined through peak and deceleration phases of the first wave to a level comparable to pre-pandemic levels.<sup>44</sup> Prevalence of 'probable PTSD' was 12.6% at peak and 10.1% at deceleration, demonstrating a degree of natural recovery.<sup>45,46</sup> However, just less than a quarter experienced sub-threshold post-trauma symptoms 30 days following the pandemic peak.

Personal factors were the most powerful predictors of both psychological distress and trauma. The most significant predictors relate to familial safety, personal safety, and established mental health conditions. These findings support aggregated data in recent reviews and meta-analyses on the key predictors of psychological distress in disaster or infectious outbreak settings.<sup>1,7,21-23</sup> However, it cannot be ignored that the psychological harm associated with both familial and personal safety may potentially be explained by the perceived (and reported) inadequate provision of PPE to frontline workers.<sup>47,48</sup> This is an area where improvements must be made in order to mitigate against future physical and psychological harms that novel pathogens present.

While most findings are consistent with existing research, our study also identifies ethnicity as a novel, key predictor of trauma.<sup>49-51</sup> This is unsurprising given higher rates of reported mortality in ethnic minority groups with this particular pandemic.<sup>52</sup> However the nature and direction of relationship between these risk factors and poorer outcomes is undoubtedly complex. Ongoing work continues to seek further understanding in this area.<sup>53</sup>

Rates of trauma were high across all three specialty groups. One in four doctors met the clinical threshold, with the highest rates seen in EM and ICM. This is likely explained by their clinical roles during the pandemic, in which they were exposed to a higher volume of COVID-19 positive patients compared to Anaesthetic colleagues. However, it is important to note that the rate of trauma seen in Anaesthetics was also of concern. At the deceleration phase, EM doctors had higher rates of 'probable PTSD' (IES-R >33), whereas ICM doctors had a higher prevalence of trauma (IES-R >24). This may



1  
2  
3 reflect the later peak in ICUs when compared to EM<sup>54</sup> or the potential impact of downstream mortality.  
4 Further work should explore longer term outcomes in all cohorts.  
5  
6

7  
8 It is evident from our longitudinal data that vulnerability to poorer psychological outcomes may be  
9 predicted by certain characteristics and therefore potentially mitigated through targeted intervention.  
10 Studies examining psychiatric outcomes in SARS reflect that psychological distress is likely to persist.  
11 Identification of those likely to experience adversity, and interventions to mitigate these, must begin  
12 now.<sup>8,10,55,56</sup> Without appropriate support and intervention doctors are likely to experience long-term  
13 effects on mental health, resulting in increased sickness rates, absenteeism, impaired performance at  
14 work, and the development of physical health problems.<sup>8,10,12,57,58</sup> Therefore the early identification of  
15 ongoing psychological distress will be pivotal in influencing the longer-term mental health of frontline  
16 workers. Based on research from COVID-19 and other pandemics, we can be certain that rates and  
17 severity of distress will rise following this second wave of the pandemic. We now know that doctors are  
18 working on the frontline while carrying the heavy burden of fear of infecting themselves, or critically,  
19 family members, while some continue to battle high levels of psychological distress. This distress was  
20 evident in the lead up to the first peak, but sustained well beyond this time point. Doctors are continuing  
21 to work in very highly pressured, high risk environments with a significant proportion doing so despite  
22 clinical levels of distress. Policymakers and professional bodies should urgently seek to develop an  
23 overarching 'best practice' pathway to support all healthcare staff in these environments.  
24  
25  
26  
27  
28  
29  
30  
31

32 While various interventions are recommended specifically for frontline workers there is common  
33 agreement in the necessity for basic psychosocial interventions (i.e. sleep hygiene, exercise, health  
34 behaviour) to facilitate return to equilibrium<sup>59-62</sup>, yet these measures are not always sufficient to  
35 ameliorate persistent distress. It is crucial that an overarching 'best practice' pathway and package of  
36 care is implemented to help support staff now and for the future. This must be evidence-based,  
37 multilevel, starting with the 'individual' level and moving through to 'organisational' level intervention,  
38 including (a) mobilisation of formal peer & organisational support structures, (b) mechanisms for  
39 recognising and monitoring distress, and (c) offer clear referral pathways to evidence-based  
40 interventions. Access to appropriate psychological support is imperative; cognitive behavioural therapy  
41 is recommended by the National Institute for health and Care Excellence (NICE) to ameliorate anxiety,  
42 depression and PTSD<sup>63,64</sup> however further work is needed to ensure these interventions this are  
43 suitably tailored to the practicalities of shift work and the unique experiences faced by frontline  
44 clinicians. With this, there is a responsibility to ensure equality in the provision of care and pathways  
45 to access, for this is likely to be necessary for many.  
46  
47  
48  
49  
50  
51  
52  
53

### 54 **Strengths and Weaknesses**

55 This is a large-scale longitudinal study examining prevalence of psychological distress in doctors in the  
56 UK and Ireland, offering a robust and reliable measure of the impact of COVID-19 on the mental health  
57 of frontline doctors, and allows comparison with other pandemic mental health trajectories. Due to the  
58 three-phase prospective design and extent of data collected, findings from this study can be reliably  
59  
60

1  
2  
3 used to inform the development of preparations and interventions to mitigate the impact of COVID-19  
4 and future infectious disease outbreaks on mental health in frontline doctors.  
5  
6

7 However, there are limitations that may influence our findings. The reported rates of distress and trauma  
8 do not take account of any pre-existing psychiatric morbidity or historical factors that may predispose  
9 doctors to developing mental health difficulties in these circumstances.<sup>40,65–67</sup> Data was gathered with  
10 regards to historical trauma, one of the most significant predictors of mental health difficulties long-term.  
11 Furthermore, whilst the sample size is large, any self-reporting measure is open to selection bias. This  
12 may have resulted in a biased sample with particularly high or low levels of distress and trauma.  
13 However, in the follow-up surveys (peak and deceleration) there was no difference in acceleration  
14 distress or trauma scores between those who dropped out and those who continued; yet we are unable  
15 to comment on those who declined to participate. Whilst the two primary outcome measures, GHQ-12  
16 and IES-R, have good psychometric properties, there is a concern that survey data may overstate the  
17 prevalence of cases when compared to formal diagnostic interviews such as the SCID (The Structured  
18 Clinical **Interview** for DSM-IV Axis I Disorders ); this is difficult to implement in such large samples, thus  
19 we cautiously avoid inference of definite diagnosis.  
20  
21  
22  
23  
24  
25  
26

27 While the protocol was closely adhered to, variation in regional peaks may have influenced accurate  
28 capturing of psychological distress and trauma rates. It is noted that whilst the acceleration phase is  
29 study 'baseline', as the pandemic was present and proliferating in the UK at the acceleration phase, it  
30 more accurately represents the initial stress associated with a rapidly spreading highly infectious virus  
31 of unknown pathogenic origins and no effective treatment; a reasonable response to the context. Future  
32 research should continue to follow frontline doctors through the pandemic and beyond, to assess  
33 whether the mental health trajectories are similar to other infectious disease pandemics.  
34  
35  
36  
37  
38

### 39 **Conclusion**

40 Our findings reflect a pattern of elevated distress during the acceleration and peak phase of the  
41 current pandemic, some degree of natural recovery and a significant minority continuing to experience  
42 residual ongoing distress. It is essential that policymakers and professional bodies seek to prevent  
43 future adverse effects through provision of vital equipment to mitigate both physical and psychological  
44 harm and the development of clear pathways to effective psychological care. Moving forward, it is  
45 essential the COVID-19 pandemic serves as a foundation for significant development and growth in  
46 all of these areas and that there is ongoing assessment of the psychological health of healthcare  
47 workers both during the pandemic and beyond.  
48  
49  
50  
51  
52

### 53 **References**

- 54  
55 1 Brooks SK, Dunn R, Sage CAM, Amlôt R, Greenberg N, Rubin GJ. Risk and resilience factors  
56 affecting the psychological wellbeing of individuals deployed in humanitarian relief roles after a  
57 disaster. *J. Ment. Heal.* 2015. DOI:10.3109/09638237.2015.1057334.  
58  
59 2 Liu Q, Luo D, Haase JE, *et al.* The experiences of health-care providers during the COVID-19  
60

- 1  
2  
3 crisis in China: a qualitative study. *Lancet Glob Heal* 2020. DOI:10.1016/S2214-  
4 109X(20)30204-7.  
5  
6 3 McCabe R, Schmit N, Christen P, *et al*. Adapting hospital capacity to meet changing demands  
7 during the COVID-19 pandemic. *BMC Med* 2020. DOI:10.1186/s12916-020-01781-w.  
8  
9 4 Phua J, Weng L, Ling L, *et al*. Intensive care management of coronavirus disease 2019  
10 (COVID-19): challenges and recommendations. *Lancet Respir. Med.* 2020.  
11 DOI:10.1016/S2213-2600(20)30161-2.  
12  
13 5 Kursumovic E, Lennane S, Cook TM. Deaths in healthcare workers due to COVID-19: the  
14 need for robust data and analysis. *Anaesthesia* 2020; **75**: 989–92.  
15  
16 6 Maunder RG, Lancee WJ, Rourke S, *et al*. Factors associated with the psychological impact of  
17 severe acute respiratory syndrome on nurses and other hospital workers in Toronto.  
18 *Psychosom. Med.* 2004. DOI:10.1097/01.psy.0000145673.84698.18.  
19  
20 7 Kisely S, Warren N, McMahon L, Dalais C, Henry I, Siskind D. Occurrence, prevention, and  
21 management of the psychological effects of emerging virus outbreaks on healthcare workers:  
22 rapid review and meta-analysis. *BMJ* 2020. DOI:10.1136/bmj.m1642.  
23  
24 8 Allan SM, Bealey R, Birch J, *et al*. The prevalence of common and stress-related mental health  
25 disorders in healthcare workers based in pandemic-affected hospitals: a rapid systematic  
26 review and meta-analysis. 2020 DOI:10.1101/2020.05.04.20089862.  
27  
28 9 Roberts T, Daniels J, Hulme W, *et al*. Psychological distress during the acceleration phase of  
29 the COVID-19 pandemic: A survey of doctors practising in emergency medicine, anaesthesia  
30 and intensive care medicine in the UK and Ireland. *Emerg Med J* 2021; **0**: 1–10.  
31  
32 10 Maunder RG, Lancee WJ, Balderson KE, *et al*. Long-term psychological and occupational  
33 effects of providing hospital healthcare during SARS outbreak. *Emerg Infect Dis* 2006.  
34 DOI:10.3201/eid1212.060584.  
35  
36 11 Fiksenbaum L, Marjanovic Z, Greenglass ER, Coffey S. Emotional exhaustion and state anger  
37 in nurses who worked during the sars outbreak: The role of perceived threat and  
38 organizational support. *Can J Community Ment Heal* 2006. DOI:10.7870/cjcmh-2006-0015.  
39  
40 12 Arora M, Asha S, Chinnappa J, Diwan AD. Review article: Burnout in emergency medicine  
41 physicians. *EMA - Emerg. Med. Australas.* 2013; **25**: 491–5.  
42  
43 13 Lai J, Ma S, Wang Y, *et al*. Factors Associated With Mental Health Outcomes Among Health  
44 Care Workers Exposed to Coronavirus Disease 2019. *JAMA Netw open* 2020; **3**: e203976.  
45  
46 14 Di Tella M, Romeo A, Benfante A, Castelli L. Mental health of healthcare workers during the  
47 <scp>COVID</scp> -19 pandemic in Italy. *J Eval Clin Pract* 2020; **26**: 1583–7.  
48  
49 15 Pappa S, Ntella V, Giannakas T, Giannakoulis VG, Papoutsis E, Katsaounou P. Prevalence of  
50 depression, anxiety, and insomnia among healthcare workers during the COVID-19 pandemic:  
51 A systematic review and meta-analysis. *Brain Behav Immun* 2020.  
52 DOI:10.1016/j.bbi.2020.05.026.  
53  
54 16 Benfante A, Di Tella M, Romeo A, Castelli L. Traumatic Stress in Healthcare Workers During  
55 COVID-19 Pandemic: A Review of the Immediate Impact. *Front Psychol* 2020; **11**: 569935.  
56  
57 17 Clap for Carers: UK in “emotional” tribute to NHS and care workers - BBC News.  
58  
59  
60

- 1  
2  
3 <https://www.bbc.co.uk/news/uk-52058013> (accessed Nov 20, 2020).
- 4  
5 18 The Lancet. COVID-19: protecting health-care workers. *Lancet*. 2020. DOI:10.1016/S0140-  
6 6736(20)30644-9.
- 7  
8 19 Coronavirus: Mental health of NHS staff at long-term risk - BBC News.  
9 <https://www.bbc.co.uk/news/health-52528619> (accessed Nov 20, 2020).
- 10  
11 20 Halpern J, Maunder RG, Schwartz B, Gurevich M. Identifying risk of emotional sequelae after  
12 critical incidents. *Emerg Med J* 2011. DOI:10.1136/emj.2009.082982.
- 13  
14 21 Brooks SK, Dunn R, Amlôt R, Rubin GJ, Greenberg N. A Systematic, Thematic Review of  
15 Social and Occupational Factors Associated with Psychological Outcomes in Healthcare  
16 Employees during an Infectious Disease Outbreak. *J Occup Environ Med* 2018.  
17 DOI:10.1097/JOM.0000000000001235.
- 18  
19 22 Lancee WJ, Maunder RG, Goldbloom DS. Prevalence of psychiatric disorders among Toronto  
20 hospital workers one to two years after the SARS outbreak. *Psychiatr Serv* 2008.  
21 DOI:10.1176/ps.2008.59.1.91.
- 22  
23 23 Ozer EJ, Best SR, Lipsey TL, Weiss DS. Predictors of posttraumatic stress disorder and  
24 symptoms in adults: A meta-analysis. *Psychol. Bull.* 2003; **129**: 52–73.
- 25  
26 24 Roberts T, Daniels J, Hulme W, *et al.* COVID-19 emergency response assessment study: a  
27 prospective longitudinal survey of frontline doctors in the UK and Ireland: study protocol. *BMJ*  
28 *Open* 2020. DOI:10.1136/bmjopen-2020-039851.
- 29  
30 25 Eysenbach G. Improving the Quality of Web Surveys: The Checklist for Reporting Results of  
31 Internet E-Surveys (CHERRIES). *J Med Internet Res* 2004; **6**: e34.
- 32  
33 26 Harris PA, Taylor R, Minor BL, *et al.* The REDCap consortium: Building an international  
34 community of software platform partners. *J Biomed Inform* 2019; **95**: 103208.
- 35  
36 27 Harris PA, Taylor R, Thielke R, Payne J, Gonzalez N, Conde JG. Research electronic data  
37 capture (REDCap)—A metadata-driven methodology and workflow process for providing  
38 translational research informatics support. *J Biomed Inform* 2009; **42**: 377–81.
- 39  
40 28 Holloway R, Rasmussen SA, Zaza S, Cox N, Jernigan D. Updated Preparedness and  
41 Response Framework for Influenza Pandemics. 2014.  
42 <https://www.cdc.gov/mmwr/preview/mmwrhtml/rr6306a1.htm> (accessed April 8, 2020).
- 43  
44 29 Goldberg D, Williams P. A user's guide to the General Health Questionnaire. London: GL  
45 Assessment, 1988.
- 46  
47 30 Goldberg DP, Gater R, Sartorius N, *et al.* The validity of two versions of the GHQ in the WHO  
48 study of mental illness in general health care. *Psychol Med* 1997.  
49 DOI:10.1017/S0033291796004242.
- 50  
51 31 Goldberg DP, Oldehinkel T, Ormel J. Why GHQ threshold varies from one place to another.  
52 *Psychol Med* 1998. DOI:10.1017/S0033291798006874.
- 53  
54 32 Christianson S, Marren J. The Impact of Event Scale - Revised (IES-R). *Medsurg Nurs* 2012.
- 55  
56 33 Asukai N, Kato H, Kawamura N, *et al.* Reliability and validity of the Japanese-language version  
57 of the Impact of Event Scale-Revised (IES-R-J): Four studies of different traumatic events. *J*  
58 *Nerv Ment Dis* 2002. DOI:10.1097/00005053-200203000-00006.
- 59  
60

- 1  
2  
3 34 Creamer M, Bell R, Failla S. Psychometric properties of the Impact of Event Scale - Revised. *Behav Res Ther* 2003. DOI:10.1016/j.brat.2003.07.010.  
4  
5  
6 35 Nakagawa S, Johnson PCD, Schielzeth H. The coefficient of determination R<sup>2</sup> and intra-class correlation coefficient from generalized linear mixed-effects models revisited and expanded. *J R Soc Interface* 2017. DOI:10.1098/rsif.2017.0213.  
7  
8  
9  
10 36 Wickham H, Averick M, Bryan J, *et al*. Welcome to the Tidyverse. *J Open Source Softw* 2019;  
11 4: 1686.  
12  
13 37 Bates D, Mächler M, Bolker BM, Walker SC. Fitting linear mixed-effects models using lme4. *J Stat Softw* 2015. DOI:10.18637/jss.v067.i01.  
14  
15  
16 38 Lüdtke D. ggeffects: Tidy Data Frames of Marginal Effects from Regression Models. *J Open Source Softw* 2018; 3: 772.  
17  
18  
19 39 Smith J, Keating L, Flowerdew L, *et al*. An Emergency Medicine Research Priority Setting Partnership to establish the top 10 research priorities in emergency medicine. *Emerg Med J*  
20 2017. DOI:10.1136/emermed-2017-206702.  
21  
22  
23 40 Cottey L, Roberts T, Graham B, *et al*. Need for recovery amongst emergency physicians in the  
24 UK and Ireland: a cross-sectional survey. *BMJ Open* 2020.  
25  
26 41 Khunti K, Routen A, Pareek M, Treweek S, Platt L. The language of ethnicity. *BMJ* 2020; 371:  
27 m4493.  
28  
29 42 Bunglawala Z (Race DU, Office) C. Please, don't call me BAME or BME! 2019.  
30 <https://civildservice.blog.gov.uk/2019/07/08/please-dont-call-me-bame-or-bme/> (accessed Oct  
31 12, 2020).  
32  
33 43 Rettie H, Daniels J. Coping and Tolerance of Uncertainty: Predictors and Mediators of Mental  
34 Health During the COVID-19 Pandemic. *Am Psychol* 2020. DOI:10.1037/amp0000710.  
35  
36 44 Kinman G, Teoh K. What could make a difference to the mental health of UK doctors? A  
37 review of the research evidence. 2018.  
38  
39 45 Morina N, Wicherts JM, Lobbrecht J, Priebe S. Remission from post-traumatic stress disorder  
40 in adults: A systematic review and meta-analysis of long term outcome studies. *Clin. Psychol.*  
41 *Rev.* 2014. DOI:10.1016/j.cpr.2014.03.002.  
42  
43 46 Kessler RC, Sonnega A, Bromet E, Hughes M, Nelson CB. Posttraumatic Stress Disorder in  
44 the National Comorbidity Survey. *Arch Gen Psychiatry* 1995.  
45 DOI:10.1001/archpsyc.1995.03950240066012.  
46  
47 47 McKee M. England's PPE procurement failures must never happen again. *BMJ*. 2020.  
48 DOI:10.1136/bmj.m2858.  
49  
50 48 Godlee F. Covid-19: weathering the storm. *BMJ* 2020; 368: m1199.  
51  
52 49 Chew NWS, Lee GKH, Tan BYQ, *et al*. A multinational, multicentre study on the psychological  
53 outcomes and associated physical symptoms amongst healthcare workers during COVID-19  
54 outbreak. *Brain Behav Immun* 2020. DOI:10.1016/j.bbi.2020.04.049.  
55  
56 50 Berger W, Coutinho ESF, Figueira I, *et al*. Rescuers at risk: A systematic review and meta-  
57 regression analysis of the worldwide current prevalence and correlates of PTSD in rescue  
58 workers. *Soc. Psychiatry Psychiatr. Epidemiol.* 2012. DOI:10.1007/s00127-011-0408-2.  
59  
60

- 1  
2  
3 51 Perrin MA, DiGande L, Wheeler K, Thorpe L, Farfel M, Brackbill R. Differences in PTSD  
4 prevalence and associated risk factors among World Trade Center disaster rescue and  
5 recovery workers. *Am J Psychiatry* 2007. DOI:10.1176/appi.ajp.2007.06101645.  
6  
7 52 Coronavirus (COVID-19) related deaths by ethnic group, England and Wales - Office for  
8 National Statistics.  
9  
10 [https://www.ons.gov.uk/peoplepopulationandcommunity/birthsdeathsandmarriages/deaths/arti](https://www.ons.gov.uk/peoplepopulationandcommunity/birthsdeathsandmarriages/deaths/articles/coronavirusrelateddeathsbyethnicgroupenglandandwales/2march2020to10april2020)  
11 [cles/coronavirusrelateddeathsbyethnicgroupenglandandwales/2march2020to10april2020](https://www.ons.gov.uk/peoplepopulationandcommunity/birthsdeathsandmarriages/deaths/articles/coronavirusrelateddeathsbyethnicgroupenglandandwales/2march2020to10april2020)  
12 (accessed Nov 20, 2020).  
13  
14 53 Iacobucci G. Covid-19: Increased risk among ethnic minorities is largely due to poverty and  
15 social disparities, review finds. *BMJ* 2020; **371**. DOI:10.1136/bmj.m4099.  
16  
17 54 Doidge JC, Mouncey PR, Thomas K, *et al*. Trends in Intensive Care for Patients with COVID-  
18 19 in England, Wales and Northern Ireland. 2020; published online Aug 11.  
19 DOI:10.20944/preprints202008.0267.v1.  
20  
21 55 Mak IWC, Chu CM, Pan PC, Yiu MGC, Chan VL. Long-term psychiatric morbidities among  
22 SARS survivors. *Gen Hosp Psychiatry* 2009. DOI:10.1016/j.genhosppsy.2009.03.001.  
23  
24 56 Lee AM, Wong JGWS, McAlonan GM, *et al*. Stress and psychological distress among SARS  
25 survivors 1 year after the outbreak. *Can J Psychiatry* 2007.  
26 DOI:10.1177/070674370705200405.  
27  
28 57 McAlonan GM, Lee AM, Cheung V, *et al*. Immediate and sustained psychological impact of an  
29 emerging infectious disease outbreak on health care workers. *Can J Psychiatry* 2007.  
30 DOI:10.1177/070674370705200406.  
31  
32 58 Stuijtzand S, Deforges C, Sandoz V, *et al*. Psychological impact of an epidemic/pandemic on  
33 the mental health of healthcare professionals: A rapid review. *BMC Public Health* 2020; **20**:  
34 1230.  
35  
36 59 Greenberg N, Docherty M, Gnanapragasam S, Wessely S. Managing mental health  
37 challenges faced by healthcare workers during covid-19 pandemic. *BMJ*. 2020.  
38 DOI:10.1136/bmj.m1211.  
39  
40 60 Que J, Shi L, Deng J, *et al*. Psychological impact of the covid-19 pandemic on healthcare  
41 workers: A cross-sectional study in China. *Gen Psychiatry* 2020. DOI:10.1136/gpsych-2020-  
42 100259.  
43  
44 61 Maben J, Bridges J. Covid-19: Supporting nurses' psychological and mental health. *J. Clin.*  
45 *Nurs*. 2020. DOI:10.1111/jocn.15307.  
46  
47 62 Heath C, Sommerfield A, von Ungern-Sternberg BS. Resilience strategies to manage  
48 psychological distress among healthcare workers during the COVID-19 pandemic: a narrative  
49 review. *Anaesthesia*. 2020. DOI:10.1111/anae.15180.  
50  
51 63 Post-traumatic stress disorder NICE guideline. 2018 [www.nice.org.uk/guidance/ng116](http://www.nice.org.uk/guidance/ng116)  
52 (accessed Nov 23, 2020).  
53  
54 64 Kendrick T, Pilling S. Common mental health disorders - Identification and pathways to care:  
55 NICE clinical guideline. *Br. J. Gen. Pract.* 2012; **62**: 47–9.  
56  
57 65 Graham B, Cottey L, Smith J, Mills M, Latour J. Measuring 'Need for Recovery' as an indicator  
58  
59  
60

- 1  
2  
3 of staff wellbeing in the Emergency Department—a survey study. *Emerg Med J* 2020.
- 4 66 Basu S, Qayyum H, Mason S. Occupational stress in the ED: A systematic literature review.  
5 *Emerg Med J* 2017; **34**: 441–7.
- 6 67 Schneider A, Weigl M. Associations between psychosocial work factors and provider mental  
7 well-being in emergency departments: A systematic review. *PLoS One*. 2018; **13**.  
8 DOI:10.1371/journal.pone.0197375.  
9  
10  
11  
12

### 13 Acknowledgements

14 The views expressed are those of the authors and not necessarily those of the NHS, the NIHR, the  
15 Department of Health or the Royal Colleges involved in survey distribution.

16 The authors would like to acknowledge Mai Baquedano, at the University of Bristol, for her support  
17 with REDCap, GL Assessments for providing the licence for the GHQ-12 free of charge and Simon  
18 O'Hare, Data and Insight Manager, General Medical Council  
19  
20  
21  
22

### 23 Author Contributions

24 The corresponding author attests that all listed authors meet authorship criteria and that no others  
25 meeting the criteria have been omitted. Tom Roberts (TR) conceived the idea for the study. TR, Edd  
26 Carlton (EC), Jo Daniels (JD), Mark Lyttle (ML), and Blair Graham (BG) were responsible for the initial  
27 study design, which was refined with the help of Katie Samuel (KS), Charles Reynard (CR), Robert  
28 Hirst (RH), Michael Barrett (MB), Daniel Horner (DH) and William Hulme (WH). Expert advice on  
29 psychological assessment scores was provided by JD. WH provided the statistical plan. TR and DH  
30 lead the dissemination of the study in UK Adult Emergency Departments (ED), ML lead the  
31 dissemination of the study in UK and Ireland Paediatric EDs, KS lead the dissemination of the study in  
32 UK Anaesthetic and ICU Departments, MB lead the dissemination of the study in Ireland EDs, along  
33 with John Cronin, James Foley and Etimbuk Umana. Joao Vinagre lead the dissemination in Ireland  
34 ICUs and Anaesthetic Departments. TR coordinated study set-up, finalisation of the study surveys  
35 and finalisations of study protocols. All authors contributed to the final study design and protocol  
36 development, critically revised successive drafts of the manuscript and approved the final version.  
37 The study management group is responsible for the conduct of the study.  
38  
39  
40  
41  
42  
43  
44  
45

### 46 Funding

47 The Chief Investigator is directly funded as a research fellow by the Royal College of Emergency  
48 Medicine. The GHQ-12 is being used under licence from GL assessments; the fee for use of this  
49 instrument within all three surveys has been waived. Dr Carlton is a National Institute for Health  
50 Research Advanced Fellow. The study has direct funding from RCEM. Grant code: G/2020/1.

### 53 Competing interests

54 Many of the authors have been working as frontline clinicians during the COVID-19 pandemic. They  
55 have no competing interests to declare.  
56  
57  
58

### 59 Data Sharing

Deidentified participant data will be made available for 2 years post publication. Requests for access will require HRA and ethical approval and decisions regarding data sharing will be made after discussion with the study senior authors. Statistical code and study figures are available directly from: <https://github.com/wjchulme/TERN-CERA-study/tree/main/outputs>.

#### Trainee Emergency Research Network (TERN) Collaborators:

|   |                        |                                          |   |                               |                                                                                    |
|---|------------------------|------------------------------------------|---|-------------------------------|------------------------------------------------------------------------------------|
| L | Kane                   | Aberdeen Royal Infirmary                 | R | Hannah                        | Royal Alexandra Children's Hospital                                                |
| L | Mackenzie              | Addenbrooke's Hospital, Cambridge        | A | Corfield                      | Royal Alexandra Hospital, Scotland                                                 |
| S | Sharma Hajela          | Addenbrooke's Hospital, Cambridge        | J | Maney                         | Royal Belfast Hospital for Sick Children                                           |
| J | Phizacklea             | Addenbrooke's Hospital, Cambridge        | D | Metcalfe                      | Royal Berkshire Hospital                                                           |
| K | Malik                  | Addenbrooke's Hospital, Cambridge        | S | Timmis                        | Royal Berkshire Hospital                                                           |
| N | Mathai                 | Aintree University Hospital              | C | Williams                      | Royal Bolton Hospital                                                              |
| A | Sattout                | Aintree University Hospital              | R | Newport                       | Royal Bolton Hospital                                                              |
| S | Messahel               | Alder Hey Children's Hospital, Liverpool | D | Bawden                        | Royal Cornwall Hospital                                                            |
| E | Fadden                 | Alder Hey Children's Hospital, Liverpool | A | Tabner                        | Royal Derby Hospital                                                               |
| R | McQuillan              | Altnagelvin Area Hospital, N. Ireland    | H | Malik                         | Royal Devon and Exeter Hospital                                                    |
| B | O'Hare                 | Antrim Area Hospital, N. Ireland         | C | Roe                           | Royal Devon and Exeter Hospital                                                    |
| P | Turton                 | Arrowe Park Hospital, Merseyside         | D | McConnell                     | Royal Devon and Exeter Hospital                                                    |
| S | Lewis                  | Arrowe Park Hospital, Merseyside         | F | Taylor                        | Royal Free London                                                                  |
| D | Bewick                 | Barnsley Hospital                        | R | Ellis                         | Royal Glamorgam Hospital, Wales                                                    |
| R | Taylor                 | Bath Royal United Hospital               | S | Morgan                        | Royal Gwent Hospital, Wales                                                        |
| I | Hancock                | Bath Royal United Hospital               | L | Barnicott                     | Royal Hampshire County Hospital                                                    |
| D | Manthalapo Ramesh Babu | Bedford Hospital, Bedfordshire           | S | Foster                        | Royal Hospital for Children, Glasgow                                               |
| S | Hartshorn              | Birmingham Children's Hospital           | J | Browning                      | Royal Hospital for Sick Children<br>Royal Hospital for Sick Children,<br>Edinburgh |
| M | Williams               | Birmingham Children's Hospital           | L | McCrae                        |                                                                                    |
| A | Charlton               | Bradford Royal Infirmary                 | E | Godden                        | Royal Infirmary Hospital, Edinburgh                                                |
| L | Somerset               | Bristol Royal Hospital for Children      | A | Saunders<br>Lawrence-<br>Ball | Royal Infirmary Hospital, Edinburgh                                                |
| C | Munday                 | Bristol Royal Hospital for Children      | A |                               | Royal Liverpool University Hospital                                                |
| A | Turner                 | Bristol Royal Hospital for Children      | R | House                         | Royal Liverpool University Hospital                                                |
| R | Sainsbury              | Bristol Royal Infirmary                  | J | Muller                        | Royal London Hospital                                                              |
| E | Williams               | Bristol Royal Infirmary                  | I | Skene                         | Royal London Hospital                                                              |
| S | Patil                  | Chelsea & Westminster Hospital           | M | Lim                           | Royal London Hospital                                                              |
| R | Stewart                | Chelsea & Westminster Hospital           | H | Millar                        | Royal Manchester Children's Hospital                                               |
| M | Winstanley             | Chelsea & Westminster Hospital           | A | Rai                           | Royal Manchester Children's Hospital                                               |
| N | Tambe                  | Chesterfield Royal hospital              | K | Challen                       | Royal Preston Hospital                                                             |
| C | Magee                  | City Hospital, Birmingham                | S | Currie                        | Royal Preston Hospital                                                             |
| D | Raffo                  | Craigavon Area Hospital, N. Ireland      | M | Elkanzi                       | Royal Stoke University Hospital                                                    |
| D | Mawhinney              | Craigavon Area Hospital, N. Ireland      | T | Perry                         | Royal Surrey County Hospital                                                       |
| B | Taylor                 | Cumberland Infirmary, Cumbria            | W | Kan                           | Royal Surrey County Hospital                                                       |
| T | Hussan                 | Darlington Memorial Hospital             | L | Brown                         | Royal Sussex County Hospital                                                       |
| G | Pells                  | Darlington Memorial Hospital             | M | Cheema                        | Royal Sussex County Hospital                                                       |
| F | Barham                 | Derriford Hospital, Plymouth             | A | Clarey                        | Royal Victoria Hospital                                                            |
| F | Wood                   | Derriford Hospital, Plymouth             | A | Gulati                        | Royal Victoria Infirmary                                                           |
| C | Szekeres               | East Surrey Hospital                     | K | Webster                       | Royal Victoria Infirmary                                                           |
| R | Greenhalgh             | East Surrey Hospital                     | A | Howson                        | Salford Royal NHS Foundation Trust                                                 |



1  
2  
3  
4  
5  
6  
7  
8  
9  
10  
11  
12  
13  
14  
15  
16  
17  
18  
19  
20  
21  
22  
23  
24  
25  
26  
27  
28  
29  
30  
31  
32  
33  
34  
35  
36  
37  
38  
39  
40  
41  
42  
43  
44  
45  
46  
47  
48  
49  
50  
51  
52  
53  
54  
55  
56  
57  
58  
59  
60

|     |             |                                     |    |           |                                          |
|-----|-------------|-------------------------------------|----|-----------|------------------------------------------|
| S   | Marimuthu   | Eastbourne Hospital                 | R  | Doonan    | Salford Royal NHS Foundation Trust       |
| R   | Macfarlane  | Epsom and St Helier Hospitals       | C  | Magee     | Sandwell Hospital                        |
| M   | Alex        | Evelina Children's Hospital, London | A  | Trimble   | Sheffield Children's Hospital            |
| B   | Shrestha    | Frimley Park Hospital               | C  | O'Connell | Sheffield Children's Hospital            |
| L   | Stanley     | Gloucester Royal Hospital           | R  | Wright    | Southampton General                      |
| J   | Gumley      | Gloucester Royal Hospital           | E  | Colley    | Southmead Hospital, Bristol              |
| K   | Thomas      | Gloucester Royal Hospital           | C  | Rimmer    | Southport Hospital, Merseyside           |
| M   | Anderson    | Great North Children's, Newcastle   | S  | Pintus    | Southport Hospital, Merseyside           |
| C   | Weegenaar   | Great Western Hospital, Swindon     | H  | Jarman    | St George's Hospital, London             |
| J   | Lockwood    | Harrogate Hospital                  | V  | Worsnop   | St George's Hospital, London             |
| T   | Mohamed     | Heartlands's Hospital, Birmingham   | S  | Collins   | St Helier Hospital                       |
| S   | Ramraj      | Hillingdon Hospital, London         | M  | Colmar    | St John's Hospital, Livingston           |
| M   | Mackenzie   | Homerton Hospital, London           | N  | Masood    | St John's Hospital, Livingston           |
| A   | Robertson   | Homerton Hospital, London           | R  | McLatchie | St John's Hospital, Livingston           |
| W   | Niven       | Homerton Hospital, London           | A  | Peasley   | Stepping Hill Hospital                   |
| M   | Patel       | Homerton Hospital, London           | S  | Rahman    | Stoke Mandeville Hospital                |
| S   | Subramaniam | Horton General Hospital, Banbury    | N  | Mullen    | South Tyneside and Sunderland NHS Trust  |
| C   | Holmes      | Huddersfield Royal Infirmary        | L  | Armstrong | The Royal Berkshire Hospital, Reading    |
| S   | Bongale     | Inverclyde Royal Hospital           | A  | Hay       | The Whittington Hospital, London         |
| U   | Bait        | Ipswich Hospital                    | R  | Mills     | The Whittington Hospital, London         |
| S   | Nagendran   | Ipswich Hospital                    | J  | Lowe      | Torbay Hospital, Devon                   |
| S   | Rao         | Ipswich Hospital                    | H  | Raybould  | Torbay Hospital, Devon                   |
| F   | Mendes      | James Paget Hospital                | A  | Ali       | Torbay Hospital, Devon                   |
| P   | Singh       | John Radcliffe Hospital, Oxford     | P  | Cuthbert  | Ulster Hospital Dundonald, N. Ireland    |
| S   | Subramaniam | John Radcliffe Hospital, Oxford     | S  | Taylor    | University College London Hospital       |
| T   | Baron       | John Radcliffe Hospital, Oxford     | V  | Talwar    | University College London Hospital       |
| C   | Ponmani     | King George Hospital                | Z  | Al-Janabi | University Hospital Ayr, Scotland        |
| M   | Depante     | King's College Hospital, London     | C  | Leech     | University Hospital Coventry             |
| R   | Sneep       | King's College Hospital, London     | J  | Turner    | University Hospital Coventry             |
| A   | Brookes     | King's College Hospital, London     | L  | McKechnie | University Hospital Crosshouse, Scotland |
| S   | Williams    | King's College Hospital, London     | B  | Mallon    | University Hospital Crosshouse, Scotland |
| A   | Rainey      | King's College Hospital, London     | J  | McLaren   | University Hospital Crosshouse, Scotland |
| J   | Brown       | Kingston Hospital, London           | Y  | Moulds    | University Hospital Crosshouse, Scotland |
| N   | Marriage    | Kingston Hospital, London           | L  | Dunlop    | University Hospital Hairmyres, Scotland  |
| S   | Manou       | Leeds General Infirmary             | FM | Burton    | University Hospital Hairmyres, Scotland  |
| S   | Hart        | Leeds General Infirmary             | S  | Keers     | University Hospital Lewisham, London     |
| M   | Elsheikh    | Leeds General Infirmary             | L  | Robertson | University Hospital Lewisham, London     |
| L   | Cocker      | Leicester Royal Infirmary           | D  | Craver    | University Hospital Lewisham, London     |
| MH  | Elwan       | Leicester Royal Infirmary           | N  | Moultrie  | University Hospital Monklands, Scotland  |
| K L | Vincent     | Leicester Royal Infirmary           | O  | Williams  | University Hospital of North Tees        |
| C   | Nunn        | Leicester Royal Infirmary           | S  | Purvis    | University Hospital of North Tees        |
| N   | Sarja       | Lister Hospital, Stevenage          | M  | Clark     | University Hospital of North Tees        |
| M   | Viegas      | Luton & Dunstable Hospital          | C  | Davies    | University Hospital of Wales, Cardiff    |
| E   | Wooffinden  | Manchester Royal Infirmary          | S  | Foreman   | University Hospital of Wales, Cardiff    |
| C   | Reynard     | Manchester Royal Infirmary          | C  | Ngua      | University Hospital of Wales, Cardiff    |
| N   | Cherian     | Manchester Royal Infirmary          | D  | George    | University Hospital of Wales, Cardiff    |

1  
2  
3  
4  
5  
6  
7  
8  
9  
10  
11  
12  
13  
14  
15  
16  
17  
18  
19  
20  
21  
22  
23  
24  
25  
26  
27  
28  
29  
30  
31  
32  
33  
34  
35  
36  
37  
38  
39  
40  
41  
42  
43  
44  
45  
46  
47  
48  
49  
50  
51  
52  
53  
54  
55  
56  
57  
58  
59  
60

|   |            |                                           |   |                       |                                        |
|---|------------|-------------------------------------------|---|-----------------------|----------------------------------------|
| A | Da-Costa   | Medway NHS Foundation Trust               | J | Morgan                | University Hospital of Wales, Cardiff  |
| S | Duckitt    | Medway NHS Foundation Trust               | D | George                | University Hospital of Wales, Cardiff  |
| J | Bailey     | Milton Keynes University Hospital         | N | Hoskins               | University Hospital of Wales, Cardiff  |
| L | How        | Milton Keynes University Hospital         | J | Fryer                 | University Hospital Southampton        |
| T | Hine       | Milton Keynes University Hospital         | R | Wright                | University Hospital Southampton        |
| F | Ihsan      | Milton Keynes University Hospital         | L | Frost                 | University Hospital Southampton        |
| H | Abdullah   | Milton Keynes University Hospital         | P | Ellis                 | University Hospital Southampton        |
| K | Bader      | Milton Keynes University Hospital         | A | Mackay                | University Hospital Wishaw, Scotland   |
| S | Pradhan    | Milton Keynes University Hospital         | K | Gray                  | Victoria Hospital, Kirkcaldy, Scotland |
| M | Manoharan  | Milton Keynes University Hospital         | M | Jacobs                | Watford General Hospital               |
| C | Battle     | Morrison Hospital, Wales                  | I | Muslim Veetil<br>Asif | West Middlesex university hospital     |
| L | Kehler     | Wolverhampton NHS Trust                   | P | Amiri                 | West Middlesex university hospital     |
| R | Muswell    | Newham University Hospital, London        | S | Shrivastava           | West Middlesex university hospital     |
| M | Bonsano    | Newham University Hospital, London        | F | Raza                  | West Middlesex university hospital     |
| J | Evans      | Norfolk and Norwich Hospitals             | S | Wilson                | Wexham Park Hospital                   |
| E | Christmas  | North Hampshire Hospital, Basingstoke     | M | Riyat                 | Wexham Park Hospital                   |
| K | Knight     | North Middlesex Hospital, London          | H | Knott                 | Wexham Park Hospital                   |
| L | O'Rourke   | North Tees Hospital, Stockton on Tees     | M | Ramazany              | Whiston Hospital, Merseyside           |
| K | Adeboye    | North Tees Hospital, Stockton on Tees     | S | Langston              | Whiston Hospital, Merseyside           |
| K | Iftikhar   | Northern General Hospital, Sheffield      | N | Abela                 | Whiston Hospital, Merseyside           |
| R | Evans      | Northern General Hospital, Sheffield      | L | Robinson              | Whittington Hospital, London           |
| R | Darke      | Northumbria Specialist Emergency Hospital | D | Maasdorp              | Whittington Hospital, London           |
| R | Freeman    | Northumbria Specialist Emergency Hospital | H | Murphy                | Whittington Hospital, London           |
| E | Grocholski | Northwick Park Hospital, London           | H | Edmundson             | Whittington Hospital, London           |
| K | Kaur       | Peterborough City Hospital                | R | Das                   | Whittington Hospital, London           |
| H | Cooper     | Peterborough City Hospital                | C | Orjioko               | Whittington Hospital, London           |
| M | Mohammad   | Princess Royal Hospital, London           | D | Worley                | Whittington Hospital, London           |
| L | Harwood    | Princess Royal Hospital, London           | W | Collier               | Whittington Hospital, London           |
| K | Lines      | Queen Alexandra Hospital, Portsmouth      | J | Everson               | Whittington Hospital, London           |
| C | Thomas     | Queen Alexandra Hospital, Portsmouth      | N | Maleki                | Whittington Hospital, London           |
| D | Ranasinghe | Queen Alexandra Hospital, Portsmouth      | A | Stafford              | Whittington Hospital, London           |
| S | Hall       | Queen Elizabeth Hospital                  | S | Gokani                | Whittington Hospital, London           |
| J | Wright     | Queen Elizabeth Hospital                  | M | Charalambos           | Whittington Hospital, London           |
| S | Hall       | Queen Elizabeth Hospital                  | A | Olajide               | Whittington Hospital, London           |
| N | Ali        | Queen Elizabeth Hospital                  | C | Bi                    | Whittington Hospital, London           |
| J | Hunt       | Queen Elizabeth Hospital, Birmingham      | J | Ng                    | Whittington Hospital, London           |
| H | Ahmad      | Queen Elizabeth Queen's Mother, Margate   | S | Naeem                 | William Harvey Hospital, Kent          |
| C | Ward       | Queen Elizabeth Hospital, Glasgow         | J | Anandarajah           | Wrexham Maelor Hospital, Wales         |
| M | Khan       | Queens Medical Centre, Nottingham         | A | Hill                  | Wythenshawe Hospital, Manchester       |
| K | Holzman    | Redhill Hospital, Surrey                  | C | Boulind               | Yeovil District Hospital               |
| J | Ritchie    | Rotherham Hospital                        |   |                       |                                        |
| A | Hormis     | Rotherham Hospital                        |   |                       |                                        |

#### Ireland Trainee Emergency Research Network (I-TERN) Collaborators:

|   |            |                                               |
|---|------------|-----------------------------------------------|
| R | O'Sullivan | Bon Secours Hospital Cork, Ireland            |
| S | Gilmartin  | Children's Health Ireland at Crumlin, Ireland |

|    |   |                                                                 |
|----|---|-----------------------------------------------------------------|
| 1  |   |                                                                 |
| 2  |   |                                                                 |
| 3  | S | Uí Bhroin Children's Health Ireland at Tallaght, Ireland        |
| 4  | P | Fitzpatrick Children's Health Ireland at Temple Street, Ireland |
| 5  | A | Patton Cork University Hospital, Ireland                        |
| 6  | M | Jee Poh Hock Galway Hospital, Ireland                           |
| 7  | S | Graham Mater Misericordiae University Hospital, Ireland         |
| 8  | S | Kukawadia Mercy University Hospital, Ireland                    |
| 9  | C | Prendergast Midlands Regional Hospital Tullamore, Ireland       |
| 10 | A | Ahmed Sligo University Hospital, Ireland                        |
| 11 | C | Dalla Vecchia St Vincent's University Hospital, Ireland         |
| 12 | J | Lynch Tallaght University Hospital, Ireland                     |
| 13 | M | Grummell Tallaght University Hospital, Ireland                  |
| 14 | I | Grossi University Hospital Limerick, Ireland                    |
| 15 | B | MacManus University Hospital Waterford, Ireland                 |
| 16 |   |                                                                 |
| 17 |   |                                                                 |
| 18 |   |                                                                 |
| 19 |   |                                                                 |

Research and Audit Federation of Trainees (RAFT), Trainee Research in Intensive Care (TRIC) and Specialist Anaesthesia Trainee led Audit and Research Network (SATURN) Collaborators:

|    |   |                                                    |
|----|---|----------------------------------------------------|
| 20 |   |                                                    |
| 21 |   |                                                    |
| 22 |   |                                                    |
| 23 | K | Samuel North Bristol NHS Trust                     |
| 24 | A | Boyle Royal Victoria Hospital, Belfast             |
| 25 | A | Waite Royal Liverpool University Hospital          |
| 26 | B | Johnson University of Liverpool                    |
| 27 | J | Vinagre Children's Health Ireland at Temple Street |
| 28 |   |                                                    |
| 29 |   |                                                    |
| 30 |   |                                                    |

Figure Legend

- 31
- 32
- 33 Figure 1 Participant Flowchart
- 34 Figure 2 GHQ-12 Scores
- 35 Figure 3 IES-R Scores
- 36 Figure 4 GHQ-12 Variance Explained Model
- 37 Figure 5 IES-R Variance Explained Model
- 38 Figure 6a-f GHQ-12 and IES-R Modelled Outcomes
- 39 Figure 7 IES-R Outcome – Region
- 40
- 41
- 42
- 43
- 44
- 45
- 46
- 47
- 48
- 49
- 50
- 51
- 52
- 53
- 54
- 55
- 56
- 57
- 58
- 59
- 60

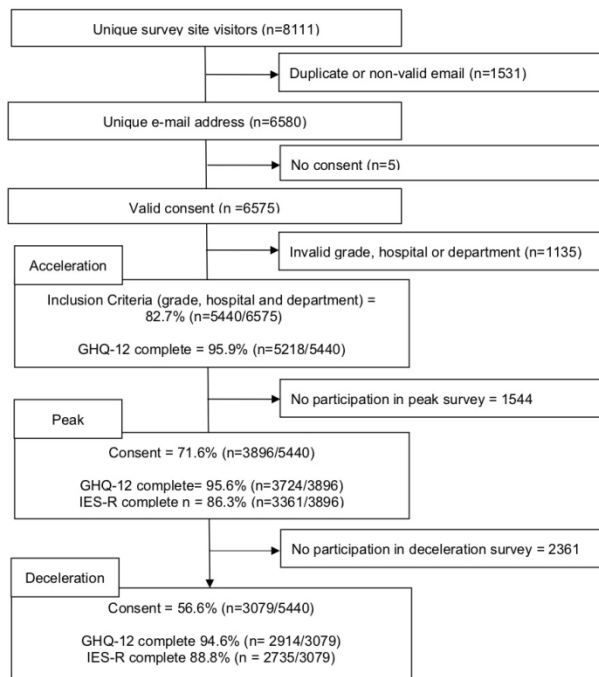

Figure 1. Participant flowchart

209x297mm (150 x 150 DPI)

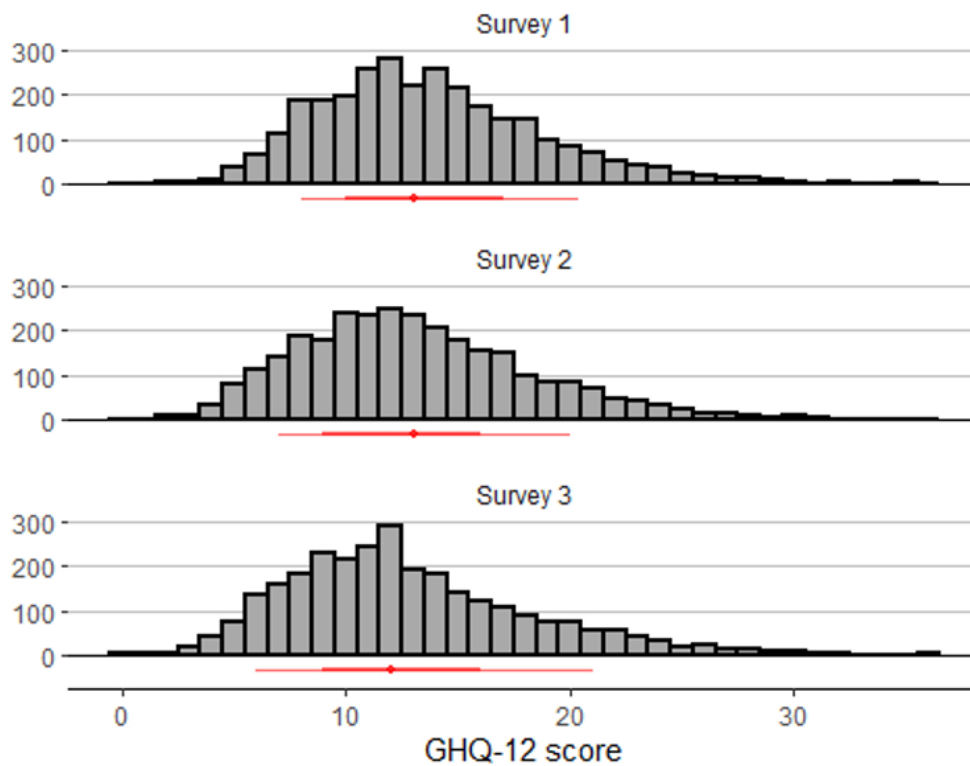

Figure 2. GHQ-12 Scores

1  
2  
3  
4  
5  
6  
7  
8  
9  
10  
11  
12  
13  
14  
15  
16  
17  
18  
19  
20  
21  
22  
23  
24  
25  
26  
27  
28  
29  
30  
31  
32  
33  
34  
35  
36  
37  
38  
39  
40  
41  
42  
43  
44  
45  
46  
47  
48  
49  
50  
51  
52  
53  
54  
55  
56  
57  
58  
59  
60

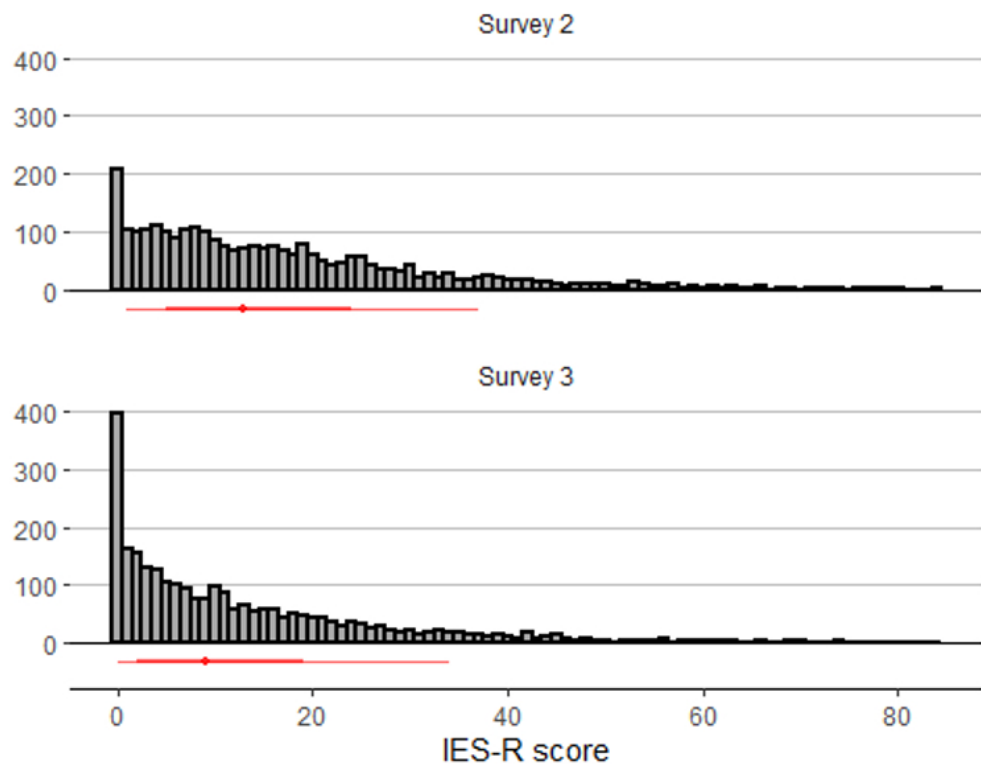

Figure 3. IES-R Scores

Variation in GHQ-12 explained by each model

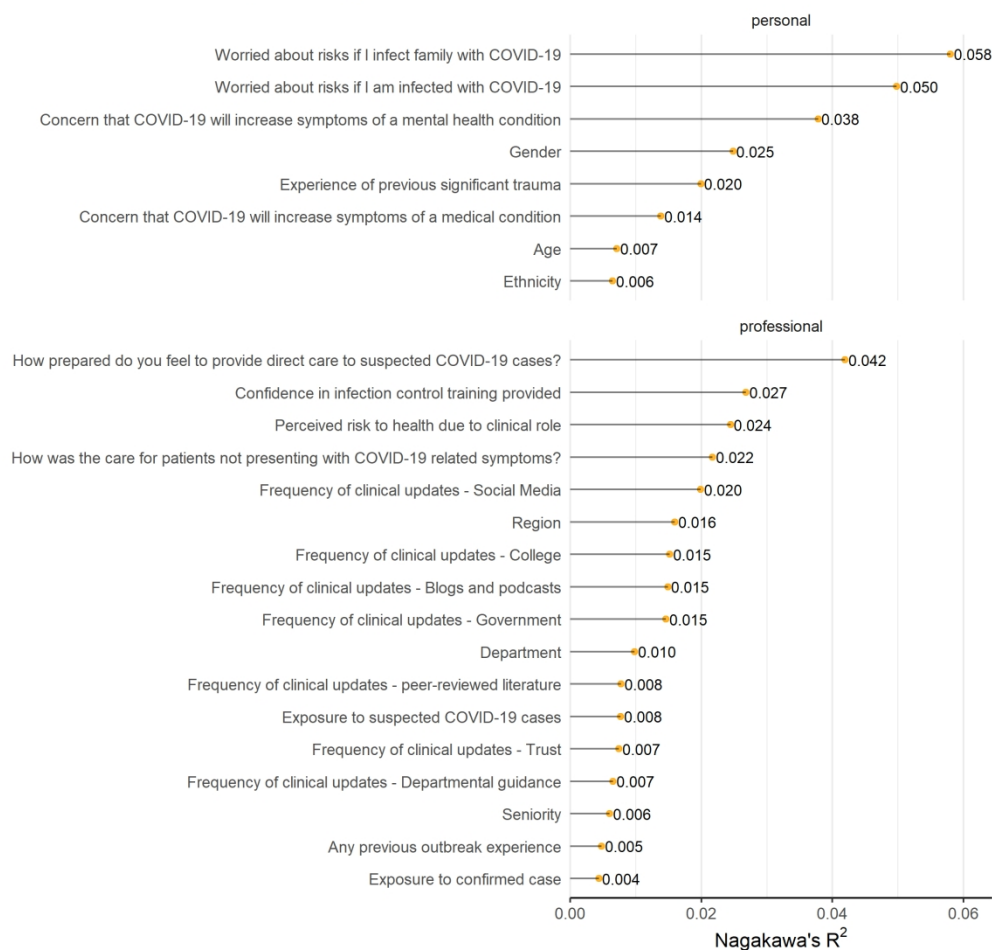

Figure 4. GHQ-12 variance explained model

Variation in IES-R explained by each model

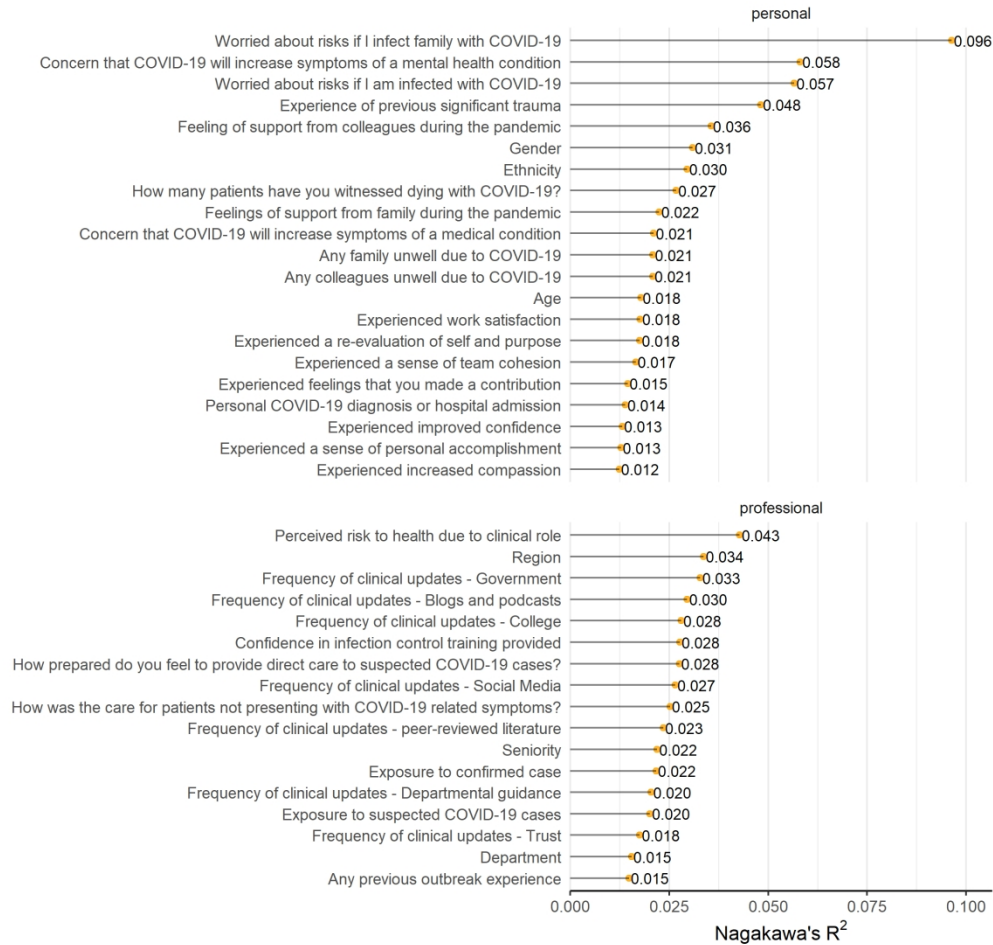

Figure 5. IES-R variance explained model



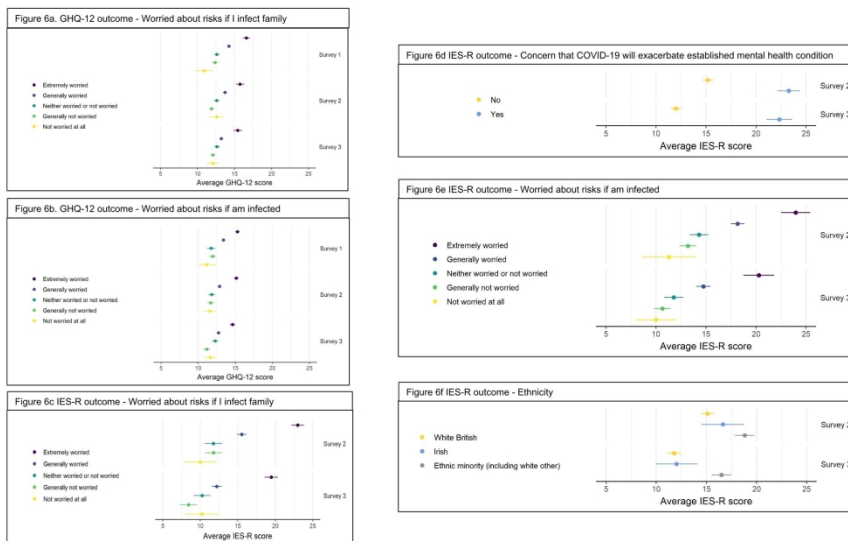

Figure 6a-f - GHQ-12 and IES-R Modelled outcomes.

705x396mm (96 x 96 DPI)

1  
2  
3  
4  
5  
6  
7  
8  
9  
10  
11  
12  
13  
14  
15  
16  
17  
18  
19  
20  
21  
22  
23  
24  
25  
26  
27  
28  
29  
30  
31  
32  
33  
34  
35  
36  
37  
38  
39  
40  
41  
42  
43  
44  
45  
46  
47  
48  
49  
50  
51  
52  
53  
54  
55  
56  
57  
58  
59  
60

Region

- East Midlands
- East of England
- London
- North East
- North West
- South East
- South West
- West Midlands
- Yorkshire and the Humber
- Northern Ireland
- Scotland
- Wales
- Dublin
- Rest of Ireland

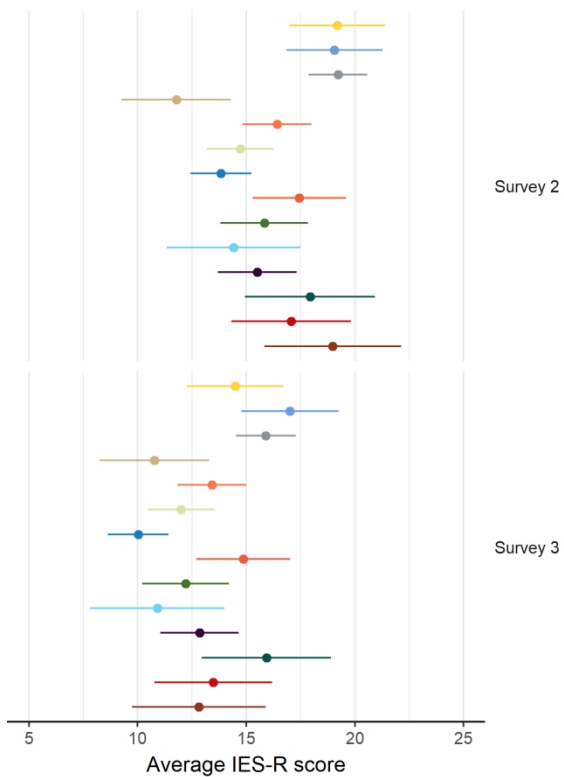

Figure 7. IES-R Outcome - Region

1  
2  
3  
4  
5  
6  
7  
8  
9  
10  
11  
12  
13  
14  
15  
16  
17  
18 ***CERA Online Supplement - Content***  
19

20 ***Page 2 - 3: Drop out GHQ-12 and IES-R for those***  
21 ***participants who did not complete all surveys***  
22 ***compared to those who did***  
23  
24

25  
26 ***Page 4 till end: CERA survey 1,2 and 3***  
27  
28  
29  
30  
31  
32  
33  
34  
35  
36  
37  
38  
39  
40  
41  
42  
43  
44  
45  
46  
47  
48  
49  
50  
51  
52  
53  
54  
55  
56  
57  
58  
59  
60

Drop out rate for surveys 2 and 3 by survey 1 GHQ-12 score



ew only

Drop out rate for survey 3 by survey 2 IES-R score

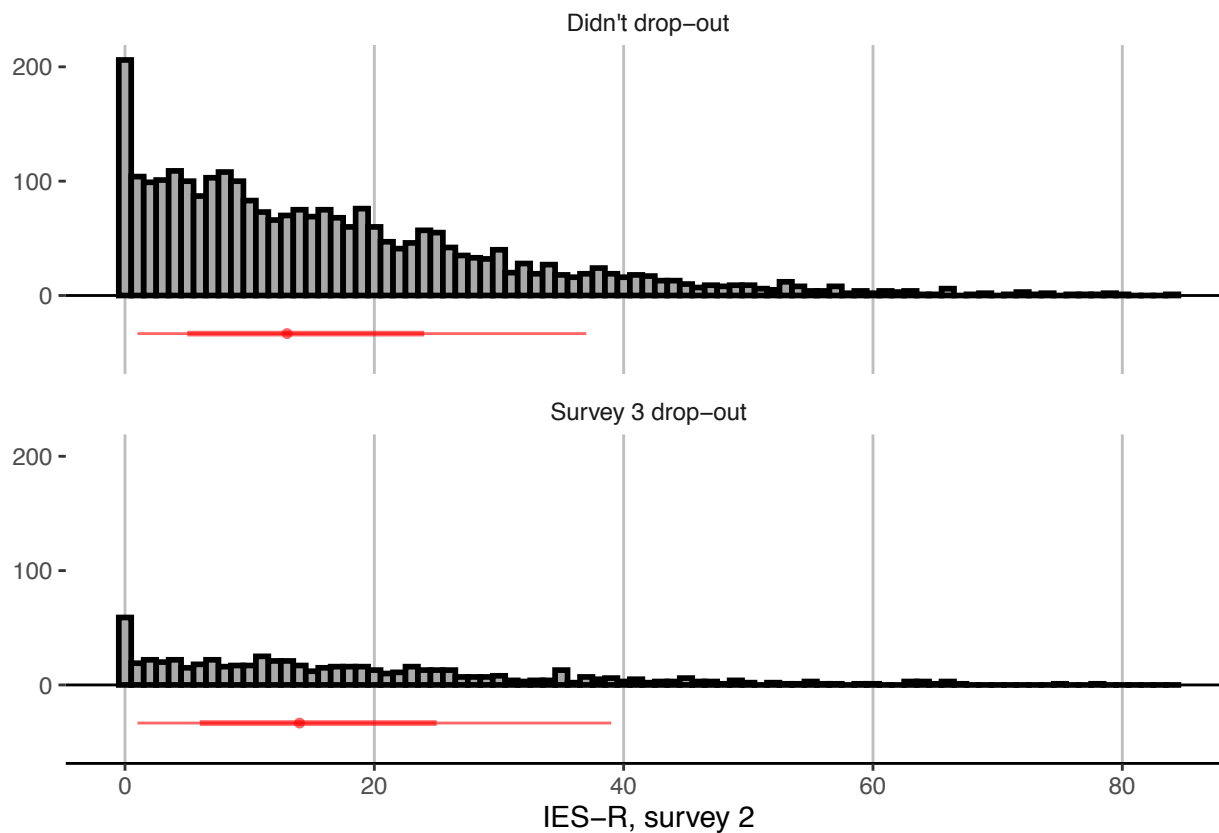

# CERA Survey

Thank you for taking the time to answer these questions. This survey will take less than 4 minutes.

Thank you for taking the time to consider taking part in the COVID-19 Emergency Response Assessment (CERA Study).

It is important that you read this information, so that you understand the purpose of the study and how we will treat your data.

What is the CERA study?

The CERA study consists of three questionnaires that will be conducted during the current COVID-19 outbreak. The CERA study will assess how you are feeling about your general health, anxiety levels, and mood at three points in time. Separate questionnaires will be issued before, during, and after the peak of the current COVID-19 outbreak.

What is the purpose of the CERA study?

This study will provide information regarding how staff working in Emergency care settings are feeling whilst working during the current COVID-19 outbreak. Full analysis of data will help identify how emergency staff can be better supported during future disease outbreaks.

Who has organised the CERA study?

The CERA study is led by the Trainee Emergency Research Network (TERN), in association with the Paediatric Emergency Research in the UK and Ireland (PERUKI) and Research and Audit Federation of Trainees (RAFT). The CERA study is supported by the UK Royal College of Emergency Medicine (RCEM).

Has the CERA study received external approval?

Yes, the CERA study has received University Ethics Approval from the University of Bath (Ref: 4421). The CERA study has been approved by the Health Research Authority (HRA).

What will happen if I take part?

There will be three separate e-surveys to complete, including this one. Each survey is completed online, and will take between about 3 and 5 minutes. Surveys will be issued at different times.

You be required to submit your email address as part of this survey, which will allow us to invite you to participate in the other two surveys. You are not required to submit any additional personal identifiable information. We will remove your email address from data, prior to analysis.

Are there any potential risks?

Some of the issues explored will be sensitive, and we understand that this may be a challenging time for you. We have included some information about sources that you might wish to contact within this survey.

How will you protect my data and ensure confidentiality?

North Bristol NHS Trust is supporting this study and will be responsible for looking after your information and using it properly. The data collected will be stored for 5 years after the study has finished.

Your rights to access, change or move your information are limited, as we need to manage your information in specific ways in order for the research to be reliable and accurate. If you withdraw from the study, we will keep the information about you that we have already obtained. We will collect only personal identifiable information possible.

This study is also compliant with the General Data Protection Regulations (GDPR).

Do I have to take part?

You are under no obligation to take part, and you may withdraw at any point without giving a reason.

What will happen to my data if I withdraw my involvement?

If you choose to withdraw your involvement in the study, any results that you have submitted will be kept for analysis. However, you will not be required to input further into the study. We will need to use information from you for this research project. This information will include your email address. People will use this information to do the research or to check your records to make sure that the research is being done properly. Once we have finished the study, we will keep some of the data so we can check the results. We will write our reports in a way that no-one can work out that you took part in the study.

What are your choices about how your information is used?

You can stop being part of the study at any time, without giving a reason, but we will keep information about you that we already have.

Where can you find out more about how your information is used?

You can find out more about how we use your information

at [www.nhs.uk/information-about-patients/](http://www.nhs.uk/information-about-patients/)

For peer review only: <http://bmjopen.bmj.com/site/about/guidelines.xhtml>

- our leaflet available from [www.nbt.nhs.uk/PatientResearchdata](http://www.nbt.nhs.uk/PatientResearchdata)
- by asking one of the research team
- by contacting Helen Williamson (Head of Information Governance) at [helen.e.williamson@nbt.nhs.uk](mailto:helen.e.williamson@nbt.nhs.uk), or by ringing 0117 41 44767.

Who can I contact if I have any questions?

Please contact Dr Tom Roberts (Chief Investigator) at [tern@rcem.ac.uk](mailto:tern@rcem.ac.uk) if you have any questions.

What to do if you need support about wellbeing

The following organisations can help provide advice and support with regards to your wellbeing.

-Your occupational health department (contact details available via your employer)

-Your general practitioner

- <https://anaesthetists.org/Home/Wellbeing-support>

-BMA Counselling Service (24 Hours). Telephone 0330 123 1245. (Note that you do not have to be a member of the BMA to access this service)

-The Samaritans (24 Hours). Telephone 116 123.

For the attention of Irish Clinicians:

The following organisations can help provide advice and support with regards to your wellbeing in the Republic of Ireland.

-HSE Workplace Health and Wellbeing Unit - Contact Dr Lynda Sisson [HR.wellbeing@hse.ie](mailto:HR.wellbeing@hse.ie)

-The Employee Assistance and Counselling Service (EAC)

-Pieta House [www.pieta.ie](http://www.pieta.ie) or call 188 247 247

-Your Mental Health [www.yourmentalhealth.ie](http://www.yourmentalhealth.ie)

-Practitioner Health (Ireland). Telephone 01 297 0356

Specific Consent statement for the Republic of Ireland

I consent to the processing of my personal data as set out in the information leaflet for the research purposes that are part of the CERA study - Consent using the button in the next question.

---

Do you want to read the participant information sheet now?

Yes  
 No

---

If you would like to download the patient information sheet to read later, please download the link below.

[Attachment: "CERA PIS V 1.1.docx"]

1 **Consent and Identifiers**

2  
3 By checking this box, I certify that I am at least 18  I consent  
4 years old and that I give my consent freely to  
5 participate in this study.

6  
7 What is your e-mail address?

8 \_\_\_\_\_  
9 (This will only be used for the delivery of survey 2  
10 + 3, which you will receive over the coming months)

11  
12  
13  
14  
15  
16  
17  
18  
19  
20  
21  
22  
23  
24  
25  
26  
27  
28  
29  
30  
31  
32  
33  
34  
35  
36  
37  
38  
39  
40  
41  
42  
43  
44  
45  
46  
47  
48  
49  
50  
51  
52  
53  
54  
55  
56  
57  
58  
59  
60

For peer review only



1 **About you**

2  
3  
4  
5  
6  
7  
8  
9  
10  
11  
12  
13  
14  
15  
16  
17  
18  
19  
20  
21  
22  
23  
24  
25  
26  
27  
28  
29  
30  
31  
32  
33  
34  
35  
36  
37  
38  
39  
40  
41  
42  
43  
44  
45  
46  
47  
48  
49  
50  
51  
52  
53  
54  
55  
56  
57  
58  
59  
60

For peer review only

1 What is the name of the hospital where you currently  
2 work?  
3 Please type and your hospital should appear, if not  
4 present select "other"

- Aberdeen Royal Infirmary
- Addenbrooke's Cambridge University Hospital
- Aintree University Hospital
- Airedale NHS Foundation Trust
- Alder Hey Children's Hospital NHS Foundation Trust
- Altnagelvin Area Hospital
- Aneurin Bevan Health Board
- Ayr University Hospital Ayr. NHS A&A
- Havering & Redbridge University Hospitals NHS Trust
- Barnsley hospital NHS foundation trust
- Basingstoke (Hampshire Hospitals NHS Foundation Trust)
- Bedford hospital NHS trust
- Betsi Cadwaladr University Health Board
- Birmingham Children's Hospital
- Bon secours Hospital
- Bradford Teaching Hospitals Foundation Trust
- Brighton and Sussex University Hospitals NHS Trust
- Bristol Royal Hospital for Children
- Bristol Royal Infirmary
- Calderdale Hospital
- Central Manchester NHS trust
- Chelsea & Westminster Hospital
- Children's Health Ireland at Crumlin
- Children's Health Ireland at Tallaght
- Children's Health Ireland at Temple Street
- City Hospitals Sunderland NHS Foundation Trust
- Connolly Blanchardstown Hospital
- Conquest and Easborne Hospitals
- Cork University Hospital
- Countess of Chester NHS Foundation Trust
- County Durham & Darlington NHS Foundation Trust
- Craigavon Hospital
- Croydon
- Cumberland Infirmary
- Daisy Hill Hospital
- Derriford Hospital
- East and North Hertfordshire NHS Trust
- East Lancashire NHS Hospital Trust
- East Sussex Healthcare NHS Trust
- Epsom and St Helier Hospitals
- Evelina London Children's Hospital
- Fairfield
- Forth Valley Hospital
- Frimley Park Hospital
- Galway
- Gateshead Health NHS Foundation Trust
- Gloucestershire Hospitals NHS Foundation Trust
- Good Hope
- Great North Children's Hospital, Newcastle Upon Tyne
- Great Western Hospital, Swindon
- Guy's & St Thomas NHS Foundation Trust
- Harrogate & District NHS Foundation Trust
- Heartlands's Hospital
- Hillingdon Hospital
- Homerton University Hospital
- HSE Ireland - Cork University Hospital
- Huddersfield Royal Infirmary and Calderdale Royal Hospital
- Hull University Hospital
- Inverclyde Royal Hospital
- Ipswich Hospital
- James Cook University Hospital
- James Paget Hospital and NHS Trust Gorleston
- John Radcliffe Hospital
- King's College Hospital
- Kingston University Hospital and NHS Foundation Trust

For peer review only

1  
2  
3  
4  
5  
6  
7  
8  
9  
10  
11  
12  
13  
14  
15  
16  
17  
18  
19  
20  
21  
22  
23  
24  
25  
26  
27  
28  
29  
30  
31  
32  
33  
34  
35  
36  
37  
38  
39  
40  
41  
42  
43  
44  
45  
46  
47  
48  
49  
50  
51  
52  
53  
54  
55  
56  
57  
58  
59  
60

For peer review only

- Lancashire Teaching Hospitals (Royal Preston Hospital)
- Leeds teaching hospitals NHS Trust
- Leicester Royal Infirmary
- Leighton (mid cheshire)
- Lister Hospital
- Liverpool University Hospitals NHS Trust
- Luton and Dunstable University Hospital
- Macclesfield Hospital
- Maidstone and Tunbridge Wells NHS Trust
- Manchester Univeristy NHS Foundation Trust
- Mater Misericordiae University Hospital
- Medway NHS Foundation Trust
- Mid Cheshire Hospitals NHS Foundation Trust
- Milton Keynes University Hospital
- Morriston Hospital
- Musgrove Park Hospital, Taunton
- Newcastle upon Tyne Hospitals NHS Foundation Trust
- Newham University Hospital
- Norfolk & Norwich University Hospital
- Southmead Hospital, North Bristol NHS Trust
- North Hampshire Hospital, Basingstoke
- North Manchester General Hospital
- North Middlesex Hospital
- North Tees and Hartlepool Hospitals NHS Foundation Trust
- Northern Devon Healthcare NHS Trust
- Northern general, Sheffield
- Northumbria Healthcare NHS Trust
- Northwick Park Hospital
- Nottingham University Hospitals NHS Trust
- Oldham
- Ormskirk & District General Hospital
- Peterborough City Hospital
- Portsmouth Hospitals Trust
- Princess Royal Univeristy Hospital
- Queen Alexandra Hospital
- Queen Elizabeth Hospital, Birmingham
- Queen Elizabeth Hospital, Woolwich
- Queen Elizabeth Queen's mother hospital Margate
- Queen Elizabeth University Hospital Glasgow
- Queens Medical Centre (Nottingham)
- Rotherham
- Royal Aberdeen Children's Hospital
- Royal Alexandra Children's Hospital, Brighton
- Royal Alexandra Hospital, Paisley
- Royal Belfast Hospital for Sick Children
- Royal Berkshire Hospital NHS Foundation Trust
- Royal Bolton Foundation Trust
- Royal Cornwall NHS Trust
- Royal Devon & Exeter Hospital
- Royal Free Hospital
- Royal Gwent hospital
- Royal Hampshire County Hospital
- Royal Hospital for Children, Glasgow
- Royal Hospital for Sick Children, Edinburgh
- Royal Infirmary of Edinburgh
- Royal Liverpool
- Royal London Hospital
- Royal Manchester Children's Hospital
- Royal Preston Hospital
- Royal Stoke University Hospital
- Royal Surrey County Hospital
- Royal Surrey NHS Foundation Trust
- Royal Sussex county hospital
- Royal United Hospital, Bath
- Royal Victoria Hospital, Belfast
- Royal Victoria Infirmary, Newcastle
- Royal Wolverhampton NHS Trust
- Salford Royal NHS Foundation Trust
- Salisbury NHS Foundation Trust

1  
2  
3  
4  
5  
6  
7  
8  
9  
10  
11  
12  
13  
14  
15  
16  
17  
18  
19  
20  
21  
22  
23  
24  
25  
26  
27  
28  
29  
30  
31  
32  
33  
34  
35  
36  
37  
38  
39  
40  
41  
42  
43  
44  
45  
46  
47  
48  
49  
50  
51  
52  
53  
54  
55  
56  
57  
58  
59  
60

- Sandwell and West Birmingham NHS Foundation Trust
- Scarborough Hospital
- Sheffield Children's Hospital
- Sheffield Teaching Hospitals Foundation NHS Trust
- South Eastern Health and Social Care Trust
- Southampton Children's Hospital
- Southport
- Southport & Ormskirk Hospital
- St George's Hospital London
- St Helen's and Knowsley NHS trust
- St John's Hospital, Livingston
- St Mary's Hospital
- Stockport NHS Trust
- Stoke Mandeville Hospital
- Sunderland and South Tyneside NHS Foundation Trust
- Surrey and Sussex Healthcare NHS Trust
- Torbay and South Devon NHS Trust
- Tunbridge Wells NHS Trust
- Ulster Hospital Dundonald
- University College London Hospitals NHS Trust
- University Hospital Ayr
- University Hospital Coventry
- University Hospital Crosshouse
- University Hospital Lewisham
- University Hospital Monklands
- University Hospital of Wales, Cardiff
- University hospital Southampton
- University Hospital Waterford
- University Hospital Wishaw
- University Hospitals Birmingham
- University Hospitals Coventry & Warwickshire NHS
- University Hospitals Derby and Burton NHS Foundation
- University Hospitals of Leicester NHS Trust
- University Hospitals of North Midlands
- University Hospitals Plymouth
- Warwick Hospital
- Watford General Hospital (West Herts NHS Trust)
- West Middlesex
- Western Sussex Hospitals NHS Trust
- Wexham Park Hospital
- Whipp's Cross Hospital
- Whiston Hospital
- Whittington Health NHS Trust
- William Harvey Hospital
- Wrexham Maelor Hospital
- Yeovil District Hospital NHS Foundation Trust
- York Teaching Hospital NHSFT
- Other
- Wythenshawe Hospital
- Antrim Area Hospital
- Arroe park hospital
- St Peter's Hospital
- Balfour Hospital, Orkney
- Barking havering and redbridge university hospitals NHS foundation trust
- Barnet Hospital
- Basildon
- Belfast City Hospital
- Blackpool Victoria Hospital
- BMI Sarum Rd Winchester
- Broomfield Hospital
- Causeway hospital
- Charing Cross Hospital, London
- Chesterfield Royal Hospital
- Colchester General Hospital
- Darent Valley Hospital
- Dartford and Gravesham NHS Trust
- Diana Princess of Wales, Grimsby
- Doncaster Royal Infirmary
- Dorset County Hospital

1  
2  
3  
4  
5  
6  
7  
8  
9  
10  
11  
12  
13  
14  
15  
16  
17  
18  
19  
20  
21  
22  
23  
24  
25  
26  
27  
28  
29  
30  
31  
32  
33  
34  
35  
36  
37  
38  
39  
40  
41  
42  
43  
44  
45  
46  
47  
48  
49  
50  
51  
52  
53  
54  
55  
56  
57  
58  
59  
60

- Dudley Group NHS Foundation Trust
- Dumfries and Galloway Royal Infirmary
- Ealing
- East Surrey Hospital
- Freeman Hospital, Newcastle
- Galngwili General Hospital
- George Eliot Hospital Nuneaton
- Glan Clwyd hospital
- Glangwili General Hospital Carmarthen Wales
- Glasgow Royal Infirmary
- Glen field Leicester
- GP Woodlands primary care sidcup
- Great Ormond Street Hospital
- Grimsby hospital.
- Hammersmith Hospital London
- Harefield
- Hereford County Hospital
- HMS Raleigh
- Horton General Hospital Banbury
- Hull University Teaching hospitals NHS Trust
- Kent and Canterbury Hospital
- Kettering General Hospital
- Kings Mill Hospital
- Lincoln county hospital
- Liverpool Heart and Chest Hospital
- Liverpool Women's Hospital
- Mid Essex NHS Trust
- Mid yorkshire hospital
- Moorfields Eye Hospital
- National Hospital for Neurology and Neurosurgery
- Nevill Hall Hospital
- New Cross Hospital
- Ninewells Hospital, Dundee
- Northampton General Hsopital
- Northern Lincolnshire and Goole NHS Foundation Trust
- Oxford University Hospital
- Perth Royal Infirmary
- Pilgrim Hospital Boston Lincolnshire
- Pinderfields general Hospital, Wakefield
- Poole
- Prince Charles Hospital
- Princess of Wales Hospital, Bridgend
- Princess Royal Hospital, Shrewsbury and Telford Hospitals NHS Trust
- Queen Charlotte's and Chelsea Hospital
- Queen Elizabeth Hospital Gateshead
- Queen Elizabeth Hospital King's Lynn
- Queen Victoria Hospital, East Grinstead
- Queens Hospital - Romford
- Raigmore Hospital
- Raigmore Hospital, Inverness
- Robert Jones & Agnes Hunt Orthopaedic Hospital
- Royal Blackburn
- Royal Bournemouth NHS Trust
- Royal Brompton
- Royal Glamorgan Hospital
- Royal Lancaster Infimary
- Royal Marsden hospital
- Royal National Orthopaedic Hospital
- Royal Orthopaedic Hospital Birmingham
- Royal Papworth Hospital
- Royal Shrewsbury Hospital
- Russells Hall Hospital, Dudley
- Scunthorpe General Hospital
- Sherwood Forest nhs trust
- Southend University Hospital
- St Bartholomew's Hospital London
- St Peter's, Chertsey (Ashford and St Peter's Trust)
- St. Bartholomew's Hospital
- St. Mary's Hospital, Imperial College Healthcare

## NHS Trust

- 1  Tameside and Glossop
- 2  The Balfour , Orkney
- 3  The Horton General Hospital
- 4  The Porch Surgery
- 5  The Queen Elizabeth Hospital, King's Lynn
- 6  The Royal Oldham Hospital
- 7  University Hospitals of Morecambe Bay Foundation
- 8  trust
- 9  Walton centre
- 10  Warrington and Halton Teaching Hospitals NHS
- 11  Foundation Trust
- 12  Wasall Manor Hospital
- 13  West cumberland hospital
- 14  West Middlesex University Hospital
- 15  West Suffolk hospital
- 16  Western General Hospital Edinburgh
- 17  Wirral University Teaching Hospital
- 18  Worcestershire Royal Hospital
- 19  Worthing Hospital
- 20  Wrightington Wigan and Leigh NHS Foundation Trust
- 21  Wycombe Hospital Buckinghamshire NHS Trust
- 22  Ysbyty Gwynedd
- 23  University Hospital Hairmyres

24 You have selected other, please specify.

25 \_\_\_\_\_

26 What is your professional grade?

- 27  GP Trainee
- 28  ST1
- 29  ST2
- 30  ST3
- 31  ST4
- 32  ST5
- 33  ST6
- 34  ST7
- 35  ST8
- 36  F1
- 37  F2
- 38  Clinical Fellow (F2-ST3 Level)
- 39  Clinical Fellow (>=ST4 Level)
- 40  Consultant
- 41  Associate Specialist
- 42  Staff Grade
- 43  CESR Doctor
- 44  GP
- 45  Other

46 You have selected other, please specify.

47 \_\_\_\_\_

48 What is your gender?

- 49  Male
- 50  Female
- 51  Other
- 52  Prefer not to say
- 53
- 54
- 55
- 56
- 57
- 58
- 59
- 60

- 1 How old are you?  20-25  
2  26-30  
3  31-35  
4  36-40  
5  41-45  
6  46-50  
7  51-55  
8  56-60  
9  61-65  
10  66-70  
11  >70

- 13 What is your 'parent speciality'?  Emergency Medicine  
14  Anaesthetics  
15  Intensive Care Medicine  
16  Paediatrics  
17  General Practice  
18  Surgery  
19  Foundation Programme  
20  Acute Internal Medicine  
21  Other

- 23 What is your 'parent speciality'?  Emergency Medicine  
24  Anaesthetics  
25  Intensive Care Medicine  
26  Paediatrics  
27  General Practice  
28  Surgery  
29  Foundation Programme  
30  Acute Internal Medicine  
31  Other

33 You have selected other, please specify.  
34 \_\_\_\_\_  
35

- 36 In what Department were you working as of March 1st  
37 2020?  Emergency Department (adult or paediatric)  
38  Anaesthetic Department (adult or paediatric)  
39  Intensive Care Department (adult or paediatric)  
40  Acute Medical Unit  
41  Hospital ward (adult or paediatric)  
42  Other

- 43 In what Department were you working as of March 1st  
44 2020?  Emergency Department (adult or paediatric)  
45  Anaesthetic Department (adult or paediatric)  
46 Select all that apply  Intensive Care Department (adult or paediatric)  
47  Acute Medical Unit  
48  Hospital ward (adult or paediatric)  
49  Other

50 You selected other, in which Department where you  
51 working as of March 1st 2020?  
52 \_\_\_\_\_  
53  
54

- 55 Have you been deployed to a different clinical area  
56 as a result of the COVID-19 outbreak?  Yes  
57  No  
58  
59  
60

1 Where have you been redeployed to?  
2  
3  
4  
5  
6  
7

- Emergency Department (adult or paediatric)
- Anaesthetic Department (adult or paediatric)
- Intensive Care Department (adult or paediatric)
- Acute Medical Unit
- Hospital ward (adult or paediatric)
- Other

8 You have selected other, please specify.  
9 \_\_\_\_\_  
10

11  
12 How satisfied are you with this redeployment?  
13  
14  
15  
16  
17

- Very dissatisfied
- Somewhat dissatisfied
- Neither satisfied nor dissatisfied
- Somewhat satisfied
- Very satisfied

18 Have you previously provided direct clinical care to  
19 any patients affected by these infectious disease  
20 outbreaks? (please select all that apply)  
21  
22  
23  
24  
25  
26  
27

- None of the below
- Ebola virus
- MERS-CoV
- SARS
- Chikungunya
- Cholera
- Influenza (swine, avian, zoonotic)
- Zika virus
- Other

28 You have selected other, please specify.  
29 \_\_\_\_\_  
30  
31  
32  
33  
34  
35  
36  
37  
38  
39  
40  
41  
42  
43  
44  
45  
46  
47  
48  
49  
50  
51  
52  
53  
54  
55  
56  
57  
58  
59  
60



**Personal Protective Equipment (PPE) and General Training****What training have you received in regards to personal protective equipment (PPE) since the COVID-19 outbreak was declared? (select all that apply)**

|                                                                             | No training              | Formal instructional video | Written instruction      | Simulation training      | Departmental guidance    | Other                    |
|-----------------------------------------------------------------------------|--------------------------|----------------------------|--------------------------|--------------------------|--------------------------|--------------------------|
| Donning and doffing (gloves, gown, facemask, eye protection)                | <input type="checkbox"/> | <input type="checkbox"/>   | <input type="checkbox"/> | <input type="checkbox"/> | <input type="checkbox"/> | <input type="checkbox"/> |
| Formal fit testing for mask                                                 | <input type="checkbox"/> | <input type="checkbox"/>   | <input type="checkbox"/> | <input type="checkbox"/> | <input type="checkbox"/> | <input type="checkbox"/> |
| PPE training for exposure to aerosol generating procedure (e.g. intubation) | <input type="checkbox"/> | <input type="checkbox"/>   | <input type="checkbox"/> | <input type="checkbox"/> | <input type="checkbox"/> | <input type="checkbox"/> |

Other. Please specify.

\_\_\_\_\_

If you have had any further PPE training please specify

\_\_\_\_\_

What practical education have you received in regards to the clinical care of patients presenting with suspected/diagnosed COVID-19?

- None  
 Simulation training of a possible case  
 Simulation training of a case requiring aerosol procedure  
 Other

You selected other. Please specify.

\_\_\_\_\_

**How frequently do you access the following sources of information regarding policy and clinical aspects of COVID-19?**

|                           | Hourly                | Up to twice a day     | Daily                 | Several times a week  | Weekly                | Less than weekly      | Never                 |
|---------------------------|-----------------------|-----------------------|-----------------------|-----------------------|-----------------------|-----------------------|-----------------------|
| Government Guidance       | <input type="radio"/> |
| College Guidance          | <input type="radio"/> |
| Trust Guidance            | <input type="radio"/> |
| Departmental guidance     | <input type="radio"/> |
| Social Media              | <input type="radio"/> |
| Online blogs and podcasts | <input type="radio"/> |
| Peer review literature    | <input type="radio"/> |

How confident do you feel in the infection control training that has been provided to you?

Not confident at all  
 Somewhat not confident  
 Neither not confident or confident  
 Somewhat confident  
 Very confident

How prepared do you feel to provide direct care to suspected cases?

Completely unprepared  
 Somewhat unprepared  
 Neither unprepared or prepared  
 Somewhat prepared  
 Very prepared

How do you feel the care received by patients who are NOT presenting with either symptoms or a diagnosis of COVID-19 is?

Significantly worse than before Covid-19  
 Slightly worse than before Covid-19  
 The same as before Covid-19  
 Slightly better than before Covid-19  
 Significantly better than before Covid-19

How many suspected cases of COVID-19 have you had direct clinical contact with since March 1st 2020?

0  
 1-5  
 6-10  
 11-15  
 16-20  
 21-25  
 26-30  
 31-35  
 > 36

As far as you are aware, how many of these suspected cases have turned out to be confirmed cases of COVID-19?

0  
 1-5  
 6-10  
 11-15  
 16-20  
 21-25  
 26-30  
 31-35  
 > 36

**Personal Factors**

Are you concerned that the exposure to the COVID-19 outbreak may increase symptoms of any established medical health conditions?

- Yes  
 No  
 Prefer not to disclose  
 I do not have an established medical condition

Are you concerned that the exposure to the COVID-19 outbreak may increase symptoms of any established mental health conditions?

- Yes  
 No  
 Prefer not to disclose  
 I do not have an established mental health condition

I feel that my personal health is at risk during the COVID-19 outbreak due to my clinical role?

- Strongly disagree  
 Disagree  
 Neither agree nor disagree  
 Agree  
 Strongly agree

How worried are you about the potential risks if you were to become infected with COVID-19?

- Extremely worried  
 Generally worried  
 Neither worried or not worried  
 Generally not worried  
 Not worried at all

How worried are you about the potential risks to your family, loved ones or others due to your clinical role in the COVID-19 outbreak?

- Extremely worried  
 Generally worried  
 Neither worried or not worried  
 Generally not worried  
 Not worried at all

1 **PERA Questions: Self-isolate**

2  
3 Have you had to self-isolate?

- 4  Yes  
5  No

6 For what reason did you have to self-isolate?

- 7  Personal symptoms  
8  Personal diagnosis of COVID-19  
9  Symptoms of a member of the household  
10  Exposure to a positive case of COVID-19 in the  
11 work environment  
12  Exposure to a positive case of COVID-19 in your  
13 personal environment  
14  Other (eg return from travel to high risk area)

15 Other - please specify

16 \_\_\_\_\_

17  
18 How many clinical shifts in your rota have you missed  
19 due to self-isolation?

- 20  0  
21  1  
22  2  
23  3  
24  4  
25  5-7  
26  8-10  
27  >10

28 Date survey completed

29 \_\_\_\_\_

## CERA Survey 2

Thank you for taking the time to complete the CERA survey part 2.

This is part 2 of the CERA study. Thank you for taking the time to fill out the questions below. It will take between 5 to 7 minutes.

We recommend using either a tablet or computer screen but the questions are accessible via mobile phones.

The Impact of Events Scale - Revised (page 3) should be answered in reference to the COVID-19 peak and your feelings over the last 7 days. All other questions should be answered in reference to the COVID-19 peak and your feelings over the past few weeks.

The definition of COVID-19 "peak", for the purpose of this study, uses nationally reported hospital death figures. This has been estimated between April 10th - April 15th. It is understood this will vary regionally.

Finally, we understand that throughout the COVID-19 pandemic many of you may have experienced very challenging events both in your personal and professional lives. We thank you for taking the time to complete this study and hope it offers an anonymised opportunity to report the psychological impact of this pandemic. If you need any further support there are details highlighted in the participant information leaflet that can be downloaded below.

If you want to download the participant information leaflet, which outlines the study and available support, please download below.

[Attachment: "CERA PIS V 1.1.docx"]

I consent to taking part in CERA survey 2.

- Yes  
 No

What is your ethnicity?

- English / Welsh / Scottish / Northern Irish / British  
 Irish  
 Gypsy or Irish Traveller  
 Any other White background  
 White and Black Caribbean  
 White and Black African  
 White and Asian  
 Any other Mixed / Multiple ethnic background  
 Indian  
 Pakistani  
 Bangladeshi  
 Chinese  
 Any other Asian background  
 African  
 Caribbean  
 Any other Black / African / Caribbean background  
 Arab  
 Any other ethnic group  
 Prefer not to disclose

**Impact of Events Scale - Revised**

**Below is a list of difficulties people sometimes have after stressful life events. Please read each item, and then indicate how distressing each difficulty has been for you DURING THE PAST SEVEN DAYS with respect to the COVID-19 PANDEMIC PEAK.**

**How much have you been distressed or bothered by these difficulties?**

|                                                                                                                       | Not at all            | A little bit          | Moderately            | Quite a bit           | Extremely             |
|-----------------------------------------------------------------------------------------------------------------------|-----------------------|-----------------------|-----------------------|-----------------------|-----------------------|
| Any reminder brought back feelings about it                                                                           | <input type="radio"/> |
| I had trouble staying asleep                                                                                          | <input type="radio"/> |
| Other things kept me thinking about it                                                                                | <input type="radio"/> |
| I felt irritable and angry                                                                                            | <input type="radio"/> |
| I avoided letting myself get upset when I thought about it or was reminded of it                                      | <input type="radio"/> |
| I thought about it when I didn't mean to                                                                              | <input type="radio"/> |
| I felt as if it hadn't happened or wasn't real                                                                        | <input type="radio"/> |
| I stayed away from reminders of it                                                                                    | <input type="radio"/> |
| Pictures about it popped into my head                                                                                 | <input type="radio"/> |
| I was jumpy and easily startled                                                                                       | <input type="radio"/> |
| I tried not to think about it                                                                                         | <input type="radio"/> |
| I was aware that I still had a lot of feelings about it, but I didn't deal with them                                  | <input type="radio"/> |
| My feelings about it were kind of numb                                                                                | <input type="radio"/> |
| I found myself acting or feeling like I was back at that time                                                         | <input type="radio"/> |
| I had trouble falling asleep                                                                                          | <input type="radio"/> |
| I had waves of strong feelings about it                                                                               | <input type="radio"/> |
| I tried to remove it from my memory                                                                                   | <input type="radio"/> |
| I had trouble concentrating                                                                                           | <input type="radio"/> |
| Reminders of it caused me to have physical reactions, such as sweating, trouble breathing, nausea or a pounding heart | <input type="radio"/> |

- |   |                              |                       |                       |                       |                       |                       |
|---|------------------------------|-----------------------|-----------------------|-----------------------|-----------------------|-----------------------|
| 1 | I had dreams about it        | <input type="radio"/> |
| 2 | I felt watchful and on-guard | <input type="radio"/> |
| 3 |                              |                       |                       |                       |                       |                       |
| 4 | I tried not to talk about it | <input type="radio"/> |

- 5
- 6
- 7
- 8
- 9
- 10
- 11
- 12
- 13
- 14
- 15
- 16
- 17
- 18
- 19
- 20
- 21
- 22
- 23
- 24
- 25
- 26
- 27
- 28
- 29
- 30
- 31
- 32
- 33
- 34
- 35
- 36
- 37
- 38
- 39
- 40
- 41
- 42
- 43
- 44
- 45
- 46
- 47
- 48
- 49
- 50
- 51
- 52
- 53
- 54
- 55
- 56
- 57
- 58
- 59
- 60

For peer review only

**Personal Protective Equipment (PPE) and General Training**

**What training have you received in regards to personal protective equipment (PPE) since the COVID-19 outbreak was declared? (select all that apply)**

|                                                                             | No training              | Formal instructional video | Written instruction      | Simulation training      | Departmental guidance    | Other                    |
|-----------------------------------------------------------------------------|--------------------------|----------------------------|--------------------------|--------------------------|--------------------------|--------------------------|
| Donning and doffing (gloves, gown, facemask, eye protection)                | <input type="checkbox"/> | <input type="checkbox"/>   | <input type="checkbox"/> | <input type="checkbox"/> | <input type="checkbox"/> | <input type="checkbox"/> |
| Formal fit testing for mask                                                 | <input type="checkbox"/> | <input type="checkbox"/>   | <input type="checkbox"/> | <input type="checkbox"/> | <input type="checkbox"/> | <input type="checkbox"/> |
| PPE training for exposure to aerosol generating procedure (e.g. intubation) | <input type="checkbox"/> | <input type="checkbox"/>   | <input type="checkbox"/> | <input type="checkbox"/> | <input type="checkbox"/> | <input type="checkbox"/> |

What practical education have you received in regards to the clinical care of patients presenting with suspected/diagnosed COVID-19? (select all that apply)

None  
 Simulation training of a possible case  
 Simulation training of a case requiring aerosol generating procedure  
 Other

You have selected other, please specify.

\_\_\_\_\_

How confident do you feel in the infection control training that has been provided to you?

Not confident at all  
 Somewhat not confident  
 Neither not confident or confident  
 Somewhat confident  
 Very confident

How prepared do you feel to provide direct care to suspected cases?

Completely unprepared  
 Somewhat unprepared  
 Neither unprepared or prepared  
 Somewhat prepared  
 Very prepared

How do you feel the care received by patients who are NOT presenting with either symptoms or a diagnosis of COVID-19 is?

Significantly worse than before Covid-19  
 Slightly worse than before Covid-19  
 The same as before Covid-19  
 Slightly better than before Covid-19  
 Significantly better than before Covid-19

Have you been deployed to a different clinical area as a result of the COVID-19 outbreak?

Yes  
 No

Where have you been redeployed to?

Emergency Department (adult or paediatric)  
 Anaesthetic Department (adult or paediatric)  
 Intensive Care Department (adult or paediatric)  
 Acute Medical Unit  
 Hospital ward (adult or paediatric)  
 Other

You have selected other, please specify.

\_\_\_\_\_



1 How satisfied are you with this redeployment?  Very dissatisfied  
2  Somewhat dissatisfied  
3  Neither satisfied nor dissatisfied  
4  Somewhat satisfied  
5  Very satisfied  
6

7 In survey 1, you stated you had been re-deployed. How  
8 satisfied are you with this redeployment now?  Very dissatisfied  
9  Somewhat dissatisfied  
10  Neither satisfied nor dissatisfied  
11  Somewhat satisfied  
12  Very satisfied  
13  I am no longer re-deployed

14 How many suspected cases of COVID-19 have you had  
15 direct clinical contact with since March 1st 2020?  0  
16  1-5  
17  6-10  
18  11-15  
19  16-20  
20  21-25  
21  26-30  
22  31-35  
23  > 36

24 As far as you are aware, how many of these suspected  
25 cases have turned out to be confirmed cases of  
26 COVID-19?  0  
27  1-5  
28  6-10  
29  11-15  
30  16-20  
31  21-25  
32  26-30  
33  31-35  
34  > 36

35 How many patients have you witnessed dying with  
36 COVID-19?  0  
37  1-5  
38  6-10  
39  11-15  
40  16-20  
41  21-25  
42  26-30  
43  31-35  
44  > 36  
45  
46  
47  
48  
49  
50  
51  
52  
53  
54  
55  
56  
57  
58  
59  
60

**Personal Factors**

Do you have a pre-existing physical health condition(s) that may increase your chances of suffering more severe COVID-19 disease?

- Yes  
 No  
 Prefer not to disclose

Are you concerned that the exposure to the COVID-19 outbreak may increase symptoms of any established mental health conditions?

- Yes  
 No  
 Prefer not to disclose  
 I do not have an established mental health condition

Over the course of your life prior to the recent pandemic, have you experienced what you would characterise as a significant trauma?

- Yes  
 No

During the COVID-19 pandemic, have you felt at high risk of dying/death?

- Yes  
 No

I feel that my personal health is at risk during the COVID-19 outbreak due to my clinical role?

- Strongly disagree  
 Disagree  
 Neither agree nor disagree  
 Agree  
 Strongly agree

How worried are you about the potential risks if you were to become infected with COVID-19?

- Extremely worried  
 Generally worried  
 Neither worried or not worried  
 Generally not worried  
 Not worried at all

How worried are you about the potential risks to your family, loved ones or others due to your clinical role in the COVID-19 outbreak?

- Extremely worried  
 Generally worried  
 Neither worried or not worried  
 Generally not worried  
 Not worried at all

Have any of your family, friends or loved ones become unwell or died due to COVID-19 or its complications? (select all that apply)

- Unwell at home  
 Unwell and required ward level/HDU hospital treatment  
 Unwell and required ICU treatment  
 Died  
 None of the above

Have any of your colleagues become unwell or died due to COVID-19 or its complications? (select all that apply)

- Unwell at home  
 Unwell and required ward level/HDU hospital treatment  
 Unwell and required ICU treatment  
 Died  
 None of the above

In the last 2 weeks I have felt well supported by friends and family

- Strongly disagree  
 Disagree  
 Neither agree nor disagree  
 Agree  
 Strongly agree

1 In the last 2 weeks I have felt well supported by the  
2 senior clinical leadership team

- Strongly disagree
- Disagree
- Neither agree nor disagree
- Agree
- Strongly agree

3  
4  
5  
6  
7  
8  
9  
10  
11  
12  
13  
14  
15  
16  
17  
18  
19  
20  
21  
22  
23  
24  
25  
26  
27  
28  
29  
30  
31  
32  
33  
34  
35  
36  
37  
38  
39  
40  
41  
42  
43  
44  
45  
46  
47  
48  
49  
50  
51  
52  
53  
54  
55  
56  
57  
58  
59  
60

For peer review only

**Personal Coronavirus**

Have you received a positive diagnosis of Coronavirus during this pandemic?  Yes  
 No

Have you been admitted to hospital due to your diagnosis of Coronavirus?  Yes  
 No

Have you had to self-isolate?  Yes  
 No

For what reason did you have to self-isolate? (select all that apply)

- Personal symptoms
- Personal diagnosis of COVID-19
- Symptoms of a member of the household
- Exposure to a positive case of COVID-19 in the work environment
- Exposure to a positive case of COVID-19 in your personal environment
- Other (eg return from travel to high risk area)

How many clinical shifts in your rota have you missed due to self-isolation?  0  
 1  
 2  
 3  
 4  
 5-7  
 8-10  
 >10

Have you been offered any of the following psychological interventions via your current place of work? (Select all that apply)

- Structured individual therapy with a therapist (in person/on telephone)
- Advice line / helpline
- Internet based psychological intervention
- Well-being app / website
- Brief TRiM / "safe space" session (trauma risk management)
- Other please state

Other, please specify \_\_\_\_\_

During your time working in the COVID-19 pandemic have you experienced any of the following? (Select all that apply)

- Feelings that you made a contribution
- A sense of personal accomplishment
- Improved confidence and self esteem
- Increased compassion
- Re-evaluation of self and purpose
- Work satisfaction
- A sense of team cohesion

Would you be happy to be contacted about any further COVID-19 related research focusing on the psychological impact on Doctors?  Yes  
 No

## CERA Survey 3

1  
2 Please complete the survey below.

3  
4 Thank you!

5  
6  
7 This is part 3 of the CERA study. Thank you for taking the time to fill out the questions below. It will take between 5  
8 to 7 minutes.

9  
10 We recommend using either a tablet or computer screen but the questions are accessible via mobile phones.

11  
12 All questions should be answered in reference to the COVID-19 pandemic. The Impact of Events Scale - Revised,  
13 should be answered in reference to your feelings over the last 7 days and all other questions should be answered in  
14 reference to your feelings over the past few weeks.

15  
16 Finally, we understand that throughout the COVID-19 pandemic many of you may have experienced very challenging  
17 events both in your personal and professional lives. We thank you for taking the time to complete this study and  
18 hope it offers an anonymised opportunity to report the psychological impact of this pandemic. If you need any further  
19 support there are details highlighted in the participant information leaflet that can be downloaded below.

20  
21 If you want to download the participant information leaflet, which outlines the study and available support, please  
22 download below.

23  
24  
25 [Attachment: "CERA PIS V 1.1.docx"]  
26

27  
28 I consent to taking part in CERA survey 3.

- Yes  
 No

**Impact of Events Scale - Revised**

**Below is a list of difficulties people sometimes have after stressful life events. Please read each item, and then indicate how distressing each difficulty has been for you DURING THE PAST SEVEN DAYS with respect to the COVID-19 PANDEMIC.**

**How much have you been distressed or bothered by these difficulties?**

|                                                                                                                       | Not at all            | A little bit          | Moderately            | Quite a bit           | Extremely             |
|-----------------------------------------------------------------------------------------------------------------------|-----------------------|-----------------------|-----------------------|-----------------------|-----------------------|
| Any reminder brought back feelings about it                                                                           | <input type="radio"/> |
| I had trouble staying asleep                                                                                          | <input type="radio"/> |
| Other things kept me thinking about it                                                                                | <input type="radio"/> |
| I felt irritable and angry                                                                                            | <input type="radio"/> |
| I avoided letting myself get upset when I thought about it or was reminded of it                                      | <input type="radio"/> |
| I thought about it when I didn't mean to                                                                              | <input type="radio"/> |
| I felt as if it hadn't happened or wasn't real                                                                        | <input type="radio"/> |
| I stayed away from reminders of it                                                                                    | <input type="radio"/> |
| Pictures about it popped into my head                                                                                 | <input type="radio"/> |
| I was jumpy and easily startled                                                                                       | <input type="radio"/> |
| I tried not to think about it                                                                                         | <input type="radio"/> |
| I was aware that I still had a lot of feelings about it, but I didn't deal with them                                  | <input type="radio"/> |
| My feelings about it were kind of numb                                                                                | <input type="radio"/> |
| I found myself acting or feeling like I was back at that time                                                         | <input type="radio"/> |
| I had trouble falling asleep                                                                                          | <input type="radio"/> |
| I had waves of strong feelings about it                                                                               | <input type="radio"/> |
| I tried to remove it from my memory                                                                                   | <input type="radio"/> |
| I had trouble concentrating                                                                                           | <input type="radio"/> |
| Reminders of it caused me to have physical reactions, such as sweating, trouble breathing, nausea or a pounding heart | <input type="radio"/> |

|   |                              |                       |                       |                       |                       |                       |
|---|------------------------------|-----------------------|-----------------------|-----------------------|-----------------------|-----------------------|
| 1 | I had dreams about it        | <input type="radio"/> |
| 2 | I felt watchful and on-guard | <input type="radio"/> |
| 3 |                              |                       |                       |                       |                       |                       |
| 4 | I tried not to talk about it | <input type="radio"/> |

- 5
- 6
- 7
- 8
- 9
- 10
- 11
- 12
- 13
- 14
- 15
- 16
- 17
- 18
- 19
- 20
- 21
- 22
- 23
- 24
- 25
- 26
- 27
- 28
- 29
- 30
- 31
- 32
- 33
- 34
- 35
- 36
- 37
- 38
- 39
- 40
- 41
- 42
- 43
- 44
- 45
- 46
- 47
- 48
- 49
- 50
- 51
- 52
- 53
- 54
- 55
- 56
- 57
- 58
- 59
- 60

For peer review only

**Occupational Factors**

How confident do you feel in the infection control training that has been provided to you?

- Not confident at all  
 Somewhat not confident  
 Neither not confident or confident  
 Somewhat confident  
 Very confident

How prepared do you feel to provide direct care to suspected cases?

- Completely unprepared  
 Somewhat unprepared  
 Neither unprepared or prepared  
 Somewhat prepared  
 Very prepared

How do you feel the care received by patients who are NOT presenting with either symptoms or a diagnosis of COVID-19 is?

- Significantly worse than before Covid-19  
 Slightly worse than before Covid-19  
 The same as before Covid-19  
 Slightly better than before Covid-19  
 Significantly better than before Covid-19

Have you been deployed back to your usual clinical area after re-deployment?

- Yes  
 No

How many suspected cases of COVID-19 have you had direct clinical contact with since March 1st 2020?

- 0  
 1-5  
 6-10  
 11-15  
 16-20  
 21-25  
 26-30  
 31-35  
 > 36

As far as you are aware, how many of these suspected cases have turned out to be confirmed cases of COVID-19?

- 0  
 1-5  
 6-10  
 11-15  
 16-20  
 21-25  
 26-30  
 31-35  
 > 36

How many patients have you witnessed dying with COVID-19?

- 0  
 1-5  
 6-10  
 11-15  
 16-20  
 21-25  
 26-30  
 31-35  
 > 36



**Personal Factors**

Do you feel exposure to the COVID-19 pandemic has increased symptoms of any established mental health condition(s) you have personally?

- Yes  
 No  
 Prefer not to disclose  
 I do not have an established mental health condition

Do you feel exposure to the COVID-19 pandemic has increased symptoms of any established physical health condition(s) you have personally?

- Yes  
 No  
 Prefer not to disclose  
 I do not have an established physical health condition

During the COVID-19 pandemic, have you felt at high risk of dying/death?

- Yes  
 No

I feel that my personal health is at risk during the COVID-19 outbreak due to my clinical role?

- Strongly disagree  
 Disagree  
 Neither agree nor disagree  
 Agree  
 Strongly agree

How worried are you about the potential risks if you were to become infected with COVID-19?

- Extremely worried  
 Generally worried  
 Neither worried or not worried  
 Generally not worried  
 Not worried at all

How worried are you about the potential risks to your family, loved ones or others due to your clinical role in the COVID-19 outbreak?

- Extremely worried  
 Generally worried  
 Neither worried or not worried  
 Generally not worried  
 Not worried at all

Have any of your family, friends, or loved ones become unwell or died due to COVID-19 or its complications? (select all that apply)

- Unwell at home  
 Unwell and required non-ICU hospital treatment  
 Unwell and required ICU treatment  
 Died

Have any of your colleagues become unwell or died due to COVID-19 or its complications? (select all that apply)

- Unwell at home  
 Unwell and required non-ICU hospital treatment  
 Unwell and required ICU treatment  
 Died

In the last 2 weeks I have felt well supported by friends and family

- Strongly disagree  
 Disagree  
 Neither agree nor disagree  
 Agree  
 Strongly agree

1 In the last 2 weeks I have felt well supported by the  
2 senior clinical leadership team

- Strongly disagree
- Disagree
- Neither agree nor disagree
- Agree
- Strongly agree

3  
4  
5  
6  
7  
8  
9  
10  
11  
12  
13  
14  
15  
16  
17  
18  
19  
20  
21  
22  
23  
24  
25  
26  
27  
28  
29  
30  
31  
32  
33  
34  
35  
36  
37  
38  
39  
40  
41  
42  
43  
44  
45  
46  
47  
48  
49  
50  
51  
52  
53  
54  
55  
56  
57  
58  
59  
60

For peer review only

**Personal Coronavirus**

Have you received a positive diagnosis of Coronavirus during this pandemic?  Yes  
 No

Have you been admitted to hospital due to your diagnosis of Coronavirus?  Yes  
 No

Have you had to self-isolate?  Yes  
 No

For what reason did you have to self-isolate? (select all that apply)

- Personal symptoms
- Personal diagnosis of COVID-19
- Symptoms of a member of the household
- Exposure to a positive case of COVID-19 in the work environment
- Exposure to a positive case of COVID-19 in your personal environment
- Other (eg return from travel to high risk area)

How many clinical shifts in your rota have you missed due to self-isolation?

- 0
- 1
- 2
- 3
- 4
- 5-7
- 8-10
- >10

Have you had a COVID-19 antibody test?  Yes  
 No  
 Prefer not to disclose

What was the result of your COVID-19 antibody test

- Positive
- Negative
- I have not yet received the result
- Prefer not to disclose

Have you been offered any of the following psychological interventions via your current place of work? (Select all that apply)

- Structured individual therapy with a therapist (in person/on telephone)
- Advice line / helpline
- Internet based psychological intervention
- Well-being app / website
- Brief TRiM / "safe space" session (trauma risk management)
- Other please state

Other, please specify

---

During your time working in the COVID-19 pandemic have you experienced any of the following? (Select all that apply)

- Feelings that you made a contribution
- A sense of personal accomplishment
- Improved confidence and self esteem
- Increased compassion
- Re-evaluation of self and purpose
- Work satisfaction
- A sense of team cohesion

---

1 Have you experienced any other factors during the  
2 COVID-19 pandemic that have made a positive impact  
3 on your psychological health? \_\_\_\_\_  
4  
5  
6  
7  
8  
9  
10  
11  
12  
13  
14  
15  
16  
17  
18  
19  
20  
21  
22  
23  
24  
25  
26  
27  
28  
29  
30  
31  
32  
33  
34  
35  
36  
37  
38  
39  
40  
41  
42  
43  
44  
45  
46  
47  
48  
49  
50  
51  
52  
53  
54  
55  
56  
57  
58  
59  
60

For peer review only

1 **The last 3 questions are optional and not related to the CERA study but will inform future**  
2 **planning for psychological interventions.**  
3  
4

5 **We would like to know more about the type of psychological support doctors prefer. If you**  
6 **needed psychological support in relation to the impact from the COVID-19 pandemic, what**  
7 **would your preferences be in relation to:**  
8  
9

10 a) Format

- Face to face individual  
 Face to face group therapy  
 Individual online therapy  
 Online support groups  
 Self help  
 Guided self help

16  
17 b) Timing

- Immediate support during the COVID-19 pandemic  
 Immediately after the COVID-19 pandemic  
 After the COVID-19 pandemic following a period of rest and recuperation

22 c) Mode of therapy

- Structured therapy e.g. CBT  
 Counselling  
 Peer support  
 Other

27 Please specify  
28  
29  
30  
31  
32  
33  
34  
35  
36  
37  
38  
39  
40  
41  
42  
43  
44  
45  
46  
47  
48  
49  
50  
51  
52  
53  
54  
55  
56  
57  
58  
59  
60

Psychological distress during the acceleration phase of the COVID-19 pandemic: a survey of doctors practising in Emergency Medicine, Anaesthesia and Intensive Care Medicine in the United Kingdom and Republic of Ireland

Research Checklist: The Checklist for Reporting Results of Internet E-Surveys (CHERRIES)

| <b>CHERRIES CHECKLIST ADAPTED FROM:</b>                                                                                                                                                                                            |                                  |                                                                                                                                                                                                                      |                                                                                                                                                                                                                                                                                                                 |
|------------------------------------------------------------------------------------------------------------------------------------------------------------------------------------------------------------------------------------|----------------------------------|----------------------------------------------------------------------------------------------------------------------------------------------------------------------------------------------------------------------|-----------------------------------------------------------------------------------------------------------------------------------------------------------------------------------------------------------------------------------------------------------------------------------------------------------------|
| Eysenbach, Gunther. "Improving the quality of Web surveys: the Checklist for Reporting Results of Internet E-Surveys (CHERRIES)." <i>Journal of medical Internet research</i> vol. 6,3 e34. 29 Sep. 2004, doi:10.2196/jmir.6.3.e34 |                                  |                                                                                                                                                                                                                      |                                                                                                                                                                                                                                                                                                                 |
| <b>Item Category</b>                                                                                                                                                                                                               | <b>Checklist Item</b>            | <b>Explanation</b>                                                                                                                                                                                                   | <b>Checklist Response</b>                                                                                                                                                                                                                                                                                       |
| <b>Design</b>                                                                                                                                                                                                                      | Describe survey design           | Describe target population, sample frame. Is the sample a convenience sample? (In "open" surveys this is most likely.)                                                                                               | <b>Outlined in 'Methods'</b>                                                                                                                                                                                                                                                                                    |
| <b>IRB (Institutional Review Board) approval and informed consent process</b>                                                                                                                                                      | IRB approval                     | Mention whether the study has been approved by an IRB.                                                                                                                                                               | <b>Outlined in 'Procedures'</b>                                                                                                                                                                                                                                                                                 |
|                                                                                                                                                                                                                                    | Informed consent                 | Describe the informed consent process. Where were the participants told the length of time of the survey, which data were stored and where and for how long, who the investigator was, and the purpose of the study? | <b>Outlined in 'Participants and Procedures'</b>                                                                                                                                                                                                                                                                |
|                                                                                                                                                                                                                                    | Data protection                  | If any personal information was collected or stored, describe what mechanisms were used to protect unauthorized access.                                                                                              | <b>Outlined in 'Procedures'</b>                                                                                                                                                                                                                                                                                 |
| <b>Development and pre-testing</b>                                                                                                                                                                                                 | Development and testing          | State how the survey was developed, including whether the usability and technical functionality of the electronic questionnaire had been tested before fielding the questionnaire.                                   | <b>Available in the published protocol</b><br>(Roberts T, Daniels J, Hulme W, et al. COVID-19 emergency response assessment study: a prospective longitudinal survey of frontline doctors in the UK and Ireland: study protocol. <i>BMJ Open</i> Published Online First: 2020. doi:10.1136/bmjopen-2020-039851) |
| <b>Recruitment process and description of the sample having access to the questionnaire</b>                                                                                                                                        | Open survey versus closed survey | An "open survey" is a survey open for each visitor of a site, while a closed survey is only open to a sample which the investigator knows (password-protected survey).                                               | <b>Outlined in 'Procedures' + protocol</b>                                                                                                                                                                                                                                                                      |
|                                                                                                                                                                                                                                    | Contact mode                     | Indicate whether or not the initial contact with the potential participants was made on the Internet. (Investigators may also send out questionnaires by mail and allow for Web-based data entry.)                   | <b>Outlined in 'Procedures' + protocol</b>                                                                                                                                                                                                                                                                      |
|                                                                                                                                                                                                                                    | Advertising the survey           | How/where was the survey announced or advertised? Some examples are                                                                                                                                                  | <b>Outlined in 'Procedures' + protocol</b>                                                                                                                                                                                                                                                                      |

|                              |                                          |                                                                                                                                                                                                                                                                                                                                                                                                                                              |                                                                                                                                          |
|------------------------------|------------------------------------------|----------------------------------------------------------------------------------------------------------------------------------------------------------------------------------------------------------------------------------------------------------------------------------------------------------------------------------------------------------------------------------------------------------------------------------------------|------------------------------------------------------------------------------------------------------------------------------------------|
|                              |                                          | offline media (newspapers), or online (mailing lists – If yes, which ones?) or banner ads (Where were these banner ads posted and what did they look like?). It is important to know the wording of the announcement as it will heavily influence who chooses to participate. Ideally the survey announcement should be published as an appendix.                                                                                            |                                                                                                                                          |
| <b>Survey administration</b> | Web/E-mail                               | State the type of e-survey (eg, one posted on a Web site, or one sent out through e-mail). If it is an e-mail survey, were the responses entered manually into a database, or was there an automatic method for capturing responses?                                                                                                                                                                                                         | <b><i>Outlined in 'Procedures' + protocol</i></b>                                                                                        |
|                              | Context                                  | Describe the Web site (for mailing list/newsgroup) in which the survey was posted. What is the Web site about, who is visiting it, what are visitors normally looking for? Discuss to what degree the content of the Web site could pre-select the sample or influence the results. For example, a survey about vaccination on a anti-immunization Web site will have different results from a Web survey conducted on a government Web site | <b><i>Outlined in 'Procedures' + protocol</i></b>                                                                                        |
|                              | Mandatory/voluntary                      | Was it a mandatory survey to be filled in by every visitor who wanted to enter the Web site, or was it a voluntary survey?                                                                                                                                                                                                                                                                                                                   | <ul style="list-style-type: none"> <li>- <b><i>Outlined in 'Procedures' + protocol</i></b></li> <li>- <b><i>voluntary</i></b></li> </ul> |
|                              | Incentives                               | Were any incentives offered (eg, monetary, prizes, or non-monetary incentives such as an offer to provide the survey results)?                                                                                                                                                                                                                                                                                                               | <b><i>No</i></b>                                                                                                                         |
|                              | Time/Date                                | In what timeframe were the data collected?                                                                                                                                                                                                                                                                                                                                                                                                   | <b><i>Outlined in 'Procedures' + protocol + Protocol</i></b>                                                                             |
|                              | Randomization of items or questionnaires | To prevent biases items can be randomized or alternated.                                                                                                                                                                                                                                                                                                                                                                                     | <b><i>Not done due to maximise completion of the GHQ-12</i></b>                                                                          |
|                              | Adaptive questioning                     | Use adaptive questioning (certain items, or only conditionally displayed based on responses to other items) to reduce number and complexity of the questions                                                                                                                                                                                                                                                                                 | <b><i>Outlined in protocol but yes 'branching logic' was used where appropriate</i></b>                                                  |
|                              | Number of Items                          | What was the number of questionnaire items per page? The number of items is an important factor for the completion rate.                                                                                                                                                                                                                                                                                                                     | <b><i>Outlined in 'online supplementary 2,3,4'</i></b>                                                                                   |
|                              | Number of screens (pages)                | Over how many pages was the questionnaire distributed? The number of items is an important factor for the completion rate.                                                                                                                                                                                                                                                                                                                   | <b><i>Outlined in 'online supplementary 2,3,4'</i></b>                                                                                   |
|                              | Completeness check                       | It is technically possible to do consistency or completeness checks before the questionnaire is submitted.                                                                                                                                                                                                                                                                                                                                   | <b><i>There were no completeness checks. The only mandatory items</i></b>                                                                |

|                       |                                                                                                           |                                                                                                                                                                                                                                                                                                                                                                                                                                                                                                                                |                                                                                                                                                                                                                                                                                                                                        |
|-----------------------|-----------------------------------------------------------------------------------------------------------|--------------------------------------------------------------------------------------------------------------------------------------------------------------------------------------------------------------------------------------------------------------------------------------------------------------------------------------------------------------------------------------------------------------------------------------------------------------------------------------------------------------------------------|----------------------------------------------------------------------------------------------------------------------------------------------------------------------------------------------------------------------------------------------------------------------------------------------------------------------------------------|
|                       |                                                                                                           | Was this done, and if “yes”, how (usually JavaScript)? An alternative is to check for completeness after the questionnaire has been submitted (and highlight mandatory items). If this has been done, it should be reported. All items should provide a non-response option such as “not applicable” or “rather not say”, and selection of one response option should be enforced.                                                                                                                                             | <b>were consent and email address. The decision not to include mandatory items and/or completeness checks was made due to a concern that mandatory items would increase rates of non-completion</b>                                                                                                                                    |
|                       | Review step                                                                                               | State whether respondents were able to review and change their answers (eg, through a Back button or a Review step which displays a summary of the responses and asks the respondents if they are correct).                                                                                                                                                                                                                                                                                                                    | <b>This was possible but has not been included in the manuscript</b>                                                                                                                                                                                                                                                                   |
| <b>Response rates</b> | Unique site visitor                                                                                       | If you provide view rates or participation rates, you need to define how you determined a unique visitor. There are different techniques available, based on IP addresses or cookies or both.                                                                                                                                                                                                                                                                                                                                  | <b>Outlined in ‘Figure 1’. Each access to the 1<sup>st</sup> survey page 1 was identified as a new unique visit, this was not limited by IP address or cookies</b>                                                                                                                                                                     |
|                       | View rate (Ratio of unique survey visitors/unique site visitors)                                          | Requires counting unique visitors to the first page of the survey, divided by the number of unique site visitors (not page views!). It is not unusual to have view rates of less than 0.1 % if the survey is voluntary                                                                                                                                                                                                                                                                                                         | <b>Survey site contains first page of survey therefore N/A</b>                                                                                                                                                                                                                                                                         |
|                       | Participation rate (Ratio of unique visitors who agreed to participate/unique first survey page visitors) | Count the unique number of people who filled in the first survey page (or agreed to participate, for example by checking a checkbox), divided by visitors who visit the first page of the survey (or the informed consents page, if present). This can also be called “recruitment” rate.                                                                                                                                                                                                                                      | <b>Outlined in ‘Figure 1’</b>                                                                                                                                                                                                                                                                                                          |
|                       | Completion rate (Ratio of users who finished the survey/users who agreed to participate)                  | The number of people submitting the last questionnaire page, divided by the number of people who agreed to participate (or submitted the first survey page). This is only relevant if there is a separate “informed consent” page or if the survey goes over several pages. This is a measure for attrition. Note that “completion” can involve leaving questionnaire items blank. This is not a measure for how completely questionnaires were filled in. (If you need a measure for this, use the word “completeness rate”.) | <b>Outlined in ‘Figure 1’</b>                                                                                                                                                                                                                                                                                                          |
|                       | <b>Preventing multiple entries from the same individual</b>                                               | Cookies used                                                                                                                                                                                                                                                                                                                                                                                                                                                                                                                   | Indicate whether cookies were used to assign a unique user identifier to each client computer. If so, mention the page on which the cookie was set and read, and how long the cookie was valid. Were duplicate entries avoided by preventing users access to the survey twice; or were duplicate database entries having the same user |



|                 |                                                     |                                                                                                                                                                                                                                                                                                                                                                                                                                                                                                                                                                            |                                                                                     |
|-----------------|-----------------------------------------------------|----------------------------------------------------------------------------------------------------------------------------------------------------------------------------------------------------------------------------------------------------------------------------------------------------------------------------------------------------------------------------------------------------------------------------------------------------------------------------------------------------------------------------------------------------------------------------|-------------------------------------------------------------------------------------|
|                 |                                                     | ID eliminated before analysis? In the latter case, which entries were kept for analysis (eg, the first entry or the most recent)?                                                                                                                                                                                                                                                                                                                                                                                                                                          |                                                                                     |
|                 | IP check                                            | Indicate whether the IP address of the client computer was used to identify potential duplicate entries from the same user. If so, mention the period of time for which no two entries from the same IP address were allowed (eg, 24 hours). Were duplicate entries avoided by preventing users with the same IP address access to the survey twice; or were duplicate database entries having the same IP address within a given period of time eliminated before analysis? If the latter, which entries were kept for analysis (eg, the first entry or the most recent)? | <b>Not used due to survey being completed on multi-user/single log-in computers</b> |
|                 | Log file analysis                                   | Indicate whether other techniques to analyze the log file for identification of multiple entries were used. If so, please describe.                                                                                                                                                                                                                                                                                                                                                                                                                                        | <b>Not done</b>                                                                     |
|                 | Registration                                        | In "closed" (non-open) surveys, users need to login first and it is easier to prevent duplicate entries from the same user. Describe how this was done. For example, was the survey never displayed a second time once the user had filled it in, or was the username stored together with the survey results and later eliminated? If the latter, which entries were kept for analysis (eg, the first entry or the most recent)?                                                                                                                                          | <b>N/A</b>                                                                          |
| <b>Analysis</b> | Handling of incomplete questionnaires               | Were only completed questionnaires analyzed? Were questionnaires which terminated early (where, for example, users did not go through all questionnaire pages) also analyzed?                                                                                                                                                                                                                                                                                                                                                                                              | <b>Outlined in 'Statistical Analysis' + Protocol</b>                                |
|                 | Questionnaires submitted with an atypical timestamp | Some investigators may measure the time people needed to fill in a questionnaire and exclude questionnaires that were submitted too soon. Specify the timeframe that was used as a cut-off point, and describe how this point was determined                                                                                                                                                                                                                                                                                                                               | <b>All questionnaires have timestamp of completion.</b>                             |
|                 | Statistical correction                              | Indicate whether any methods such as weighting of items or propensity scores have been used to adjust for the non-representative sample; if so, please describe the methods.                                                                                                                                                                                                                                                                                                                                                                                               | <b>Outlined in 'Statistical Analysis' + Protocol</b>                                |
